# Supplementary material
Source: PubMed Central journal article supplement (PMC10320628)

**Table S1:** Pharmacokinetics of IVO+VEN and IVO+VEN+AZA

| Pharmacokinetics by cohort                                                                                                                                                                                                                                                                                                                                                                                                                                                                                                     | Dose level 0<br>(N=6)                  | Dose level 1<br>(N=6)     | Dose level 2<br>(N=13)                 | Dose level 3<br>(N=6)                  |
|--------------------------------------------------------------------------------------------------------------------------------------------------------------------------------------------------------------------------------------------------------------------------------------------------------------------------------------------------------------------------------------------------------------------------------------------------------------------------------------------------------------------------------|----------------------------------------|---------------------------|----------------------------------------|----------------------------------------|
| <b>Venetoclax AUC<sub>0-24h</sub> (µg*hr/mL)</b>                                                                                                                                                                                                                                                                                                                                                                                                                                                                               |                                        |                           |                                        |                                        |
| Cycle 1 Day 14                                                                                                                                                                                                                                                                                                                                                                                                                                                                                                                 | 36.5 (53) <sup>a</sup><br>(4.21, 75.2) | 47.8 (86)<br>(12.2, 171)  | 20.4 (52) <sup>b</sup><br>(9.37, 39.6) | 32.4 (71) <sup>a</sup><br>(10.4, 80.0) |
| Cycle 2 Day 14                                                                                                                                                                                                                                                                                                                                                                                                                                                                                                                 | 11.0 (74)<br>(2.54, 31.2)              | 31.3 (32)<br>(20.2, 50.1) | 13.0 (51) <sup>c</sup><br>(3.78, 25.1) | 17.9 (56) <sup>e</sup><br>(10.2, 34.1) |
| <b>Venetoclax C<sub>max</sub> (µg/mL)</b>                                                                                                                                                                                                                                                                                                                                                                                                                                                                                      |                                        |                           |                                        |                                        |
| Cycle 1 Day 14                                                                                                                                                                                                                                                                                                                                                                                                                                                                                                                 | 2.34 (57) <sup>a</sup><br>(0.25, 5.08) | 3.15 (77)<br>(1.05, 9.74) | 1.31 (56) <sup>b</sup><br>(0.64, 2.99) | 2.43 (63)<br>(0.83, 5.07)              |
| Cycle 2 Day 14                                                                                                                                                                                                                                                                                                                                                                                                                                                                                                                 | 0.924 (65)<br>(0.22, 2.24)             | 2.27 (39)<br>(1.11, 3.46) | 1.01 (53) <sup>d</sup><br>(0.19, 2.18) | 1.30 (56) <sup>e</sup><br>(0.66, 2.49) |
| <p>AUC<sub>0-24h</sub> and C<sub>max</sub> values are presented as geometric mean (% coefficient of variation) (minimum, maximum)<br/> AUC<sub>0-24h</sub> = area under the plasma concentration-time curve from time 0 to 24 hours; C<sub>max</sub> = maximum observed plasma concentration.<br/> Some subjects were excluded due to incomplete concentration time profiles. The N that differed from what is in the column header was noted in footnotes:</p> <p>a. N=5<br/> b. N=11<br/> c. N=8<br/> d. N=9<br/> e. N=4</p> |                                        |                           |                                        |                                        |

**Table S2:** Treatment characteristics across the four dose levels in the phase 1b study population.

| Characteristic                                                                                | Study Cohort                 |                                  |                                  |                                   |                                  | p-value <sup>2</sup> |
|-----------------------------------------------------------------------------------------------|------------------------------|----------------------------------|----------------------------------|-----------------------------------|----------------------------------|----------------------|
|                                                                                               | Overall, N = 31 <sup>1</sup> | Dose level 1, N = 6 <sup>1</sup> | Dose level 2, N = 6 <sup>1</sup> | Dose level 3, N = 13 <sup>1</sup> | Dose level 4, N = 6 <sup>1</sup> |                      |
| Cycles received                                                                               | 4 (1 - 49)                   | 8 (2 - 49)                       | 6 (3 - 41)                       | 4 (1 - 25)                        | 4 (2 - 11)                       | 0.9                  |
| Cycle length, days (median [range])                                                           |                              |                                  |                                  |                                   |                                  |                      |
| Cycle 1                                                                                       | 32 (23 - 105)                | 27 (23 - 31)                     | 28 (27 - 30)                     | 38 (29 - 79)                      | 38 (28 - 105)                    | <0.001               |
| Cycle 2                                                                                       | 31 (27 - 62)                 | 28 (27 - 29)                     | 28 (28 - 34)                     | 33 (27 - 62)                      | 38 (28 - 48)                     | 0.14                 |
| Cycle 3                                                                                       | 28.0 (21.0 - 36.0)           | 28.0 (28.0 - 28.0)               | 28.0 (21.0 - 35.0)               | 33.0 (28.0 - 36.0)                | 32.0 (22.0 - 35.0)               | 0.4                  |
| Cycle 4                                                                                       | 28.0 (25.0 - 42.0)           | 28.0 (27.0 - 28.0)               | 28.0 (28.0 - 34.0)               | 30.5 (25.0 - 35.0)                | 35.0 (28.0 - 42.0)               | 0.5                  |
| Time on study, months (median [95% CI])                                                       | 5.26 (3.68-NE)               | 8.17 (2.2-NE)                    | 5.43 (3.88-NE)                   | 4.34 (3.06-NE)                    | 6.30 (4.44-NE)                   | 0.89                 |
| Cause of study discontinuation, N (%)                                                         |                              |                                  |                                  |                                   |                                  | 0.2                  |
| Deceased                                                                                      | 1 / 31 (3.2%)                | 1 / 6 (17%)                      | 0 / 6 (0%)                       | 0 / 13 (0%)                       | 0 / 6 (0%)                       |                      |
| No Response                                                                                   | 1 / 31 (3.2%)                | 1 / 6 (17%)                      | 0 / 6 (0%)                       | 0 / 13 (0%)                       | 0 / 6 (0%)                       |                      |
| On Study                                                                                      | 9 / 31 (29%)                 | 2 / 6 (33%)                      | 1 / 6 (17%)                      | 4 / 13 (31%)                      | 2 / 6 (33%)                      |                      |
| Progression                                                                                   | 8 / 31 (26%)                 | 2 / 6 (33%)                      | 3 / 6 (50%)                      | 3 / 13 (23%)                      | 0 / 6 (0%)                       |                      |
| HCT                                                                                           | 12 / 31 (39%)                | 0 / 6 (0%)                       | 2 / 6 (33%)                      | 6 / 13 (46%)                      | 4 / 6 (67%)                      |                      |
| Treatment drug adherence cycles 1-4, mean (SD)                                                |                              |                                  |                                  |                                   |                                  |                      |
| Venetoclax                                                                                    | 0.93 (0.25)                  | 1.00 (0.05)                      | 1.03 (0.14)                      | 0.89 (0.25)                       | 0.83 (0.37)                      | 0.028                |
| Ivosidenib                                                                                    | 0.96 (0.14)                  | 0.93 (0.22)                      | 0.99 (0.03)                      | 0.96 (0.12)                       | 0.95 (0.17)                      | >0.9                 |
| Azacitidine                                                                                   | 0.89 (0.29)                  |                                  |                                  | 0.91 (0.25)                       | 0.86 (0.36)                      | 0.8                  |
|                                                                                               |                              |                                  |                                  |                                   |                                  |                      |
| <sup>1</sup> Median (Range)                                                                   |                              |                                  |                                  |                                   |                                  |                      |
| <sup>2</sup> Kruskal-Wallis rank sum test; Pearson's Chi-squared test; Wilcoxon rank sum test |                              |                                  |                                  |                                   |                                  |                      |

**Table S3: Study medication adherence.** (A), Adherence to protocol administered medications during DLT evaluation period (cycles 1 and 2) of protocol directed therapy. (B), Adherence to protocol administered medications during the first 12 months of protocol directed therapy.

**A**

| Mean dose adherence by study agent across DLT evaluation period | Dose Level 1 (N=6) | Dose Level 2 (N=6) | Dose Level 3 (N=13) | Dose Level 4 (N=6) |
|-----------------------------------------------------------------|--------------------|--------------------|---------------------|--------------------|
| <b>Venetoclax</b>                                               |                    |                    |                     |                    |
| Cycle 1                                                         | 102%               | 100%               | 95%                 | 100%               |
| Cycle 1 and 2                                                   | 101%               | 100%               | 95%                 | 93%                |
| <b>Ivosidenib</b>                                               |                    |                    |                     |                    |
| Cycle 1                                                         | 98%                | 100%               | 94%                 | 87%                |
| Cycle 1 and 2                                                   | 98%                | 99%                | 94%                 | 93%                |
| <b>Azacitidine</b>                                              |                    |                    |                     |                    |
| Cycle 1                                                         | -                  | -                  | 100%                | 100%               |
| Cycle 1 and 2                                                   | -                  | -                  | 95%                 | 92%                |

**B**

| Mean dose adherence by study agent across cycles 1-12* | Dose Level 1 (N=6) | Dose Level 2 (N=6) | Dose Level 3 (N=13) | Dose Level 4 (N=6) |
|--------------------------------------------------------|--------------------|--------------------|---------------------|--------------------|
| <b>Venetoclax</b>                                      | 100%               | 80%                | 72%                 | 67%                |
| <b>Ivosidenib</b>                                      | 97%                | 98%                | 98%                 | 98%                |
| <b>Azacitidine</b>                                     | -                  | -                  | 74%                 | 85%                |

\*N.B. One patient in DL3 and DL4 had AZA and VEN omitted starting with cycle 2 and cycle 3, respectively, accounting for the decreased VEN adherence observed in these dose levels

**Table S4:** Dose modifications in patients experiencing hematologic adverse events during the entire study period until data cut-off on March 15<sup>th</sup>, 2022.

| Accession # | Cohort       | Treatment           | Disease    | Event            | Cycle | Action                                 |
|-------------|--------------|---------------------|------------|------------------|-------|----------------------------------------|
| 14          | Dose Level 2 | IVO+ VEN 800 mg     | MDS or MPN | Thrombocytopenia | 2     | VEN reduction to 7 days                |
| 10          | Dose Level 2 | IVO+ VEN 800 mg     | R/R-AML    | Thrombocytopenia | 8     | VEN dose reduced from 800 mg to 400 mg |
| 16          | Dose Level 3 | IVO+VEN 400 mg +AZA | ND-AML     | Cytopenias       | 3     | Azacitidine reduced to 5 days          |
| 18          | Dose Level 3 | IVO+VEN 400 mg +AZA | ND-AML     | Neutropenia      | 3     | VEN dose reduced to 10 days            |
| 18          | Dose Level 3 | IVO+VEN 400 mg +AZA | ND-AML     | Cytopenias       | 9     | AZA dose reduced to 5 days             |
| 18          | Dose Level 3 | IVO+VEN 400 mg +AZA | ND-AML     | Cytopenias       | 10    | VEN dose reduced to 7 days             |
| 18          | Dose Level 3 | IVO+VEN 400 mg +AZA | ND-AML     | Cytopenias       | 11    | VEN dose reduced to 5 days             |
| 18          | Dose Level 3 | IVO+VEN 400 mg +AZA | ND-AML     | Cytopenias       | 11    | AZA dose reduced to 3 days             |
| 20          | Dose Level 3 | IVO+VEN 400 mg +AZA | ND-AML     | Cytopenias       | 3     | AZA and VEN omitted                    |
| 22          | Dose Level 3 | IVO+VEN 400 mg +AZA | ND-AML     | Cytopenias       | 2     | AZA reduced to 5 days                  |
| 22          | Dose Level 3 | IVO+VEN 400 mg +AZA | ND-AML     | Cytopenias       | 2     | VEN reduced to 7 days                  |
| 26          | Dose Level 3 | IVO+VEN 400 mg +AZA | ND-AML     | Neutropenia      | 5     | AZA reduced to 5 days                  |
| 26          | Dose Level 3 | IVO+VEN 400 mg +AZA | ND-AML     | Neutropenia      | 9     | VEN dose reduced to 10 days            |
| 27          | Dose Level 3 | IVO+VEN 400 mg +AZA | ND-AML     | Anemia           | 10    | AZA dose reduced to 5 days             |
| 29          | Dose Level 4 | IVO+VEN 800 mg +AZA | ND-AML     | Cytopenias       | 4     | VEN dose reduced to 7 days             |
| 29          | Dose Level 4 | IVO+VEN 800 mg +AZA | ND-AML     | Cytopenias       | 6     | AZA dose reduced to 5 days             |
| 31          | Dose Level 4 | IVO+VEN 800 mg +AZA | MDS or MPN | Thrombocytopenia | 2     | AZA and VEN omitted                    |
| 33          | Dose Level 4 | IVO+VEN 800 mg +AZA | MDS or MPN | Cytopenias       | 4     | IVO held 6 days                        |
| 33          | Dose Level 4 | IVO+VEN 800 mg +AZA | MDS or MPN | Cytopenias       | 5     | VEN dose reduced to 10 days            |

**Table S5:** Regions covered by institutional next-generation sequencing (NGS) interrogating the entire exonic or hotspot regions of 81-genes frequently mutated in myeloid malignancies.

| Coverage by gene and codon(s) tested with >250x coverage |                                                                                                                                                                                                                                                                                                                                                                                                                            |
|----------------------------------------------------------|----------------------------------------------------------------------------------------------------------------------------------------------------------------------------------------------------------------------------------------------------------------------------------------------------------------------------------------------------------------------------------------------------------------------------|
| Gene                                                     | Exons (codons) tested                                                                                                                                                                                                                                                                                                                                                                                                      |
| ANKRD26<br>(NM_014915)                                   | 1 (1-6)                                                                                                                                                                                                                                                                                                                                                                                                                    |
| ASXL1<br>(NM_015338)                                     | 11-12 (362-892), 12 (897-932), 12 (939-1290), 12 (1300-1442), 12 (1450-1542)                                                                                                                                                                                                                                                                                                                                               |
| ASXL2<br>(NM_018263)                                     | 11 (381-604), 12 (621-1436)                                                                                                                                                                                                                                                                                                                                                                                                |
| BCOR<br>(NM_017745)                                      | 2 (1-15), 3-4 (29-62), 4 (71-181), 4 (206-219), 4 (227-323), 4 (331-431), 4 (465-509), 4 (538-576), 4 (579-636), 4 (642-660), 4 (685-751), 4 (764-774), 4-6 (778-1080), 8 (1181-1207), 8 (1215-1234), 9 (1274-1289), 9 (1314-1336), 10 (1360-1366), 10 (1407-1442), 11 (1471-1490), 11 (1468), 12 (1498-1511), 13-14 (1556-1603), 14 (1608-1625), 15 (1664-1722)                                                           |
| BCORL1<br>(NM_021946)                                    | 1-2 (1-59), 3 (63-112), 3 (124-213), 3 (220-246), 3 (252-279), 3 (283-320), 3 (323-383), 3 (392-412), 3 (425-558), 3 (575-608), 3 (613-725), 3 (738-807), 3 (862-1069), 3 (1080-1101), 3-4 (1132-1203), 5 (1206-1230), 6 (1235-1252), 6 (1292-1311), 6 (1326), 7 (1360-1365), 7 (1377-1378), 7 (1382-1428), 7 (1431-1435), 8 (1452-1479), 9 (1491-1540), 10-11 (1548-1582), 11 (1584-1588), 12 (1618-1664), 12 (1710-1712) |
| BRAF<br>(NM_004333)                                      | 11 (439-478), 15 (581-620)                                                                                                                                                                                                                                                                                                                                                                                                 |
| BRINP3<br>(NM_199051)                                    | 2-6 (1-314), 7-8 (335-471), 8 (475-500), 8 (503-767)                                                                                                                                                                                                                                                                                                                                                                       |
| CALR<br>(NM_004343)                                      | 9 (352-417)                                                                                                                                                                                                                                                                                                                                                                                                                |
| CBL (NM_005188)                                          | 7-9 (336-449), 9 (454-477)                                                                                                                                                                                                                                                                                                                                                                                                 |
| CBLB<br>(NM_170662)                                      | 7 (282-287), 7 (297-328), 8 (332-357), 9 (372-397), 10 (402-469)                                                                                                                                                                                                                                                                                                                                                           |
| CBLC<br>(NM_012116)                                      | 7-9 (336-454), 10 (465-475)                                                                                                                                                                                                                                                                                                                                                                                                |
| CEBPA<br>(NM_004364)                                     | 1 (1-70), 1 (128-175), 1 (178-201), 1 (249-358)                                                                                                                                                                                                                                                                                                                                                                            |
| CREBBP<br>(NM_004380)                                    | 1-8 (1-608), 9-10 (615-705), 12-14 (720-837), 14-16 (840-1084), 17-22 (1094-1287), 22-31 (1297-1943), 31 (1950-2115), 31 (2121-2443)                                                                                                                                                                                                                                                                                       |
| CSF3R<br>(NM_156039)                                     | 14 (575-622), 17 (681-800), 17 (822-864)                                                                                                                                                                                                                                                                                                                                                                                   |
| CUX1<br>(NM_181552)                                      | 2 (11-46), 3-6 (48-172), 6-9 (174-241), 10-12 (266-359), 13 (368-375), 14 (378-408)                                                                                                                                                                                                                                                                                                                                        |
| DDX41<br>(NM_016222)                                     | 1-5 (1-129), 5-10 (134-366), 11 (387-410), 12-17 (420-623)                                                                                                                                                                                                                                                                                                                                                                 |
| DNMT3A<br>(NM_022552)                                    | 8-9 (288-347), 9-22 (349-862), 23 (866-913)                                                                                                                                                                                                                                                                                                                                                                                |
| EED (NM_003797)                                          | 1-2 (1-57), 2 (66-69), 2-8 (71-287), 9-12 (289-442)                                                                                                                                                                                                                                                                                                                                                                        |
| ELANE<br>(NM_001972)                                     | 1-2 (1-48), 2 (69-75), 4-5 (123-268)                                                                                                                                                                                                                                                                                                                                                                                       |

|                       |                                                                                                                                                                                                                                                                                                                                  |
|-----------------------|----------------------------------------------------------------------------------------------------------------------------------------------------------------------------------------------------------------------------------------------------------------------------------------------------------------------------------|
| ETNK1<br>(NM_018638)  | 3 (228-275)                                                                                                                                                                                                                                                                                                                      |
| ETV6<br>(NM_001987)   | 1-3 (1-97), 4 (110-147), 5-6 (155-378), 7-8 (385-453)                                                                                                                                                                                                                                                                            |
| EZH2<br>(NM_004456)   | 2-3 (3-48), 3-4 (57-121), 5 (158), 7 (209-217), 8 (243-303), 9-12 (320-494), 13 (502-512), 14 (516-538), 14 (547-558), 15 (616-617), 15 (558-569), 15 (571-613), 16-19 (618-732), 20 (752)                                                                                                                                       |
| FBXW7<br>(NM_033632)  | 9-12 (413-708)                                                                                                                                                                                                                                                                                                                   |
| FLT3 (NM_004119)      | 11-18 (437-758), 19-20 (764-847)                                                                                                                                                                                                                                                                                                 |
| GATA1<br>(NM_002049)  | 2 (12-51), 2 (57-60), 2 (65-74), 3 (83-84)                                                                                                                                                                                                                                                                                       |
| GATA2<br>(NM_032638)  | 2-5 (22-377), 5 (379-381), 6 (383-481)                                                                                                                                                                                                                                                                                           |
| GFI1 (NM_005263)      | 2 (2-39)                                                                                                                                                                                                                                                                                                                         |
| GNAS<br>(NM_000516)   | 8 (200-202), 11 (315-324)                                                                                                                                                                                                                                                                                                        |
| HNRNPK<br>(NM_002140) | 3-6 (1-86), 8-11 (111-270), 11 (290-318), 11 (270), 11 (278-283), 12-16 (318-454)                                                                                                                                                                                                                                                |
| HRAS<br>(NM_005343)   | 2-3 (1-59), 3-4 (87-150)                                                                                                                                                                                                                                                                                                         |
| IDH1 (NM_005896)      | 4 (132-133)                                                                                                                                                                                                                                                                                                                      |
| IDH2 (NM_002168)      | 4 (125-178)                                                                                                                                                                                                                                                                                                                      |
| IKZF1<br>(NM_006060)  | 2-8 (1-377), 8 (382-392), 8 (403-430), 8 (445)                                                                                                                                                                                                                                                                                   |
| IL2RG<br>(NM_000206)  | 1 (15), 1 (27-39), 2 (88-90), 2 (60-67), 2 (78), 3 (90-148), 4 (152-196), 5-6 (199-285), 7-8 (296-339)                                                                                                                                                                                                                           |
| IL7R (NM_002185)      | 5-7 (180-292)                                                                                                                                                                                                                                                                                                                    |
| JAK1<br>(NM_002227)   | 3-9 (3-445), 10 (453-465), 10-22 (470-1023), 22-24 (1026-1123)                                                                                                                                                                                                                                                                   |
| JAK2<br>(NM_004972)   | 10 (405-442), 12-14 (505-622), 16 (665-711), 18 (762-802)                                                                                                                                                                                                                                                                        |
| JAK3<br>(NM_000215)   | 2-6 (1-224), 6 (261-284), 7-23 (288-1069)                                                                                                                                                                                                                                                                                        |
| KDM6A<br>(NM_021140)  | 1-2 (1-70), 3 (76-106), 6 (148-186), 8 (207-218), 10 (268-292), 12 (325-339), 12-13 (347-443), 15 (476-503), 16 (510-526), 16 (545-559), 16 (574-610), 17 (642-700), 17 (709-899), 19 (945-956), 20 (1006-1030), 20 (1036-1048), 23 (1097), 24 (1145-1180), 25-26 (1235-1249), 27 (1298-1304), 27-28 (1309-1388), 29 (1393-1402) |
| KIT (NM_000222)       | 8-9 (411-514), 11 (550-592), 17 (788-828)                                                                                                                                                                                                                                                                                        |
| KMT2A<br>(NM_005933)  | 2-3 (145-544), 3 (553-902), 3 (915-1032), 3-4 (1034-1075), 4-7 (1081-1277), 7 (1286-1334), 8-10 (1338-1441), 11 (1445-1493), 12-13 (1505-1560), 14-15 (1566-1665), 27 (2178), 27 (2201-2362), 27 (2395-2412), 27 (2427-2452), 27 (2472-2715), 27 (2720-3210), 27 (3219-3327), 27 (3342-3541), 27 (3545-3582)                     |
| KRAS<br>(NM_004985)   | 2-4 (1-150)                                                                                                                                                                                                                                                                                                                      |
| MAP2K1<br>(NM_002755) | 2 (27-90), 3 (99-146)                                                                                                                                                                                                                                                                                                            |
| MPL (NM_005373)       | 10 (490-522), 12 (552-636)                                                                                                                                                                                                                                                                                                       |

|                           |                                                                                                                                                                                                                                                                                                                                                                                                                                                                                                                                         |
|---------------------------|-----------------------------------------------------------------------------------------------------------------------------------------------------------------------------------------------------------------------------------------------------------------------------------------------------------------------------------------------------------------------------------------------------------------------------------------------------------------------------------------------------------------------------------------|
| NF1<br>(NM_001042492)     | 2-4 (21-160), 5 (165-190), 6 (201-218), 8-9 (244-305), 9 (310-354), 10-11 (359-398), 12-13 (421-468), 13-14 (478-547), 16 (574-612), 17 (645-667), 18 (674-728), 18-21 (746-819), 21 (836-950), 23 (1018-1038), 25 (1066-1078), 25-26 (1081-1146), 27-30 (1166-1330), 30 (1353-1370), 32-34 (1392-1490), 35 (1526-1549), 35 (1563-1575), 36-38 (1601-1868), 39 (1870-1884), 39-40 (1886-1947), 40-43 (1961-2211), 44-47 (2215-2322), 47-48 (2325-2394), 49 (2397-2436), 49 (2439), 50-51 (2441-2490), 51 (2495-2539), 53-58 (2580-2840) |
| NOTCH1<br>(NM_017617)     | 26 (1529-1594), 26-28 (1604-1795), 34 (2069-2230), 34 (2234-2256), 34 (2266-2273), 34 (2294-2309), 34 (2294-2556), 34 (2266-2273), 34 (2069-2230), 34 (2234-2256), 34 (2309-2556)                                                                                                                                                                                                                                                                                                                                                       |
| NPM1<br>(NM_002520)       | 11 (283-294)                                                                                                                                                                                                                                                                                                                                                                                                                                                                                                                            |
| NRAS<br>(NM_002524)       | 2-4 (1-150)                                                                                                                                                                                                                                                                                                                                                                                                                                                                                                                             |
| PAX5<br>(NM_016734)       | 1-10 (1-392)                                                                                                                                                                                                                                                                                                                                                                                                                                                                                                                            |
| PHF6<br>(NM_032458)       | 2 (4), 2-3 (11-78), 4 (110-122), 6 (140-166), 6-7 (172-228), 7 (232-236), 8 (260-265), 9 (279-297), 9-10 (305-337), 10 (352-366)                                                                                                                                                                                                                                                                                                                                                                                                        |
| PIGA<br>(NM_002641)       | 2 (6), 2 (16-134), 2 (151-162), 2 (194-209), 3 (239-256), 3 (262-283), 4 (312-314), 5 (328-337), 5 (386-390), 6 (422-485)                                                                                                                                                                                                                                                                                                                                                                                                               |
| PML (NM_033238)           | 3 (201-255)                                                                                                                                                                                                                                                                                                                                                                                                                                                                                                                             |
| PRPF40B<br>(NM_001031698) | 2 (2-15), 2-10 (20-228), 10-19 (232-609), 19 (611-626), 20 (629-638), 20 (647-658), 20-25 (661-821), 25-26 (824-893)                                                                                                                                                                                                                                                                                                                                                                                                                    |
| PTEN<br>(NM_000314)       | 7-8 (212-286), 8 (309-338)                                                                                                                                                                                                                                                                                                                                                                                                                                                                                                              |
| PTPN11<br>(NM_002834)     | 3-4 (46-125), 7 (253-285), 12 (460-462), 12-13 (465-533)                                                                                                                                                                                                                                                                                                                                                                                                                                                                                |
| RAD21<br>(NM_006265)      | 2-3 (1-75), 4 (92-125), 5-7 (131-249), 7 (261-272), 8-12 (275-540), 13 (544-560), 14 (569-632)                                                                                                                                                                                                                                                                                                                                                                                                                                          |
| RARA<br>(NM_000964)       | 6-7 (211-338)                                                                                                                                                                                                                                                                                                                                                                                                                                                                                                                           |
| RUNX1<br>(NM_001754)      | 2-9 (1-437), 9 (456-474)                                                                                                                                                                                                                                                                                                                                                                                                                                                                                                                |
| SETBP1<br>(NM_015559)     | 4 (838-885)                                                                                                                                                                                                                                                                                                                                                                                                                                                                                                                             |
| SF1 (NM_004630)           | 1-2 (1-54), 3-13 (57-579), 13 (582-640)                                                                                                                                                                                                                                                                                                                                                                                                                                                                                                 |
| SF3A1<br>(NM_005877)      | 1-7 (1-322), 7-9 (355-424), 9-12 (427-646), 13-16 (651-794)                                                                                                                                                                                                                                                                                                                                                                                                                                                                             |
| SF3B1<br>(NM_012433)      | 13 (574-593), 14 (603-638), 14-16 (649-790)                                                                                                                                                                                                                                                                                                                                                                                                                                                                                             |
| SH2B3<br>(NM_005475)      | 2 (1-98), 2 (132-164), 2-6 (212-374), 6-8 (380-576)                                                                                                                                                                                                                                                                                                                                                                                                                                                                                     |
| SMC1A<br>(NM_006306)      | 1 (13-37), 2 (90-100), 2 (37-66), 2 (78-82), 3-4 (100-202), 5 (206-223), 5 (238-283), 6 (285-311), 6 (321-369), 7 (372-386), 8-14 (419-749), 14 (758-771), 15 (791-807), 16 (828-851), 17-18 (855-935), 18-19 (943-973), 20-22 (997-1146), 24 (1173-1186), 24 (1204-1205), 25 (1223-1234)                                                                                                                                                                                                                                               |
| SMC3<br>(NM_005445)       | 1 (1-5), 2 (19), 3-4 (31-65), 5-6 (67-110), 7-11 (117-298), 11-13 (308-435), 14-15 (446-477), 15-16 (498-504), 16-17 (507-580), 17-19 (591-                                                                                                                                                                                                                                                                                                                                                                                             |

|                        |                                                                                                                                                                                                                                                                                                                                                 |
|------------------------|-------------------------------------------------------------------------------------------------------------------------------------------------------------------------------------------------------------------------------------------------------------------------------------------------------------------------------------------------|
|                        | 706), 20 (708-728), 21-24 (762-894), 24-25 (913-975), 25 (983-1035), 26-27 (1038-1150), 28-29 (1159-1202)                                                                                                                                                                                                                                       |
| SRSF2<br>(NM_003016)   | 1 (1-38), 1 (45-121)                                                                                                                                                                                                                                                                                                                            |
| STAG1<br>(NM_005862)   | 2 (1-4), 3 (10-27), 4-5 (45-101), 5-6 (121-153), 6-7 (156-188), 7-8 (194-276), 10-12 (301-392), 13-19 (408-679), 20 (684-703), 21-22 (724-738), 22-24 (740-808), 24-25 (831-895), 26-27 (897-953), 27 (955-979), 28 (985-1008), 29-34 (1022-1259)                                                                                               |
| STAG2<br>(NM_006603)   | 2 (1-11), 4 (42-94), 6 (129-144), 6-8 (152-259), 10 (298-339), 12 (375-386), 12-13 (394-422), 14 (462-468), 15 (473-512), 18 (581-592), 18 (594-595), 18-19 (600-675), 22 (735-746), 23-24 (765-802), 24 (822-843), 25 (847-891), 26 (913-925), 27 (928-970), 28 (975-982), 28-29 (996-1083), 30 (1093-1125), 30-31 (1133-1177), 33 (1225-1232) |
| STAT3<br>(NM_139276)   | 17 (489-503), 17-22 (506-715)                                                                                                                                                                                                                                                                                                                   |
| STAT5A<br>(NM_003152)  | 3-6 (1-177), 6-7 (181-189), 8-14 (268-506), 14-20 (516-795)                                                                                                                                                                                                                                                                                     |
| STAT5B<br>(NM_012448)  | 16 (636-673)                                                                                                                                                                                                                                                                                                                                    |
| SUZ12<br>(NM_015355)   | 1 (20-44), 1 (46-83), 4 (129-132), 5 (158-169), 7-9 (198-319), 10 (342-401), 11 (403-425), 12-16 (468-687), 16 (697-740)                                                                                                                                                                                                                        |
| TERC<br>(NR_001566)    | 1 (1-36)                                                                                                                                                                                                                                                                                                                                        |
| TERT<br>(NM_198253)    | 1 (1-24), 2 (74-165), 2 (258-300), 2 (312-342), 2 (349-474), 2-4 (477-630), 4-5 (633-677), 6 (711-749), 6-8 (753-800), 8-12 (805-954), 12-16 (957-1133)                                                                                                                                                                                         |
| TET2<br>(NM_001127208) | 3 (1-42), 3 (45-77), 3 (91-92), 3 (98-725), 3 (735-796), 3 (805-815), 3 (883-1137), 4-7 (1139-1318), 8-10 (1333-1434), 10 (1448-1454), 10-11 (1467-2003)                                                                                                                                                                                        |
| TP53<br>(NM_000546)    | 2 (1-25), 4 (80-125), 5-11 (133-394)                                                                                                                                                                                                                                                                                                            |
| U2AF1<br>(NM_006758)   | 2 (15-44), 6 (117-161)                                                                                                                                                                                                                                                                                                                          |
| U2AF2<br>(NM_007279)   | 1 (1-17), 3-5 (62-161), 6-12 (163-437), 12 (441-448), 12 (452-476)                                                                                                                                                                                                                                                                              |
| WT1 (NM_024426)        | 1 (2-44), 1 (122-166), 1-10 (179-518)                                                                                                                                                                                                                                                                                                           |
| ZRSR2<br>(NM_005089)   | 1 (1-14), 2 (24-37), 3 (41-64), 7 (147-159), 7 (172-186), 8 (239-257), 10 (276-296), 10-11 (302-413), 11 (481-483)                                                                                                                                                                                                                              |



**Table S6:** Variants identified using targeted 81-gene myeloid NGS panel

| Accession | Report    | Gene   | HGVS                                 | dbSNP       | COSMIC    | Strand | Loc     | Type  | Freq (%) | Coverage | Variant(+) | varcov | chromosome | coordinates     | genomic position | ref | variant |
|-----------|-----------|--------|--------------------------------------|-------------|-----------|--------|---------|-------|----------|----------|------------|--------|------------|-----------------|------------------|-----|---------|
| 1         | Diagnosis | SMC3   | NM_005445.3(SMC3):c.920T>C p.L307P   |             |           | +      | Exon 11 | SNV   | 32       | 1309     | T->C       | 417    | chr10      | chr10:112343257 | 112343257        | T   | C       |
| 1         | Diagnosis | IDH1   | NM_005896.3(IDH1):c.395G>A p.R132H   | rs121913500 | COSM28746 | -      | Exon 4  | SNV   | 10       | 2661     | G->A       | 255    | chr2       | chr2:209113112  | 209113112        | C   | T       |
| 1         | Diagnosis | NPM1   | NM_002520.6(NPM1):c.860_863dupTCTG   |             |           | +      | Exon 11 | Indel | 35       | 2904     | G->GTCTG   | 1022   | chr5       | chr5:170837547  | 170837547        | G   | GTCTG   |
| 1         | Diagnosis | NRAS   | NM_002524.5(NRAS):c.35G>A p.G12D     | rs121913237 | COSM564   | -      | Exon 2  | SNV   | 22       | 5199     | G->A       | 1168   | chr1       | chr1:115258747  | 115258747        | C   | T       |
| 3         | Diagnosis | NPM1   | NM_002520.6(NPM1):c.860_863dupTCTG   |             |           | +      | Exon 11 | Indel | 28       | 3175     | G->GTCTG   | 896    | chr5       | chr5:170837547  | 170837547        | G   | GTCTG   |
| 3         | Diagnosis | DNMT3A | NM_022552.4(DNMT3A):c.2644C>T        |             | COSM53042 | -      | Exon 23 | SNV   | 19       | 2528     | C->T       | 485    | chr2       | chr2:25457243   | 25457243         | G   | A       |
| 3         | Diagnosis | NRAS   | NM_002524.5(NRAS):c.38G>A p.G13D     | rs121434596 | COSM573   | -      | Exon 2  | SNV   | 24       | 5200     | G->A       | 1254   | chr1       | chr1:115258744  | 115258744        | C   | T       |
| 3         | Diagnosis | IDH1   | NM_005896.3(IDH1):c.395G>A p.R132H   | rs121913500 | COSM28746 | -      | Exon 4  | SNV   | 18       | 3040     | G->A       | 552    | chr2       | chr2:209113112  | 209113112        | C   | T       |
| 4         | Diagnosis | JAK2   | NM_004972.3(JAK2):c.1849G>T p.V617F  | rs77375493  | COSM12600 | +      | Exon 14 | SNV   | 3        | 4605     | G->T       | 153    | chr9       | chr9:5073770    | 5073770          | G   | T       |
| 4         | Diagnosis | IDH1   | NM_005896.3(IDH1):c.395G>A p.R132H   | rs121913500 | COSM28746 | -      | Exon 4  | SNV   | 38       | 2013     | G->A       | 759    | chr2       | chr2:209113112  | 209113112        | C   | T       |
| 4         | Diagnosis | SRSF2  | NM_003016.4(SRSF2):c.284C>A p.P95H   |             |           | -      | Exon 1  | SNV   | 42       | 1226     | C->A       | 520    | chr17      | chr17:74732959  | 74732959         | G   | T       |
| 4         | Diagnosis | SH2B3  | NM_005475.3(SH2B3):c.1226G>C p.G409A |             |           | +      | Exon 6  | SNV   | 34       | 689      | G->C       | 233    | chr12      | chr12:111885338 | 111885338        | G   | C       |
| 4         | Diagnosis | ASXL2  | NM_018263.6(ASXL2):c.1780C>T p.Q594* |             |           | -      | Exon 12 | SNV   | 42       | 1359     | C->T       | 566    | chr2       | chr2:25972645   | 25972645         | G   | A       |
| 4         | Relapse   | SRSF2  | NM_003016.4(SRSF2):c.284C>A p.P95H   |             |           | -      | Exon 1  | SNV   | 33       | 1841     | C->A       | 613    | chr17      | chr17:74732959  | 74732959         | G   | T       |
| 4         | Relapse   | JAK2   | NM_004972.3(JAK2):c.1849G>T p.V617F  | rs77375493  | COSM12600 | +      | Exon 14 | SNV   | 2        | 4950     | G->T       | 84     | chr9       | chr9:5073770    | 5073770          | G   | T       |
| 4         | Relapse   | IDH1   | NM_005896.3(IDH1):c.395G>A p.R132H   | rs121913500 | COSM28746 | -      | Exon 4  | SNV   | 29       | 1998     | G->A       | 574    | chr2       | chr2:209113112  | 209113112        | C   | T       |
| 4         | Relapse   | SH2B3  | NM_005475.3(SH2B3):c.1226G>C p.G409A |             |           | +      | Exon 6  | SNV   | 28       | 1099     | G->C       | 305    | chr12      | chr12:111885338 | 111885338        | G   | C       |
| 4         | Relapse   | ASXL2  | NM_018263.6(ASXL2):c.1780C>T p.Q594* |             |           | -      | Exon 12 | SNV   | 32       | 1849     | C->T       | 591    | chr2       | chr2:25972645   | 25972645         | G   | A       |
| 4         | Relapse   | TET2   | NM_001127208.2(TET2):c.5698G>C       |             |           | +      | Exon 11 | SNV   | 1        | 2565     | G->C       | 31     | chr4       | chr4:106197365  | 106197365        | G   | C       |
| 4         | Relapse   | ETV6   | NM_001987.5(ETV6):c.775dupC          |             |           | +      | Exon 5  | Indel | 2        | 2358     | G->GC      | 38     | chr12      | chr12:12022669  | 12022669         | G   | GC      |

|   |           |       |                                          |             |           |   |         |       |    |      |       |      |       |                |           |   |    |
|---|-----------|-------|------------------------------------------|-------------|-----------|---|---------|-------|----|------|-------|------|-------|----------------|-----------|---|----|
| 4 | Relapse   | ETV6  | NM_001987.5(ETV6):<br>c.1075C>G p.R359G  |             |           | + | Exon 6  | SNV   | 3  | 665  | C->G  | 25   | chr12 | chr12:12037444 | 12037444  | C | G  |
| 5 | Diagnosis | RUNX1 | NM_001754.4(RUNX1):<br>c.485G>A p.R162K  |             | COSM96546 | - | Exon 5  | SNV   | 16 | 620  | G->A  | 100  | chr21 | chr21:36252877 | 36252877  | C | T  |
| 5 | Diagnosis | IDH1  | NM_005896.3(IDH1):<br>c.394C>T p.R132C   | rs121913499 | COSM28747 | - | Exon 4  | SNV   | 22 | 2111 | C->T  | 463  | chr2  | chr2:209113113 | 209113113 | G | A  |
| 5 | Diagnosis | TET2  | NM_001127208.2(TE<br>T2):c.2665A>T       |             |           | + | Exon 3  | SNV   | 4  | 1932 | A->T  | 73   | chr4  | chr4:106157764 | 106157764 | A | T  |
| 5 | Remission | SF3B1 | NM_012433.3(SF3B1)<br>:c.2098A>G p.K700E |             | COSM84677 | - | Exon 15 | SNV   | 4  | 2754 | A->G  | 105  | chr2  | chr2:198266834 | 198266834 | T | C  |
| 5 | Remission | TET2  | NM_001127208.2(TE<br>T2):c.4138C>T       |             | COSM87161 | + | Exon 9  | SNV   | 1  | 2959 | C->T  | 34   | chr4  | chr4:106190860 | 106190860 | C | T  |
| 5 | Remission | TET2  | NM_001127208.2(TE<br>T2):c.2665A>T       |             |           | + | Exon 3  | SNV   | 15 | 779  | A->T  | 115  | chr4  | chr4:106157764 | 106157764 | A | T  |
| 5 | Remission | TET2  | NM_001127208.2(TE<br>T2):c.4138C>T       |             | COSM87161 | + | Exon 9  | SNV   | 2  | 3014 | C->T  | 46   | chr4  | chr4:106190860 | 106190860 | C | T  |
| 5 | Remission | TET2  | NM_001127208.2(TE<br>T2):c.2290del       |             |           | + | Exon 3  | Indel | 2  | 1015 | C->   | 19   | chr4  | chr4:106157389 | 106157389 | C |    |
| 5 | Remission | TET2  | NM_001127208.2(TE<br>T2):c.2665A>T       |             |           | + | Exon 3  | SNV   | 12 | 731  | A->T  | 86   | chr4  | chr4:106157764 | 106157764 | A | T  |
| 5 | Remission | SF3B1 | NM_012433.3(SF3B1)<br>:c.2098A>G p.K700E |             | COSM84677 | - | Exon 15 | SNV   | 3  | 3303 | A->G  | 94   | chr2  | chr2:198266834 | 198266834 | T | C  |
| 5 | Relapse   | SF3B1 | NM_012433.3(SF3B1)<br>:c.2098A>G p.K700E |             | COSM84677 | - | Exon 15 | SNV   | 2  | 3001 | A->G  | 59   | chr2  | chr2:198266834 | 198266834 | T | C  |
| 5 | Relapse   | TET2  | NM_001127208.2(TE<br>T2):c.4138C>T       |             | COSM87161 | + | Exon 9  | SNV   | 1  | 3282 | C->T  | 45   | chr4  | chr4:106190860 | 106190860 | C | T  |
| 5 | Relapse   | TET2  | NM_001127208.2(TE<br>T2):c.2665A>T       |             |           | + | Exon 3  | SNV   | 13 | 1026 | A->T  | 132  | chr4  | chr4:106157764 | 106157764 | A | T  |
| 5 | Relapse   | TET2  | NM_001127208.2(TE<br>T2):c.2290del       |             |           | + | Exon 3  | Indel | 2  | 1451 | C->   | 23   | chr4  | chr4:106157389 | 106157389 | C |    |
| 6 | Diagnosis | ASXL1 | NM_015338.6(ASXL1)<br>:c.1934dupG        |             |           | + | Exon 13 | Indel | 38 | 1005 | T->TG | 381  | chr20 | chr20:31022449 | 31022449  | T | TG |
| 6 | Diagnosis | JAK2  | NM_004972.3(JAK2):<br>c.1849G>T p.V617F  | rs77375493  | COSM12600 | + | Exon 14 | SNV   | 45 | 6354 | G->T  | 2868 | chr9  | chr9:5073770   | 5073770   | G | T  |
| 6 | Diagnosis | IDH1  | NM_005896.3(IDH1):<br>c.394C>T p.R132C   | rs121913499 | COSM28747 | - | Exon 4  | SNV   | 48 | 2890 | C->T  | 1383 | chr2  | chr2:209113113 | 209113113 | G | A  |
| 6 | Diagnosis | U2AF1 | NM_006758.2(U2AF1)<br>):c.470A>C p.Q157P |             |           | - | Exon 6  | SNV   | 47 | 3733 | A->C  | 1766 | chr21 | chr21:44514777 | 44514777  | T | G  |
| 8 | Diagnosis | TET2  | NM_001127208.2(TE<br>T2):c.2872C>T       |             |           | + | Exon 3  | SNV   | 5  | 2861 | C->T  | 153  | chr4  | chr4:106157971 | 106157971 | C | T  |
| 8 | Diagnosis | IDH1  | NM_005896.3(IDH1):<br>c.394C>A p.R132S   | rs121913499 | COSM28748 | - | Exon 4  | SNV   | 7  | 2524 | C->A  | 173  | chr2  | chr2:209113113 | 209113113 | G | T  |
| 8 | Remission | TET2  | NM_001127208.2(TE<br>T2):c.2872C>T       |             |           | + | Exon 3  | SNV   | 5  | 3483 | C->T  | 178  | chr4  | chr4:106157971 | 106157971 | C | T  |

|   |           |       |                                                          |             |           |   |         |       |    |      |                         |     |       |                |           |   |                            |
|---|-----------|-------|----------------------------------------------------------|-------------|-----------|---|---------|-------|----|------|-------------------------|-----|-------|----------------|-----------|---|----------------------------|
| 8 | Remission | IDH1  | NM_005896.3(IDH1):<br>c.394C>A p.R132S                   | rs121913499 | COSM28748 | - | Exon 4  | SNV   | 5  | 2803 | C->A                    | 155 | chr2  | chr2:209113113 | 209113113 | G | T                          |
| 8 | Remission | IDH1  | NM_005896.3(IDH1):<br>c.394C>A p.R132S                   | rs121913499 | COSM28748 | - | Exon 4  | SNV   | 3  | 1489 | C->A                    | 40  | chr2  | chr2:209113113 | 209113113 | G | T                          |
| 8 | Remission | TET2  | NM_001127208.2(TE<br>T2):c.2872C>T                       |             |           | + | Exon 3  | SNV   | 9  | 2611 | C->T                    | 229 | chr4  | chr4:106157971 | 106157971 | C | T                          |
| 8 | Remission | TET2  | NM_001127208.2(TE<br>T2):c.2872C>T                       |             |           | + | Exon 3  | SNV   | 12 | 1932 | C->T                    | 238 | chr4  | chr4:106157971 | 106157971 | C | T                          |
| 8 | Remission | IDH1  | NM_005896.3(IDH1):<br>c.394C>A p.R132S                   | rs121913499 | COSM28748 | - | Exon 4  | SNV   | 1  | 1555 | C->A                    | 17  | chr2  | chr2:209113113 | 209113113 | G | T                          |
| 8 | Remission | U2AF1 | NM_006758.2(U2AF1<br>):c.101C>T p.S34F                   |             |           | - | Exon 2  | SNV   | 2  | 1072 | C->T                    | 18  | chr21 | chr21:44524456 | 44524456  | G | A                          |
| 8 | Remission | TET2  | NM_001127208.2(TE<br>T2):c.2872C>T                       |             |           | + | Exon 3  | SNV   | 16 | 3444 | C->T                    | 563 | chr4  | chr4:106157971 | 106157971 | C | T                          |
| 8 | Remission | IDH1  | NM_005896.3(IDH1):<br>c.394C>A p.R132S                   | rs121913499 | COSM28748 | - | Exon 4  | SNV   | 2  | 2666 | C->A                    | 40  | chr2  | chr2:209113113 | 209113113 | G | T                          |
| 8 | Remission | U2AF1 | NM_006758.2(U2AF1<br>):c.101C>T p.S34F                   |             |           | - | Exon 2  | SNV   | 5  | 818  | C->T                    | 38  | chr21 | chr21:44524456 | 44524456  | G | A                          |
| 8 | Remission | TET2  | NM_001127208.2(TE<br>T2):c.2872C>T                       |             |           | + | Exon 3  | SNV   | 18 | 3242 | C->T                    | 595 | chr4  | chr4:106157971 | 106157971 | C | T                          |
| 8 | Remission | IDH1  | NM_005896.3(IDH1):<br>c.394C>A p.R132S                   | rs121913499 | COSM28748 | - | Exon 4  | SNV   | 2  | 1787 | C->A                    | 27  | chr2  | chr2:209113113 | 209113113 | G | T                          |
| 9 | Diagnosis | TP53  | NM_000546.5(TP53):<br>c.715A>G p.N239D                   |             | COSM10777 | - | Exon 7  | SNV   | 3  | 2096 | A->G                    | 62  | chr17 | chr17:7577566  | 7577566   | T | C                          |
| 9 | Diagnosis | FLT3  | NM_004119.3(FLT3):<br>c.2503G>C p.D835H                  | rs121913488 | COSM785   | - | Exon 20 | SNV   | 5  | 2069 | G->C                    | 112 | chr13 | chr13:28592642 | 28592642  | C | G                          |
| 9 | Diagnosis | ASXL1 | NM_015338.6(ASXL1)<br>:c.1534C>T p.Q512*                 |             |           | + | Exon 12 | SNV   | 33 | 2864 | C->T                    | 942 | chr20 | chr20:31021535 | 31021535  | C | T                          |
| 9 | Diagnosis | IDH1  | NM_005896.3(IDH1):<br>c.394C>T p.R132C                   | rs121913499 | COSM28747 | - | Exon 4  | SNV   | 31 | 1756 | C->T                    | 550 | chr2  | chr2:209113113 | 209113113 | G | A                          |
| 9 | Diagnosis | EZH2  | NM_004456.5(EZH2):<br>c.308_327dupCAGTT<br>GCTTCAGTACCCA |             |           | - | Exon 4  | Indel | 5  | 1522 | -<br>>CAGTTG<br>CTTCAGT | 83  | chr7  | chr7:148529781 | 148529781 | C | CTATGG<br>GTACTG<br>AAGCAA |
| 9 | Diagnosis | STAG2 | NM_006603.5(STAG2<br>):c.3097C>T p.R1033*                |             |           | + | Exon 29 | SNV   | 28 | 1200 | C->T                    | 333 | chrX  | chrX:123220440 | 123220440 | C | T                          |
| 9 | Relapse   | FLT3  | NM_004119.3(FLT3):<br>c.2503G>C p.D835H                  | rs121913488 | COSM785   | - | Exon 20 | SNV   | 3  | 1309 | G->C                    | 36  | chr13 | chr13:28592642 | 28592642  | C | G                          |
| 9 | Relapse   | RUNX1 | NM_001754.4(RUNX<br>1):c.602G>A p.R201Q                  | rs74315450  | COSM24805 | - | Exon 6  | SNV   | 3  | 1301 | G->A                    | 38  | chr21 | chr21:36231782 | 36231782  | C | T                          |
| 9 | Relapse   | TP53  | NM_000546.5(TP53):<br>c.715A>G p.N239D                   |             | COSM10777 | - | Exon 7  | SNV   | 2  | 3379 | A->G                    | 53  | chr17 | chr17:7577566  | 7577566   | T | C                          |
| 9 | Relapse   | IDH1  | NM_005896.3(IDH1):<br>c.394C>T p.R132C                   | rs121913499 | COSM28747 | - | Exon 4  | SNV   | 24 | 1222 | C->T                    | 293 | chr2  | chr2:209113113 | 209113113 | G | A                          |
| 9 | Relapse   | NRAS  | NM_002524.5(NRAS)<br>:c.37G>C p.G13R                     | rs121434595 | COSM569   | - | Exon 2  | SNV   | 12 | 1830 | G->C                    | 224 | chr1  | chr1:115258745 | 115258745 | C | G                          |

|    |           |        |                                                  |             |            |   |         |       |    |      |                 |      |       |                 |           |                |                            |
|----|-----------|--------|--------------------------------------------------|-------------|------------|---|---------|-------|----|------|-----------------|------|-------|-----------------|-----------|----------------|----------------------------|
| 9  | Relapse   | PTPN11 | NM_002834.4(PTPN11):c.178G>C p.G60R              |             | COSM13010  | + | Exon 3  | SNV   | 2  | 1644 | G->C            | 30   | chr12 | chr12:112888162 | 112888162 | G              | C                          |
| 9  | Relapse   | ASXL1  | NM_015338.6(ASXL1):c.1534C>T p.Q512*             |             |            | + | Exon 12 | SNV   | 41 | 2883 | C->T            | 1174 | chr20 | chr20:31021535  | 31021535  | C              | T                          |
| 9  | Relapse   | STAG2  | NM_006603.5(STAG2):c.3097C>T p.R1033*            |             |            | + | Exon 29 | SNV   | 4  | 842  | C->T            | 31   | chrX  | chrX:123220440  | 123220440 | C              | T                          |
| 9  | Relapse   | EZH2   | NM_004456.5(EZH2):c.308_327dupCAGTTGCTTCAGTACCCA |             |            | - | Exon 4  | Indel | 12 | 1081 | ->CAGTTGCTTCAGT | 134  | chr7  | chr7:148529781  | 148529781 | C              | CTATGG<br>GTACTG<br>AAGCAA |
| 9  | Relapse   | CEBPA  | NM_004364.4(CEBPA):c.174_184del                  |             |            | - | Exon 1  | Indel | 13 | 424  | CGAGACGTCCA->   | 55   | chr19 | chr19:33793137  | 33793137  | TGGAC<br>GTCTC |                            |
| 9  | Relapse   | CEBPA  | NM_004364.4(CEBPA):c.765del p.L256fs*62          |             |            | - | Exon 1  | Indel | 22 | 408  | G->             | 90   | chr19 | chr19:33792556  | 33792556  | C              |                            |
| 9  | Relapse   | STAG2  | NM_006603.5(STAG2):c.1002G>A p.W334*             |             |            | + | Exon 10 | SNV   | 4  | 1620 | G->A            | 65   | chrX  | chrX:123184144  | 123184144 | G              | A                          |
| 9  | Relapse   | RUNX1  | NM_001754.4(RUNX1):c.911dupC                     |             |            | - | Exon 8  | Indel | 12 | 2266 | ->C             | 270  | chr21 | chr21:36171654  | 36171654  | G              | GG                         |
| 10 | Diagnosis | NPM1   | NM_002520.6(NPM1):c.860_863dupTCTG               |             |            | + | Exon 11 | Indel | 27 | 2113 | G->GTCTG        | 580  | chr5  | chr5:170837547  | 170837547 | G              | GTCTG                      |
| 10 | Diagnosis | SRSF2  | NM_003016.4(SRSF2):c.284C>A p.P95H               |             |            | - | Exon 1  | SNV   | 28 | 565  | C->A            | 158  | chr17 | chr17:74732959  | 74732959  | G              | T                          |
| 10 | Diagnosis | PTPN11 | NM_002834.4(PTPN11):c.1508G>A                    |             | COSM13021  | + | Exon 13 | SNV   | 7  | 2390 | G->A            | 178  | chr12 | chr12:112926888 | 112926888 | G              | A                          |
| 10 | Diagnosis | IDH1   | NM_005896.3(IDH1):c.394C>A p.R132S               | rs121913499 | COSM28748  | - | Exon 4  | SNV   | 18 | 1579 | C->A            | 290  | chr2  | chr2:209113113  | 209113113 | G              | T                          |
| 10 | Diagnosis | DNMT3A | NM_022552.4(DNMT3A):c.2312G>A                    |             | COSM133732 | - | Exon 19 | SNV   | 22 | 1242 | G->A            | 277  | chr2  | chr2:25463181   | 25463181  | C              | T                          |
| 10 | Diagnosis | RAD21  | NM_006265.3(RAD21):c.1577_1581del                |             |            | - | Exon 12 | Indel | 27 | 871  | AGAAG->         | 237  | chr8  | chr8:117862896  | 117862896 | CTTCT          |                            |
| 10 | Remission | GNAS   | NM_000516.6(GNAS):c.602G>A p.R201H               | rs121913495 | COSM27895  | + | Exon 8  | SNV   | 1  | 2365 | G->A            | 24   | chr20 | chr20:57484421  | 57484421  | G              | A                          |
| 10 | Remission | GNAS   | NM_000516.6(GNAS):c.602G>A p.R201H               | rs121913495 | COSM27895  | + | Exon 8  | SNV   | 1  | 2352 | G->A            | 24   | chr20 | chr20:57484421  | 57484421  | G              | A                          |
| 11 | Diagnosis | NPM1   | NM_002520.6(NPM1):c.863_864insCCTG               |             | COSM17573  | + | Exon 11 | Indel | 51 | 3890 | C->CCCTG        | 1976 | chr5  | chr5:170837548  | 170837548 | C              | CCCTG                      |
| 11 | Diagnosis | NRAS   | NM_002524.5(NRAS):c.34G>T p.G12C                 | rs121913250 | COSM562    | - | Exon 2  | SNV   | 28 | 6063 | G->T            | 1722 | chr1  | chr1:115258748  | 115258748 | C              | A                          |
| 11 | Diagnosis | IDH1   | NM_005896.3(IDH1):c.395G>A p.R132H               | rs121913500 | COSM28746  | - | Exon 4  | SNV   | 29 | 3551 | G->A            | 1045 | chr2  | chr2:209113112  | 209113112 | C              | T                          |
| 11 | Diagnosis | DNMT3A | NM_022552.4(DNMT3A):c.2271T>A                    |             |            | - | Exon 19 | SNV   | 40 | 3601 | T->A            | 1458 | chr2  | chr2:25463222   | 25463222  | A              | T                          |
| 11 | Diagnosis | CEBPA  | NM_004364.4(CEBPA):c.504dupT p.E169*             |             |            | - | Exon 1  | Indel | 48 | 629  | ->T             | 305  | chr19 | chr19:33792817  | 33792817  | T              | TA                         |
| 11 | Diagnosis | WT1    | NM_024426.6(WT1):c.1155dupG p.S386fs*4           |             |            | - | Exon 7  | Indel | 2  | 4225 | ->G             | 70   | chr11 | chr11:32417912  | 32417912  | C              | CC                         |

|    |           |        |                                                  |             |           |   |                    |       |    |      |                                                                                    |      |       |                |           |                                                                               |       |
|----|-----------|--------|--------------------------------------------------|-------------|-----------|---|--------------------|-------|----|------|------------------------------------------------------------------------------------|------|-------|----------------|-----------|-------------------------------------------------------------------------------|-------|
| 11 | Remission | NRAS   | NM_002524.5(NRAS)<br>:c.34G>T p.G12C             | rs121913250 | COSM562   | - | Exon 2             | SNV   | 38 | 4856 | G->T                                                                               | 1825 | chr1  | chr1:115258748 | 115258748 | C                                                                             | A     |
| 11 | Remission | NPM1   | NM_002520.6(NPM1)<br>:c.863_864insCCTG           |             | COSM17573 | + | Exon 11            | Indel | 43 | 2812 | C->CCCTG                                                                           | 1208 | chr5  | chr5:170837548 | 170837548 | C                                                                             | CCCTG |
| 11 | Remission | DNMT3A | NM_022552.4(DNMT3A)<br>:c.2271T>A                |             |           | - | Exon 19            | SNV   | 40 | 2978 | T->A                                                                               | 1182 | chr2  | chr2:25463222  | 25463222  | A                                                                             | T     |
| 11 | Remission | IDH1   | NM_005896.3(IDH1):<br>c.395G>A p.R132H           | rs121913500 | COSM28746 | - | Exon 4             | SNV   | 36 | 2553 | G->A                                                                               | 915  | chr2  | chr2:209113112 | 209113112 | C                                                                             | T     |
| 11 | Remission | CEBPA  | NM_004364.4(CEBPA)<br>:c.504dupT p.E169*         |             |           | - | Exon 1             | Indel | 41 | 509  | ->T                                                                                | 208  | chr19 | chr19:33792817 | 33792817  | T                                                                             | TA    |
| 11 | Relapse   | NRAS   | NM_002524.5(NRAS)<br>:c.34G>T p.G12C             | rs121913250 | COSM562   | - | Exon 2             | SNV   | 45 | 3050 | G->T                                                                               | 1372 | chr1  | chr1:115258748 | 115258748 | C                                                                             | A     |
| 11 | Relapse   | DNMT3A | NM_022552.4(DNMT3A)<br>:c.2271T>A                |             |           | - | Exon 19            | SNV   | 39 | 2468 | T->A                                                                               | 974  | chr2  | chr2:25463222  | 25463222  | A                                                                             | T     |
| 11 | Relapse   | NPM1   | NM_002520.6(NPM1)<br>:c.863_864insCCTG           |             | COSM17573 | + | Exon 11            | Indel | 57 | 869  | C->CCCTG                                                                           | 496  | chr5  | chr5:170837548 | 170837548 | C                                                                             | CCCTG |
| 11 | Relapse   | IDH1   | NM_005896.3(IDH1):<br>c.395G>A p.R132H           | rs121913500 | COSM28746 | - | Exon 4             | SNV   | 39 | 1391 | G->A                                                                               | 548  | chr2  | chr2:209113112 | 209113112 | C                                                                             | T     |
| 11 | Relapse   | CEBPA  | NM_004364.4(CEBPA)<br>:c.504dupT p.E169*         |             |           | - | Exon 1             | Indel | 44 | 439  | ->T                                                                                | 195  | chr19 | chr19:33792817 | 33792817  | T                                                                             | TA    |
| 12 | Diagnosis | DNMT3A | NM_022552.4(DNMT3A)<br>:c.2645G>A                | rs147001633 | COSM52944 | - | Exon 23            | SNV   | 43 | 1791 | G->A                                                                               | 765  | chr2  | chr2:25457242  | 25457242  | C                                                                             | T     |
| 12 | Diagnosis | IDH1   | NM_005896.3(IDH1):<br>c.394C>G p.R132G           |             | COSM28749 | - | Exon 4             | SNV   | 43 | 2922 | C->G                                                                               | 1269 | chr2  | chr2:209113113 | 209113113 | G                                                                             | C     |
| 13 | Diagnosis | CALR   | NM_004343.3(CALR):<br>c.1099_1150del p.L367fs*46 |             |           | + | Exon 9             | Indel | 31 | 299  | CTTAAGG<br>AGGAGGA<br>AGAAGAC<br>AAGAAAC<br>GCAAAGA<br>GGAGGA<br>GGAGGC<br>AGAGG-> | 94   | chr19 | chr19:13054572 | 13054572  | GGAGG<br>AGGAA<br>GAAGA<br>CAAGA<br>AACGC<br>AAAGA<br>GGAGG<br>AGGAG<br>GCAGA |       |
| 13 | Diagnosis | SETBP1 | NM_015559.3(SETBP1)<br>:c.2608G>A                |             |           | + | Exon 4             | SNV   | 29 | 5212 | G->A                                                                               | 1504 | chr18 | chr18:42531913 | 42531913  | G                                                                             | A     |
| 13 | Diagnosis | IDH1   | NM_005896.3(IDH1):<br>c.394C>T p.R132C           | rs121913499 | COSM28747 | - | Exon 4             | SNV   | 21 | 2667 | C->T                                                                               | 561  | chr2  | chr2:209113113 | 209113113 | G                                                                             | A     |
| 13 | Diagnosis | EZH2   | NM_004456.5(EZH2):<br>c.1988A>G p.Y663C          |             |           | - | Exon 17            | SNV   | 2  | 1870 | A->G                                                                               | 38   | chr7  | chr7:148507466 | 148507466 | T                                                                             | C     |
| 13 | Diagnosis | ASXL1  | NM_015338.6(ASXL1)<br>:c.1934dupG                |             |           | + | Exon 13            | Indel | 25 | 718  | T->TG                                                                              | 183  | chr20 | chr20:31022449 | 31022449  | T                                                                             | TG    |
| 13 | Diagnosis | EZH2   | NM_004456.5(EZH2):<br>c.1672+2T>G p.?            |             |           | - | Splice?<br>(Intron | SNV   | 28 | 2973 | T->G                                                                               | 821  | chr7  | chr7:148512004 | 148512004 | A                                                                             | C     |

|    |           |        |                                                     |             |           |   |                    |       |    |      |                                                                                    |      |       |                |           |                                                                               |       |
|----|-----------|--------|-----------------------------------------------------|-------------|-----------|---|--------------------|-------|----|------|------------------------------------------------------------------------------------|------|-------|----------------|-----------|-------------------------------------------------------------------------------|-------|
| 13 | Remission | CALR   | NM_004343.3(CALR):<br>c.1099_1150del<br>p.L367fs*46 |             |           | + | Exon 9             | Indel | 18 | 490  | CTTAAGG<br>AGGAGGA<br>AGAAGAC<br>AAGAAAC<br>GCAAAGA<br>GGAGGA<br>GGAGGC<br>AGAGG-> | 89   | chr19 | chr19:13054572 | 13054572  | GGAGG<br>AGGAA<br>GAAGA<br>CAAGA<br>AACGC<br>AAAGA<br>GGAGG<br>AGGAG<br>GCAGA |       |
| 13 | Remission | ASXL1  | NM_015338.6(ASXL1)<br>:c.1934dupG                   |             |           | + | Exon 13            | Indel | 29 | 1065 | T->TG                                                                              | 316  | chr20 | chr20:31022449 | 31022449  | T                                                                             | TG    |
| 13 | Remission | EZH2   | NM_004456.5(EZH2):<br>c.1988A>G p.Y663C             |             |           | - | Exon 17            | SNV   | 19 | 2410 | A->G                                                                               | 464  | chr7  | chr7:148507466 | 148507466 | T                                                                             | C     |
| 13 | Remission | SETBP1 | NM_015559.3(SETBP1):<br>c.2608G>A                   |             |           | + | Exon 4             | SNV   | 2  | 5781 | G->A                                                                               | 138  | chr18 | chr18:42531913 | 42531913  | G                                                                             | A     |
| 13 | Remission | EZH2   | NM_004456.5(EZH2):<br>c.1672+2T>G p.?               |             |           | - | Splice?<br>(Intron | SNV   | 4  | 3394 | T->G                                                                               | 127  | chr7  | chr7:148512004 | 148512004 | A                                                                             | C     |
| 14 | Diagnosis | IDH1   | NM_005896.3(IDH1):<br>c.395G>A p.R132H              | rs121913500 | COSM28746 | - | Exon 4             | SNV   | 22 | 1011 | G->A                                                                               | 218  | chr2  | chr2:209113112 | 209113112 | C                                                                             | T     |
| 14 | Diagnosis | DNMT3A | NM_022552.4(DNMT3A):<br>c.1627G>T                   |             | COSM87002 | - | Exon 14            | SNV   | 34 | 422  | G->T                                                                               | 145  | chr2  | chr2:25467449  | 25467449  | C                                                                             | A     |
| 14 | Diagnosis | NPM1   | NM_002520.6(NPM1)<br>:c.860_863dupTCTG              |             |           | + | Exon 11            | Indel | 38 | 2108 | G-<br>>GTCTG                                                                       | 809  | chr5  | chr5:170837547 | 170837547 | G                                                                             | GTCTG |
| 14 | Remission | NPM1   | NM_002520.6(NPM1)<br>:c.860_863dupTCTG              |             |           | + | Exon 11            | Indel | 5  | 2345 | G-<br>>GTCTG                                                                       | 119  | chr5  | chr5:170837547 | 170837547 | G                                                                             | GTCTG |
| 14 | Remission | DNMT3A | NM_022552.4(DNMT3A):<br>c.1627G>T                   |             | COSM87002 | - | Exon 14            | SNV   | 10 | 2321 | G->T                                                                               | 236  | chr2  | chr2:25467449  | 25467449  | C                                                                             | A     |
| 14 | Remission | IDH1   | NM_005896.3(IDH1):<br>c.395G>A p.R132H              | rs121913500 | COSM28746 | - | Exon 4             | SNV   | 4  | 2431 | G->A                                                                               | 91   | chr2  | chr2:209113112 | 209113112 | C                                                                             | T     |
| 14 | Relapse   | NPM1   | NM_002520.6(NPM1)<br>:c.860_863dupTCTG              |             |           | + | Exon 11            | Indel | 49 | 1617 | G-<br>>GTCTG                                                                       | 790  | chr5  | chr5:170837547 | 170837547 | G                                                                             | GTCTG |
| 14 | Relapse   | FBXW7  | NM_033632.3(FBXW7):<br>c.2065C>T                    |             | COSM27083 | - | Exon 12            | SNV   | 1  | 5212 | C->T                                                                               | 69   | chr4  | chr4:153244092 | 153244092 | G                                                                             | A     |
| 14 | Relapse   | DNMT3A | NM_022552.4(DNMT3A):<br>c.1627G>T                   |             | COSM87002 | - | Exon 14            | SNV   | 39 | 1519 | G->T                                                                               | 596  | chr2  | chr2:25467449  | 25467449  | C                                                                             | A     |
| 14 | Relapse   | CEBPA  | NM_004364.4(CEBPA)<br>:c.68dupC p.H24fs*84          |             |           | - | Exon 1             | Indel | 1  | 2037 | ->C                                                                                | 26   | chr19 | chr19:33793253 | 33793253  | G                                                                             | GG    |
| 15 | Diagnosis | TP53   | NM_000546.5(TP53):<br>c.587G>C p.R196P              |             | COSM43814 | - | Exon 6             | SNV   | 69 | 2915 | G->C                                                                               | 1998 | chr17 | chr17:7578262  | 7578262   | C                                                                             | G     |
| 15 | Diagnosis | IDH1   | NM_005896.3(IDH1):<br>c.394C>T p.R132C              | rs121913499 | COSM28747 | - | Exon 4             | SNV   | 23 | 1658 | C->T                                                                               | 389  | chr2  | chr2:209113113 | 209113113 | G                                                                             | A     |
| 15 | Diagnosis | SF3B1  | NM_012433.3(SF3B1)<br>:c.2098A>G p.K700E            |             | COSM84677 | - | Exon 15            | SNV   | 36 | 2391 | A->G                                                                               | 868  | chr2  | chr2:198266834 | 198266834 | T                                                                             | C     |
| 15 | Diagnosis | ASXL1  | NM_015338.6(ASXL1)<br>:c.1934dupG                   |             |           | + | Exon 13            | Indel | 5  | 776  | T->TG                                                                              | 42   | chr20 | chr20:31022449 | 31022449  | T                                                                             | TG    |

|    |           |        |                                                      |             |           |   |                    |       |    |      |                                       |      |       |                |           |                                  |       |
|----|-----------|--------|------------------------------------------------------|-------------|-----------|---|--------------------|-------|----|------|---------------------------------------|------|-------|----------------|-----------|----------------------------------|-------|
| 15 | Diagnosis | ASXL1  | NM_015338.6(ASXL1)<br>:c.1900_1922del<br>p.E635fs*14 |             | COSM36165 | + | Exon 13            | Indel | 4  | 796  | AGAGAGG<br>CGGCCA<br>CCACTG<br>CCAT-> | 28   | chr20 | chr20:31022415 | 31022415  | AGAGA<br>GGCGG<br>CCACC<br>ACTGC |       |
| 15 | Relapse   | SF3B1  | NM_012433.3(SF3B1)<br>:c.2098A>G p.K700E             |             | COSM84677 | - | Exon 15            | SNV   | 37 | 3690 | A->G                                  | 1369 | chr2  | chr2:198266834 | 198266834 | T                                | C     |
| 15 | Relapse   | ASXL1  | NM_015338.6(ASXL1)<br>:c.1934dupG                    |             |           | + | Exon 13            | Indel | 4  | 1111 | T->TG                                 | 42   | chr20 | chr20:31022449 | 31022449  | T                                | TG    |
| 15 | Relapse   | ASXL1  | NM_015338.6(ASXL1)<br>:c.1900_1922del<br>p.E635fs*14 |             | COSM36165 | + | Exon 13            | Indel | 2  | 1048 | AGAGAGG<br>CGGCCA<br>CCACTG<br>CCAT-> | 25   | chr20 | chr20:31022415 | 31022415  | AGAGA<br>GGCGG<br>CCACC<br>ACTGC |       |
| 15 | Relapse   | NF1    | NM_001042492.3(NF1)<br>:c.2033dupC                   |             |           | + | Exon 18            | Indel | 18 | 1291 | G->GC                                 | 227  | chr17 | chr17:29553484 | 29553484  | G                                | GC    |
| 15 | Relapse   | TP53   | NM_000546.5(TP53)<br>:c.587G>C p.R196P               |             | COSM43814 | - | Exon 6             | SNV   | 70 | 3823 | G->C                                  | 2683 | chr17 | chr17:7578262  | 7578262   | C                                | G     |
| 15 | Relapse   | BRINP3 | NM_199051.3(BRINP3)<br>:c.107C>T p.S36L              |             |           | - | Exon 2             | SNV   | 5  | 3724 | C->T                                  | 193  | chr1  | chr1:190423914 | 190423914 | G                                | A     |
| 15 | Relapse   | NF1    | NM_001042492.3(NF1)<br>:c.6669C>A                    |             |           | + | Exon 44            | SNV   | 42 | 1867 | C->A                                  | 775  | chr17 | chr17:29664863 | 29664863  | C                                | A     |
| 16 | Diagnosis | IDH1   | NM_005896.3(IDH1)<br>:c.394C>T p.R132C               | rs121913499 | COSM28747 | - | Exon 4             | SNV   | 42 | 1991 | C->T                                  | 839  | chr2  | chr2:209113113 | 209113113 | G                                | A     |
| 16 | Diagnosis | NRAS   | NM_002524.5(NRAS)<br>:c.35G>C p.G12A                 | rs121913237 | COSM565   | - | Exon 2             | SNV   | 32 | 3323 | G->C                                  | 1075 | chr1  | chr1:115258747 | 115258747 | C                                | G     |
| 16 | Diagnosis | NRAS   | NM_002524.5(NRAS)<br>:c.37G>C p.G13R                 | rs121434595 | COSM569   | - | Exon 2             | SNV   | 1  | 3334 | G->C                                  | 34   | chr1  | chr1:115258745 | 115258745 | C                                | G     |
| 16 | Diagnosis | NPM1   | NM_002520.6(NPM1)<br>:c.860_863dupTCTG               |             |           | + | Exon 11            | Indel | 43 | 1459 | G-><br>GTCTG                          | 625  | chr5  | chr5:170837547 | 170837547 | G                                | GTCTG |
| 16 | Diagnosis | GATA2  | NM_032638.5(GATA2)<br>:c.837_838insAA                |             |           | - | Exon 3             | Indel | 1  | 4549 | ->AA                                  | 61   | chr3  | chr3:128204604 | 128204604 | G                                | GTT   |
| 16 | Relapse   | NRAS   | NM_002524.5(NRAS)<br>:c.35G>C p.G12A                 | rs121913237 | COSM565   | - | Exon 2             | SNV   | 3  | 3550 | G->C                                  | 120  | chr1  | chr1:115258747 | 115258747 | C                                | G     |
| 16 | Relapse   | NRAS   | NM_002524.5(NRAS)<br>:c.37G>C p.G13R                 | rs121434595 | COSM569   | - | Exon 2             | SNV   | 5  | 3529 | G->C                                  | 159  | chr1  | chr1:115258745 | 115258745 | C                                | G     |
| 16 | Relapse   | NPM1   | NM_002520.6(NPM1)<br>:c.860_863dupTCTG               |             |           | + | Exon 11            | Indel | 43 | 1552 | G-><br>GTCTG                          | 675  | chr5  | chr5:170837547 | 170837547 | G                                | GTCTG |
| 16 | Relapse   | IDH1   | NM_005896.3(IDH1)<br>:c.394C>T p.R132C               | rs121913499 | COSM28747 | - | Exon 4             | SNV   | 44 | 1664 | C->T                                  | 724  | chr2  | chr2:209113113 | 209113113 | G                                | A     |
| 17 | Diagnosis | BCOR   | NM_017745.6(BCOR)<br>:c.2190dupA                     |             |           | - | Exon 4             | Indel | 67 | 1180 | ->A                                   | 791  | chrX  | chrX:39932409  | 39932409  | A                                | AT    |
| 17 | Diagnosis | DNMT3A | NM_022552.4(DNMT3A)<br>:c.2645G>A                    | rs147001633 | COSM52944 | - | Exon 23            | SNV   | 31 | 2372 | G->A                                  | 745  | chr2  | chr2:25457242  | 25457242  | C                                | T     |
| 17 | Diagnosis | WT1    | NM_024426.6(WT1):c.<br>.1354+1G>C p.?                |             |           | - | Splice?<br>(Intron | SNV   | 28 | 2663 | G->C                                  | 753  | chr11 | chr11:32414211 | 32414211  | C                                | G     |

|    |           |        |                                               |             |            |   |                 |       |    |      |                                       |     |       |                |           |                                  |    |
|----|-----------|--------|-----------------------------------------------|-------------|------------|---|-----------------|-------|----|------|---------------------------------------|-----|-------|----------------|-----------|----------------------------------|----|
| 17 | Diagnosis | BCORL1 | NM_021946.4(BCORL1):c.2305A>T                 |             |            | + | Exon 3          | SNV   | 64 | 1296 | A->T                                  | 835 | chrX  | chrX:129149053 | 129149053 | A                                | T  |
| 17 | Diagnosis | NRAS   | NM_002524.5(NRAS):c.35G>A p.G12D              | rs121913237 | COSM564    | - | Exon 2          | SNV   | 32 | 2811 | G->A                                  | 892 | chr1  | chr1:115258747 | 115258747 | C                                | T  |
| 17 | Diagnosis | IDH1   | NM_005896.3(IDH1):c.395G>T p.R132L            |             | COSM28750  | - | Exon 4          | SNV   | 28 | 1682 | G->T                                  | 476 | chr2  | chr2:209113112 | 209113112 | C                                | A  |
| 17 | Remission | IDH1   | NM_005896.3(IDH1):c.395G>T p.R132L            |             | COSM28750  | - | Exon 4          | SNV   | 33 | 1562 | G->T                                  | 517 | chr2  | chr2:209113112 | 209113112 | C                                | A  |
| 17 | Remission | WT1    | NM_024426.6(WT1):c.1354+1G>C p.?              |             |            | - | Splice? (Intron | SNV   | 25 | 1857 | G->C                                  | 456 | chr11 | chr11:32414211 | 32414211  | C                                | G  |
| 17 | Remission | NRAS   | NM_002524.5(NRAS):c.35G>A p.G12D              | rs121913237 | COSM564    | - | Exon 2          | SNV   | 30 | 3005 | G->A                                  | 907 | chr1  | chr1:115258747 | 115258747 | C                                | T  |
| 17 | Remission | BCORL1 | NM_021946.4(BCORL1):c.2305A>T                 |             |            | + | Exon 3          | SNV   | 61 | 1294 | A->T                                  | 786 | chrX  | chrX:129149053 | 129149053 | A                                | T  |
| 17 | Remission | BCOR   | NM_017745.6(BCOR):c.2190dupA                  |             |            | - | Exon 4          | Indel | 60 | 1098 | ->A                                   | 662 | chrX  | chrX:39932409  | 39932409  | A                                | AT |
| 17 | Remission | DNMT3A | NM_022552.4(DNMT3A):c.2645G>A                 | rs147001633 | COSM52944  | - | Exon 23         | SNV   | 32 | 2066 | G->A                                  | 652 | chr2  | chr2:25457242  | 25457242  | C                                | T  |
| 18 | Diagnosis | RUNX1  | NM_001754.4(RUNX1):c.611G>A p.R204Q           |             | COSM24731  | - | Exon 6          | SNV   | 29 | 1299 | G->A                                  | 379 | chr21 | chr21:36231773 | 36231773  | C                                | T  |
| 18 | Diagnosis | STAT3  | NM_139276.2(STAT3):c.1940A>T p.N647I          |             |            | - | Exon 21         | SNV   | 3  | 2127 | A->T                                  | 55  | chr17 | chr17:40474461 | 40474461  | T                                | A  |
| 18 | Diagnosis | SRSF2  | NM_003016.4(SRSF2):c.284_307del p.P95_R102del |             |            | - | Exon 1          | Indel | 24 | 1811 | CCCCGG<br>ACTCAC<br>CCACAG<br>CCGCC-> | 431 | chr17 | chr17:74732936 | 74732936  | GGCGG<br>CTGTG<br>GTGTG<br>AGTCC |    |
| 18 | Diagnosis | IDH1   | NM_005896.3(IDH1):c.395G>A p.R132H            | rs121913500 | COSM28746  | - | Exon 4          | SNV   | 17 | 1846 | G->A                                  | 317 | chr2  | chr2:209113112 | 209113112 | C                                | T  |
| 18 | Diagnosis | ASXL1  | NM_015338.6(ASXL1):c.1749G>A p.W583*          |             | COSM133567 | + | Exon 13         | SNV   | 3  | 1670 | G->A                                  | 57  | chr20 | chr20:31022264 | 31022264  | G                                | A  |
| 19 | Diagnosis | IDH1   | NM_005896.3(IDH1):c.394C>T p.R132C            | rs121913499 | COSM28747  | - | Exon 4          | SNV   | 6  | 1428 | C->T                                  | 90  | chr2  | chr2:209113113 | 209113113 | G                                | A  |
| 20 | Diagnosis | SRSF2  | NM_003016.4(SRSF2):c.284C>A p.P95H            |             |            | - | Exon 1          | SNV   | 45 | 1287 | C->A                                  | 573 | chr17 | chr17:74732959 | 74732959  | G                                | T  |
| 20 | Diagnosis | IDH1   | NM_005896.3(IDH1):c.394C>T p.R132C            | rs121913499 | COSM28747  | - | Exon 4          | SNV   | 42 | 1643 | C->T                                  | 695 | chr2  | chr2:209113113 | 209113113 | G                                | A  |
| 20 | Diagnosis | ASXL1  | NM_015338.6(ASXL1):c.1934dupG                 |             |            | + | Exon 13         | Indel | 36 | 1180 | T->TG                                 | 424 | chr20 | chr20:31022449 | 31022449  | T                                | TG |
| 20 | Diagnosis | BRAF   | NM_004333.6(BRAF):c.1406G>C p.G469A           | rs121913355 | COSM460    | - | Exon 11         | SNV   | 2  | 1319 | G->C                                  | 28  | chr7  | chr7:140481402 | 140481402 | C                                | G  |
| 20 | Diagnosis | TET2   | NM_001127208.2(TET2):c.4317del                |             |            | + | Exon 10         | Indel | 47 | 668  | A->                                   | 313 | chr4  | chr4:106193855 | 106193855 | A                                |    |
| 20 | Diagnosis | TET2   | NM_001127208.2(TET2):c.4627A>T                |             |            | + | Exon 11         | SNV   | 46 | 1866 | A->T                                  | 857 | chr4  | chr4:106196294 | 106196294 | A                                | T  |



|    |           |       |                                     |             |           |   |         |       |    |      |       |     |       |                |           |   |    |
|----|-----------|-------|-------------------------------------|-------------|-----------|---|---------|-------|----|------|-------|-----|-------|----------------|-----------|---|----|
| 20 | Remission | SRSF2 | NM_003016.4(SRSF2):c.284C>A p.P95H  |             |           | - | Exon 1  | SNV   | 4  | 1569 | C->A  | 63  | chr17 | chr17:74732959 | 74732959  | G | T  |
| 20 | Remission | ASXL1 | NM_015338.6(ASXL1):c.1934dupG       |             |           | + | Exon 13 | Indel | 19 | 1051 | T->TG | 199 | chr20 | chr20:31022449 | 31022449  | T | TG |
| 20 | Remission | BRAF  | NM_004333.6(BRAF):c.1406G>C p.G469A | rs121913355 | COSM460   | - | Exon 11 | SNV   | 25 | 623  | G->C  | 157 | chr7  | chr7:140481402 | 140481402 | C | G  |
| 20 | Remission | IDH1  | NM_005896.3(IDH1):c.394C>T p.R132C  | rs121913499 | COSM28747 | - | Exon 4  | SNV   | 3  | 1483 | C->T  | 39  | chr2  | chr2:209113113 | 209113113 | G | A  |
| 20 | Remission | TET2  | NM_001127208.2(TE T2):c.4627A>T     |             |           | + | Exon 11 | SNV   | 39 | 1087 | A->T  | 429 | chr4  | chr4:106196294 | 106196294 | A | T  |
| 20 | Remission | TET2  | NM_001127208.2(TE T2):c.4317del     |             |           | + | Exon 10 | Indel | 41 | 329  | A->   | 136 | chr4  | chr4:106193855 | 106193855 | A |    |
| 20 | Remission | ASXL1 | NM_015338.6(ASXL1):c.1934dupG       |             |           | + | Exon 13 | Indel | 24 | 566  | T->TG | 136 | chr20 | chr20:31022449 | 31022449  | T | TG |
| 20 | Remission | BRAF  | NM_004333.6(BRAF):c.1406G>C p.G469A | rs121913355 | COSM460   | - | Exon 11 | SNV   | 30 | 305  | G->C  | 93  | chr7  | chr7:140481402 | 140481402 | C | G  |
| 20 | Remission | TET2  | NM_001127208.2(TE T2):c.4317del     |             |           | + | Exon 10 | Indel | 38 | 288  | A->   | 108 | chr4  | chr4:106193855 | 106193855 | A |    |
| 20 | Remission | TET2  | NM_001127208.2(TE T2):c.4627A>T     |             |           | + | Exon 11 | SNV   | 40 | 945  | A->T  | 378 | chr4  | chr4:106196294 | 106196294 | A | T  |
| 20 | Remission | TET2  | NM_001127208.2(TE T2):c.4627A>T     |             |           | + | Exon 11 | SNV   | 32 | 1942 | A->T  | 629 | chr4  | chr4:106196294 | 106196294 | A | T  |
| 20 | Remission | RUNX1 | NM_001754.4(RUNX1):c.1240dupT       |             |           | - | Exon 9  | Indel | 10 | 2664 | ->T   | 262 | chr21 | chr21:36164635 | 36164635  | G | GA |
| 20 | Remission | TET2  | NM_001127208.2(TE T2):c.4317del     |             |           | + | Exon 10 | Indel | 31 | 410  | A->   | 127 | chr4  | chr4:106193855 | 106193855 | A |    |
| 20 | Remission | BRAF  | NM_004333.6(BRAF):c.1406G>C p.G469A | rs121913355 | COSM460   | - | Exon 11 | SNV   | 9  | 602  | G->C  | 56  | chr7  | chr7:140481402 | 140481402 | C | G  |
| 20 | Remission | ASXL1 | NM_015338.6(ASXL1):c.1934dupG       |             |           | + | Exon 13 | Indel | 18 | 1271 | T->TG | 232 | chr20 | chr20:31022449 | 31022449  | T | TG |
| 20 | Remission | SRSF2 | NM_003016.4(SRSF2):c.284C>A p.P95H  |             |           | - | Exon 1  | SNV   | 21 | 1897 | C->A  | 396 | chr17 | chr17:74732959 | 74732959  | G | T  |
| 20 | Relapse   | SRSF2 | NM_003016.4(SRSF2):c.284C>A p.P95H  |             |           | - | Exon 1  | SNV   | 42 | 1899 | C->A  | 799 | chr17 | chr17:74732959 | 74732959  | G | T  |
| 20 | Relapse   | ASXL1 | NM_015338.6(ASXL1):c.1934dupG       |             |           | + | Exon 13 | Indel | 30 | 1410 | T->TG | 429 | chr20 | chr20:31022449 | 31022449  | T | TG |
| 20 | Relapse   | TET2  | NM_001127208.2(TE T2):c.4317del     |             |           | + | Exon 10 | Indel | 43 | 652  | A->   | 278 | chr4  | chr4:106193855 | 106193855 | A |    |
| 20 | Relapse   | RUNX1 | NM_001754.4(RUNX1):c.1240dupT       |             |           | - | Exon 9  | Indel | 16 | 2911 | ->T   | 457 | chr21 | chr21:36164635 | 36164635  | G | GA |
| 20 | Relapse   | TET2  | NM_001127208.2(TE T2):c.4627A>T     |             |           | + | Exon 11 | SNV   | 45 | 1660 | A->T  | 743 | chr4  | chr4:106196294 | 106196294 | A | T  |
| 20 | Relapse   | ASXL1 | NM_015338.6(ASXL1):c.1934dupG       |             |           |   | Exon 13 | Indel | 8  | 531  | T->TG | 40  | chr20 | chr20:31022449 | 31022449  | T | TG |

|    |           |        |                                          |             |           |   |         |       |    |      |        |      |       |                |           |   |     |
|----|-----------|--------|------------------------------------------|-------------|-----------|---|---------|-------|----|------|--------|------|-------|----------------|-----------|---|-----|
| 20 | Relapse   | SRSF2  | NM_003016.4(SRSF2):c.284C>A p.P95H       |             |           |   | Exon 1  | SNV   | 48 | 625  | C->A   | 301  | chr17 | chr17:74732959 | 74732959  | G | T   |
| 20 | Relapse   | TET2   | NM_001127208.2(TE T2):c.4317del          |             |           |   | Exon 10 | Indel | 46 | 427  | A->    | 196  | chr4  | chr4:106193855 | 106193855 | A |     |
| 20 | Relapse   | TET2   | NM_001127208.2(TE T2):c.4627A>T          |             |           |   | Exon 11 | SNV   | 45 | 761  | A->T   | 344  | chr4  | chr4:106196294 | 106196294 | A | T   |
| 20 | Relapse   | RUNX1  | NM_001754.4(RUNX 1):c.1240dupT           |             |           |   | Exon 9  | Indel | 69 | 1024 | ->T    | 708  | chr21 | chr21:36164635 | 36164635  | G | GA  |
| 21 | Diagnosis | DNMT3A | NM_022552.4(DNMT 3A):c.2645G>A           | rs147001633 | COSM52944 | - | Exon 23 | SNV   | 40 | 3545 | G->A   | 1419 | chr2  | chr2:25457242  | 25457242  | C | T   |
| 21 | Diagnosis | PHF6   | NM_032458.3(PHF6): c.903C>G p.Y301*      |             |           | + | Exon 9  | SNV   | 13 | 2031 | C->G   | 263  | chrX  | chrX:133551267 | 133551267 | C | G   |
| 21 | Diagnosis | IDH1   | NM_005896.3(IDH1): c.394C>T p.R132C      | rs121913499 | COSM28747 | - | Exon 4  | SNV   | 40 | 2576 | C->T   | 1031 | chr2  | chr2:209113113 | 209113113 | G | A   |
| 21 | Diagnosis | BCOR   | NM_017745.6(BCOR ):c.3071C>A p.S1024*    |             |           | - | Exon 6  | SNV   | 11 | 2829 | C->A   | 307  | chrX  | chrX:39930393  | 39930393  | G | T   |
| 21 | Diagnosis | PHF6   | NM_032458.3(PHF6): c.947_948insAG        |             |           | + | Exon 9  | Indel | 24 | 3173 | A->AAG | 779  | chrX  | chrX:133551312 | 133551312 | A | AAG |
| 22 | Diagnosis | IDH1   | NM_005896.3(IDH1): c.394C>T p.R132C      | rs121913499 | COSM28747 | - | Exon 4  | SNV   | 5  | 1558 | C->T   | 84   | chr2  | chr2:209113113 | 209113113 | G | A   |
| 22 | Diagnosis | ASXL1  | NM_015338.6(ASXL1 ):c.2926C>T p.Q976*    |             |           | + | Exon 13 | SNV   | 5  | 4478 | C->T   | 242  | chr20 | chr20:31023441 | 31023441  | C | T   |
| 22 | Diagnosis | CSF3R  | NM_156039.3(CSF3R ):c.2326C>T p.Q776*    |             |           | - | Exon 17 | SNV   | 4  | 1810 | C->T   | 70   | chr1  | chr1:36932224  | 36932224  | G | A   |
| 22 | Diagnosis | RUNX1  | NM_001754.4(RUNX 1):c.602G>A p.R201Q     | rs74315450  | COSM24805 | - | Exon 6  | SNV   | 4  | 1358 | G->A   | 57   | chr21 | chr21:36231782 | 36231782  | C | T   |
| 22 | Diagnosis | U2AF1  | NM_006758.2(U2AF1 ):c.470A>G p.Q157R     |             |           | - | Exon 6  | SNV   | 4  | 3417 | A->G   | 148  | chr21 | chr21:44514777 | 44514777  | T | C   |
| 22 | Remission | CSF3R  | NM_156039.3(CSF3R ):c.2326C>T p.Q776*    |             |           | - | Exon 17 | SNV   | 1  | 2324 | C->T   | 33   | chr1  | chr1:36932224  | 36932224  | G | A   |
| 22 | Remission | ASXL1  | NM_015338.6(ASXL1 ):c.2926C>T p.Q976*    |             |           | + | Exon 13 | SNV   | 2  | 5404 | C->T   | 103  | chr20 | chr20:31023441 | 31023441  | C | T   |
| 22 | Remission | U2AF1  | NM_006758.2(U2AF1 ):c.470A>G p.Q157R     |             |           | - | Exon 6  | SNV   | 2  | 3727 | A->G   | 74   | chr21 | chr21:44514777 | 44514777  | T | C   |
| 22 | Remission | ASXL1  | NM_015338.6(ASXL1 ):c.2487del p.A830fs*8 |             |           | + | Exon 13 | Indel | 1  | 2544 | A->    | 26   | chr20 | chr20:31023002 | 31023002  | A |     |
| 22 | Remission | RUNX1  | NM_001754.4(RUNX 1):c.602G>A p.R201Q     | rs74315450  | COSM24805 | - | Exon 6  | SNV   | 1  | 1316 | G->A   | 17   | chr21 | chr21:36231782 | 36231782  | C | T   |
| 23 | Diagnosis | ZRSR2  | NM_005089.3(ZRSR2 ):c.397G>T p.E133*     |             |           | + | Exon 5  | SNV   | 69 | 77   | G->T   | 53   | chrX  | chrX:15822318  | 15822318  | G | T   |
| 23 | Diagnosis | ETNK1  | NM_018638.5(ETNK1 ):c.464A>T p.N155I     |             |           | + | Exon 3  | SNV   | 5  | 5269 | A->T   | 828  | chr12 | chr12:22811995 | 22811995  | A | T   |
| 23 | Diagnosis | ASXL1  | NM_015338.6(ASXL1 ):c.1934dupG           |             |           | + | Exon 13 | Indel | 9  | 1272 | T->TG  | 122  | chr20 | chr20:31022449 | 31022449  | T | TG  |

|    |           |        |                                      |             |           |   |         |       |    |      |       |      |       |                |           |   |      |
|----|-----------|--------|--------------------------------------|-------------|-----------|---|---------|-------|----|------|-------|------|-------|----------------|-----------|---|------|
| 23 | Diagnosis | ETNK1  | NM_018638.5(ETNK1):c.464A>G p.N155S  |             |           | + | Exon 3  | SNV   | 11 | 5269 | A->G  | 828  | chr12 | chr12:22811995 | 22811995  | A | G    |
| 23 | Diagnosis | IDH1   | NM_005896.3(IDH1):c.394C>T p.R132C   | rs121913499 | COSM28747 | - | Exon 4  | SNV   | 8  | 1948 | C->T  | 158  | chr2  | chr2:209113113 | 209113113 | G | A    |
| 23 | Diagnosis | ASXL1  | NM_015338.6(ASXL1):c.2077C>T p.R693* |             | COSM51388 | + | Exon 13 | SNV   | 3  | 2653 | C->T  | 68   | chr20 | chr20:31022592 | 31022592  | C | T    |
| 24 | Diagnosis | FLT3   | NM_004119.3(FLT3):c.2504A>T p.D835V  | rs121909646 | COSM784   | - | Exon 20 | SNV   | 1  | 2369 | A->T  | 33   | chr13 | chr13:28592641 | 28592641  | T | A    |
| 24 | Diagnosis | KIT    | NM_000222.2(KIT):c.2447A>T p.D816V   | rs121913507 | COSM1314  | + | Exon 17 | SNV   | 36 | 2516 | A->T  | 918  | chr4  | chr4:55599321  | 55599321  | A | T    |
| 24 | Diagnosis | NRAS   | NM_002524.5(NRAS):c.35G>A p.G12D     | rs121913237 | COSM564   | - | Exon 2  | SNV   | 1  | 4033 | G->A  | 51   | chr1  | chr1:115258747 | 115258747 | C | T    |
| 24 | Diagnosis | NRAS   | NM_002524.5(NRAS):c.38G>A p.G13D     | rs121434596 | COSM573   | - | Exon 2  | SNV   | 2  | 4040 | G->A  | 62   | chr1  | chr1:115258744 | 115258744 | C | T    |
| 24 | Diagnosis | BCOR   | NM_017745.6(BCOR):c.4537C>T p.R1513* |             |           | - | Exon 12 | SNV   | 4  | 903  | C->T  | 32   | chrX  | chrX:39914723  | 39914723  | G | A    |
| 24 | Diagnosis | DNMT3A | NM_022552.4(DNMT3A):c.2120G>A        |             |           | - | Exon 18 | SNV   | 95 | 3009 | G->A  | 2845 | chr2  | chr2:25463562  | 25463562  | C | T    |
| 24 | Diagnosis | IDH1   | NM_005896.3(IDH1):c.394C>T p.R132C   | rs121913499 | COSM28747 | - | Exon 4  | SNV   | 46 | 2194 | C->T  | 1013 | chr2  | chr2:209113113 | 209113113 | G | A    |
| 24 | Diagnosis | BRINP3 | NM_199051.3(BRINP3):c.1399T>C        |             |           | - | Exon 8  | SNV   | 39 | 1185 | T->C  | 457  | chr1  | chr1:190068050 | 190068050 | A | G    |
| 24 | Diagnosis | BCOR   | NM_017745.6(BCOR):c.1201G>T p.E401*  |             |           | - | Exon 4  | SNV   | 4  | 755  | G->T  | 27   | chrX  | chrX:39933398  | 39933398  | C | A    |
| 24 | Remission | DNMT3A | NM_022552.4(DNMT3A):c.2120G>A        |             |           | - | Exon 18 | SNV   | 29 | 4222 | G->A  | 1237 | chr2  | chr2:25463562  | 25463562  | C | T    |
| 24 | Remission | NF1    | NM_001042492.3(NF1):c.5503C>T        |             |           | + | Exon 38 | SNV   | 4  | 5685 | C->T  | 228  | chr17 | chr17:29654751 | 29654751  | C | T    |
| 25 | Diagnosis | JAK2   | NM_004972.3(JAK2):c.1849G>T p.V617F  | rs77375493  | COSM12600 | + | Exon 14 | SNV   | 57 | 2174 | G->T  | 1235 | chr9  | chr9:5073770   | 5073770   | G | T    |
| 25 | Diagnosis | IDH2   | NM_002168.3(IDH2):c.419G>A p.R140Q   | rs121913502 | COSM41590 | - | Exon 4  | SNV   | 18 | 3960 | G->A  | 713  | chr15 | chr15:90631934 | 90631934  | C | T    |
| 25 | Diagnosis | IDH1   | NM_005896.3(IDH1):c.395G>A p.R132H   | rs121913500 | COSM28746 | - | Exon 4  | SNV   | 29 | 1299 | G->A  | 374  | chr2  | chr2:209113112 | 209113112 | C | T    |
| 25 | Diagnosis | SRSF2  | NM_003016.4(SRSF2):c.278_279insGCG   |             |           | - | Exon 1  | Indel | 48 | 1696 | ->GCG | 810  | chr17 | chr17:74732965 | 74732965  | C | CCGC |
| 25 | Remission | JAK2   | NM_004972.3(JAK2):c.1849G>T p.V617F  | rs77375493  | COSM12600 | + | Exon 14 | SNV   | 5  | 3942 | G->T  | 208  | chr9  | chr9:5073770   | 5073770   | G | T    |
| 25 | Remission | IDH1   | NM_005896.3(IDH1):c.395G>A p.R132H   | rs121913500 | COSM28746 | - | Exon 4  | SNV   | 6  | 1658 | G->A  | 94   | chr2  | chr2:209113112 | 209113112 | C | T    |
| 25 | Remission | SRSF2  | NM_003016.4(SRSF2):c.278_279insGCG   |             |           | - | Exon 1  | Indel | 6  | 2323 | ->GCG | 134  | chr17 | chr17:74732965 | 74732965  | C | CCGC |
| 26 | Diagnosis | DNMT3A | NM_022552.4(DNMT3A):c.866G>A         |             |           | - | Exon 8  | SNV   | 18 | 1575 | G->A  | 284  | chr2  | chr2:25470608  | 25470608  | C | T    |

|    |           |        |                                      |             |           |   |                  |       |    |      |          |      |       |                 |           |   |       |
|----|-----------|--------|--------------------------------------|-------------|-----------|---|------------------|-------|----|------|----------|------|-------|-----------------|-----------|---|-------|
| 26 | Diagnosis | U2AF1  | NM_006758.2(U2AF1):c.470A>C p.Q157P  |             |           | - | Exon 6           | SNV   | 21 | 5828 | A->C     | 1236 | chr21 | chr21:44514777  | 44514777  | T | G     |
| 26 | Diagnosis | IDH1   | NM_005896.3(IDH1):c.394C>T p.R132C   | rs121913499 | COSM28747 | - | Exon 4           | SNV   | 23 | 2818 | C->T     | 640  | chr2  | chr2:209113113  | 209113113 | G | A     |
| 26 | Diagnosis | ASXL1  | NM_015338.6(ASXL1):c.1934dupG        |             |           | + | Exon 13          | Indel | 13 | 1805 | T->TG    | 243  | chr20 | chr20:31022449  | 31022449  | T | TG    |
| 27 | Diagnosis | IDH1   | NM_005896.3(IDH1):c.394C>T p.R132C   | rs121913499 | COSM28747 | - | Exon 4           | SNV   | 39 | 2173 | C->T     | 854  | chr2  | chr2:209113113  | 209113113 | G | A     |
| 27 | Diagnosis | DNMT3A | NM_022552.4(DNMT3A):c.2645G>A        | rs147001633 | COSM52944 | - | Exon 23          | SNV   | 38 | 2810 | G->A     | 1061 | chr2  | chr2:25457242   | 25457242  | C | T     |
| 28 | Diagnosis | BCOR   | NM_017745.6(BCOR):c.2742dupT p.G915* |             |           | - | Exon 4           | Indel | 46 | 1657 | ->T      | 768  | chrX  | chrX:39931857   | 39931857  | A | AA    |
| 28 | Diagnosis | IDH1   | NM_005896.3(IDH1):c.394C>T p.R132C   | rs121913499 | COSM28747 | - | Exon 4           | SNV   | 45 | 2135 | C->T     | 970  | chr2  | chr2:209113113  | 209113113 | G | A     |
| 28 | Diagnosis | U2AF1  | NM_006758.2(U2AF1):c.101C>T p.S34F   |             |           | - | Exon 2           | SNV   | 51 | 860  | C->T     | 435  | chr21 | chr21:44524456  | 44524456  | G | A     |
| 28 | Remission | U2AF1  | NM_006758.2(U2AF1):c.101C>T p.S34F   |             |           | - | Exon 2           | SNV   | 47 | 657  | C->T     | 310  | chr21 | chr21:44524456  | 44524456  | G | A     |
| 28 | Remission | IDH1   | NM_005896.3(IDH1):c.394C>T p.R132C   | rs121913499 | COSM28747 | - | Exon 4           | SNV   | 39 | 1714 | C->T     | 668  | chr2  | chr2:209113113  | 209113113 | G | A     |
| 28 | Remission | BCOR   | NM_017745.6(BCOR):c.2742dupT p.G915* |             |           | - | Exon 4           | Indel | 41 | 1658 | ->T      | 679  | chrX  | chrX:39931857   | 39931857  | A | AA    |
| 28 | Remission | DNMT3A | NM_022552.4(DNMT3A):c.1122+2T>G p.?  |             |           | - | Splice? (Intron) | SNV   | 37 | 1570 | T->G     | 588  | chr2  | chr2:25469918   | 25469918  | A | C     |
| 29 | Diagnosis | PTPN11 | NM_002834.4(PTPN11):c.215C>A p.A72D  |             | COSM13035 | + | Exon 3           | SNV   | 1  | 3736 | C->A     | 53   | chr12 | chr12:112888199 | 112888199 | C | A     |
| 29 | Diagnosis | NPM1   | NM_002520.6(NPM1):c.863_864insTATG   |             | COSM20815 | + | Exon 11          | Indel | 44 | 2202 | C->CTATG | 976  | chr5  | chr5:170837548  | 170837548 | C | CTATG |
| 29 | Diagnosis | IDH1   | NM_005896.3(IDH1):c.395G>A p.R132H   | rs121913500 | COSM28746 | - | Exon 4           | SNV   | 40 | 3108 | G->A     | 1246 | chr2  | chr2:209113112  | 209113112 | C | T     |
| 29 | Diagnosis | NRAS   | NM_002524.5(NRAS):c.35G>A p.G12D     | rs121913237 | COSM564   | - | Exon 2           | SNV   | 36 | 5700 | G->A     | 2072 | chr1  | chr1:115258747  | 115258747 | C | T     |
| 29 | Diagnosis | NF1    | NM_001042492.3(NF1):c.1700T>G        |             |           | + | Exon 15          | SNV   | 12 | 548  | T->G     | 68   | chr17 | chr17:29548926  | 29548926  | T | G     |
| 29 | Remission | IDH1   | NM_005896.3(IDH1):c.395G>A p.R132H   | rs121913500 | COSM28746 | - | Exon 4           | SNV   | 14 | 1380 | G->A     | 199  | chr2  | chr2:209113112  | 209113112 | C | T     |
| 29 | Remission | NPM1   | NM_002520.6(NPM1):c.863_864insTATG   |             | COSM20815 | + | Exon 11          | Indel | 14 | 1035 | C->CTATG | 146  | chr5  | chr5:170837548  | 170837548 | C | CTATG |
| 29 | Remission | NF1    | NM_001042492.3(NF1):c.1700T>G        |             |           | + | Exon 15          | SNV   | 6  | 287  | T->G     | 16   | chr17 | chr17:29548926  | 29548926  | T | G     |
| 29 | Remission | DNMT3A | NM_022552.4(DNMT3A):c.2723A>G        |             |           | - | Exon 23          | SNV   | 1  | 1943 | A->G     | 28   | chr2  | chr2:25457164   | 25457164  | T | C     |
| 29 | Remission | NF1    | NM_001042492.3(NF1):c.1700T>G        |             |           | + | Exon 15          | SNV   | 8  | 303  | T->G     | 24   | chr17 | chr17:29548926  | 29548926  | T | G     |

|    |           |        |                                    |             |            |   |                  |     |    |      |      |      |       |                |           |   |   |
|----|-----------|--------|------------------------------------|-------------|------------|---|------------------|-----|----|------|------|------|-------|----------------|-----------|---|---|
| 29 | Remission | NRAS   | NM_002524.5(NRAS):c.35G>A p.G12D   | rs121913237 | COSM564    | - | Exon 2           | SNV | 15 | 2877 | G->A | 425  | chr1  | chr1:115258747 | 115258747 | C | T |
| 31 | Diagnosis | DNMT3A | NM_022552.4(DNMT3A):c.1792C>T      |             | COSM133736 | - | Exon 15          | SNV | 16 | 4044 | C->T | 657  | chr2  | chr2:25467083  | 25467083  | G | A |
| 31 | Diagnosis | DNMT3A | NM_022552.4(DNMT3A):c.2644C>T      |             | COSM53042  | - | Exon 23          | SNV | 15 | 4029 | C->T | 610  | chr2  | chr2:25457243  | 25457243  | G | A |
| 31 | Diagnosis | IDH1   | NM_005896.3(IDH1):c.394C>G p.R132G |             | COSM28749  | - | Exon 4           | SNV | 19 | 1636 | C->G | 317  | chr2  | chr2:209113113 | 209113113 | G | C |
| 31 | Remission | DNMT3A | NM_022552.4(DNMT3A):c.2644C>T      |             | COSM53042  | - | Exon 23          | SNV | 3  | 4444 | C->T | 125  | chr2  | chr2:25457243  | 25457243  | G | A |
| 31 | Remission | IDH1   | NM_005896.3(IDH1):c.394C>G p.R132G |             | COSM28749  | - | Exon 4           | SNV | 2  | 3048 | C->G | 57   | chr2  | chr2:209113113 | 209113113 | G | C |
| 32 | Diagnosis | STAT5A | NM_003152.3(STAT5A):c.1423G>A      |             |            | + | Exon 13          | SNV | 23 | 2866 | G->A | 666  | chr17 | chr17:40457670 | 40457670  | G | A |
| 32 | Diagnosis | IDH1   | NM_005896.3(IDH1):c.394C>G p.R132G |             | COSM28749  | - | Exon 4           | SNV | 18 | 2248 | C->G | 396  | chr2  | chr2:209113113 | 209113113 | G | C |
| 32 | Remission | STAT5A | NM_003152.3(STAT5A):c.1423G>A      |             |            | + | Exon 13          | SNV | 9  | 2813 | G->A | 251  | chr17 | chr17:40457670 | 40457670  | G | A |
| 33 | Diagnosis | TP53   | NM_000546.5(TP53):c.524G>A p.R175H | rs28934578  | COSM10648  | - | Exon 5           | SNV | 2  | 7553 | G->A | 129  | chr17 | chr17:7578406  | 7578406   | C | T |
| 33 | Diagnosis | DNMT3A | NM_022552.4(DNMT3A):c.2645G>A      | rs147001633 | COSM52944  | - | Exon 23          | SNV | 26 | 5897 | G->A | 1557 | chr2  | chr2:25457242  | 25457242  | C | T |
| 33 | Diagnosis | IDH1   | NM_005896.3(IDH1):c.394C>G p.R132G |             | COSM28749  | - | Exon 4           | SNV | 30 | 4615 | C->G | 1381 | chr2  | chr2:209113113 | 209113113 | G | C |
| 33 | Diagnosis | STAT5B | NM_012448.4(STAT5B):c.1924A>C      |             |            | - | Exon 16          | SNV | 3  | 6025 | A->C | 153  | chr17 | chr17:40359729 | 40359729  | T | G |
| 33 | Diagnosis | PHF6   | NM_032458.3(PHF6):c.889T>C p.C297R |             |            | + | Exon 9           | SNV | 23 | 2419 | T->C | 558  | chrX  | chrX:133551253 | 133551253 | T | C |
| 33 | Diagnosis | CUX1   | NM_181552.4(CUX1):c.530+2T>C p.?   |             |            | + | Splice? (Intron) | SNV | 10 | 3958 | T->C | 379  | chr7  | chr7:101747741 | 101747741 | T | C |

**Table S7:** CyTOF antibodies utilized.

| Target   | Label | Source       | Cat #      |
|----------|-------|--------------|------------|
| CD34     | 148Nd | eBioscience  | 14-0349-82 |
| CD123    | 145Nd | BD           | 554527     |
| c-kit    | 139La | BioLegend    | 313202     |
| CD38     | 168Er | BioLegend    | 303502     |
| CD33     | 169Tm | DVS-Fluidigm | 3169010B   |
| CD64     | 146Nd | DVS-Fluidigm | 3146006B   |
| CD11b    | 144Nd | DVS-Fluidigm | 3144001B   |
| CD11c    | 150Nd | BioLegend    | 337221     |
| CD13     | 154Sm | BioLegend    | 301702     |
| CD14     | 160Gd | BioLegend    | 301802     |
| CD15     | 163Dy | BioLegend    | 323035     |
| HLA-DR   | 174Yb | BioLegend    | 307602     |
| CD56     | 162Dy | BD           | 559043     |
| CD19     | 143Nd | BioLegend    | 302202     |
| CD71     | 175Lu | DVS-Fluidigm | 3175011B   |
| CD44     | 166Er | DVS-Fluidigm | 3166001B   |
| p-STAT3  | 152Sm | BD           | 612357     |
| p-STAT5  | 147Sm | DVS-Fluidigm | 3147012A   |
| p-AKT    | 159Tb | BD           | 560397     |
| p-ERK1/2 | 167Er | CST          | 4370BF     |
| Bax      | 173Yb | BioLegend    | 633602     |
| Bcl-2    | 158Gd | BioLegend    | 658702     |
| Bcl-xL   | 141Pr | CST          | 2764BF     |
| Mcl-1    | 176Yb | CST          | 94296BF    |
| Ki67     | 172Yb | DVS-Fluidigm | 3172024B   |

**Figure S1: Molecular, cytogenetic, and IDH1 variants across the P1b study population.** (A), Oncoprint of molecular mutations identified at diagnosis in 31 patients enrolled demonstrated a diverse molecular landscape. (B-C), Neither median mutation burden nor *IDH1* VAF was significantly different between included disease types. (D), *IDH1* variants differed across disease types, with R132C mutations most frequent at diagnosis in ND and R/R-AML. *IDH1* R132L and R132S variants were not identified in patients with MDS or MPN. (E), Clonal hierarchy of baseline mutations assessed using bulk myeloid NGS panel on baseline samples.

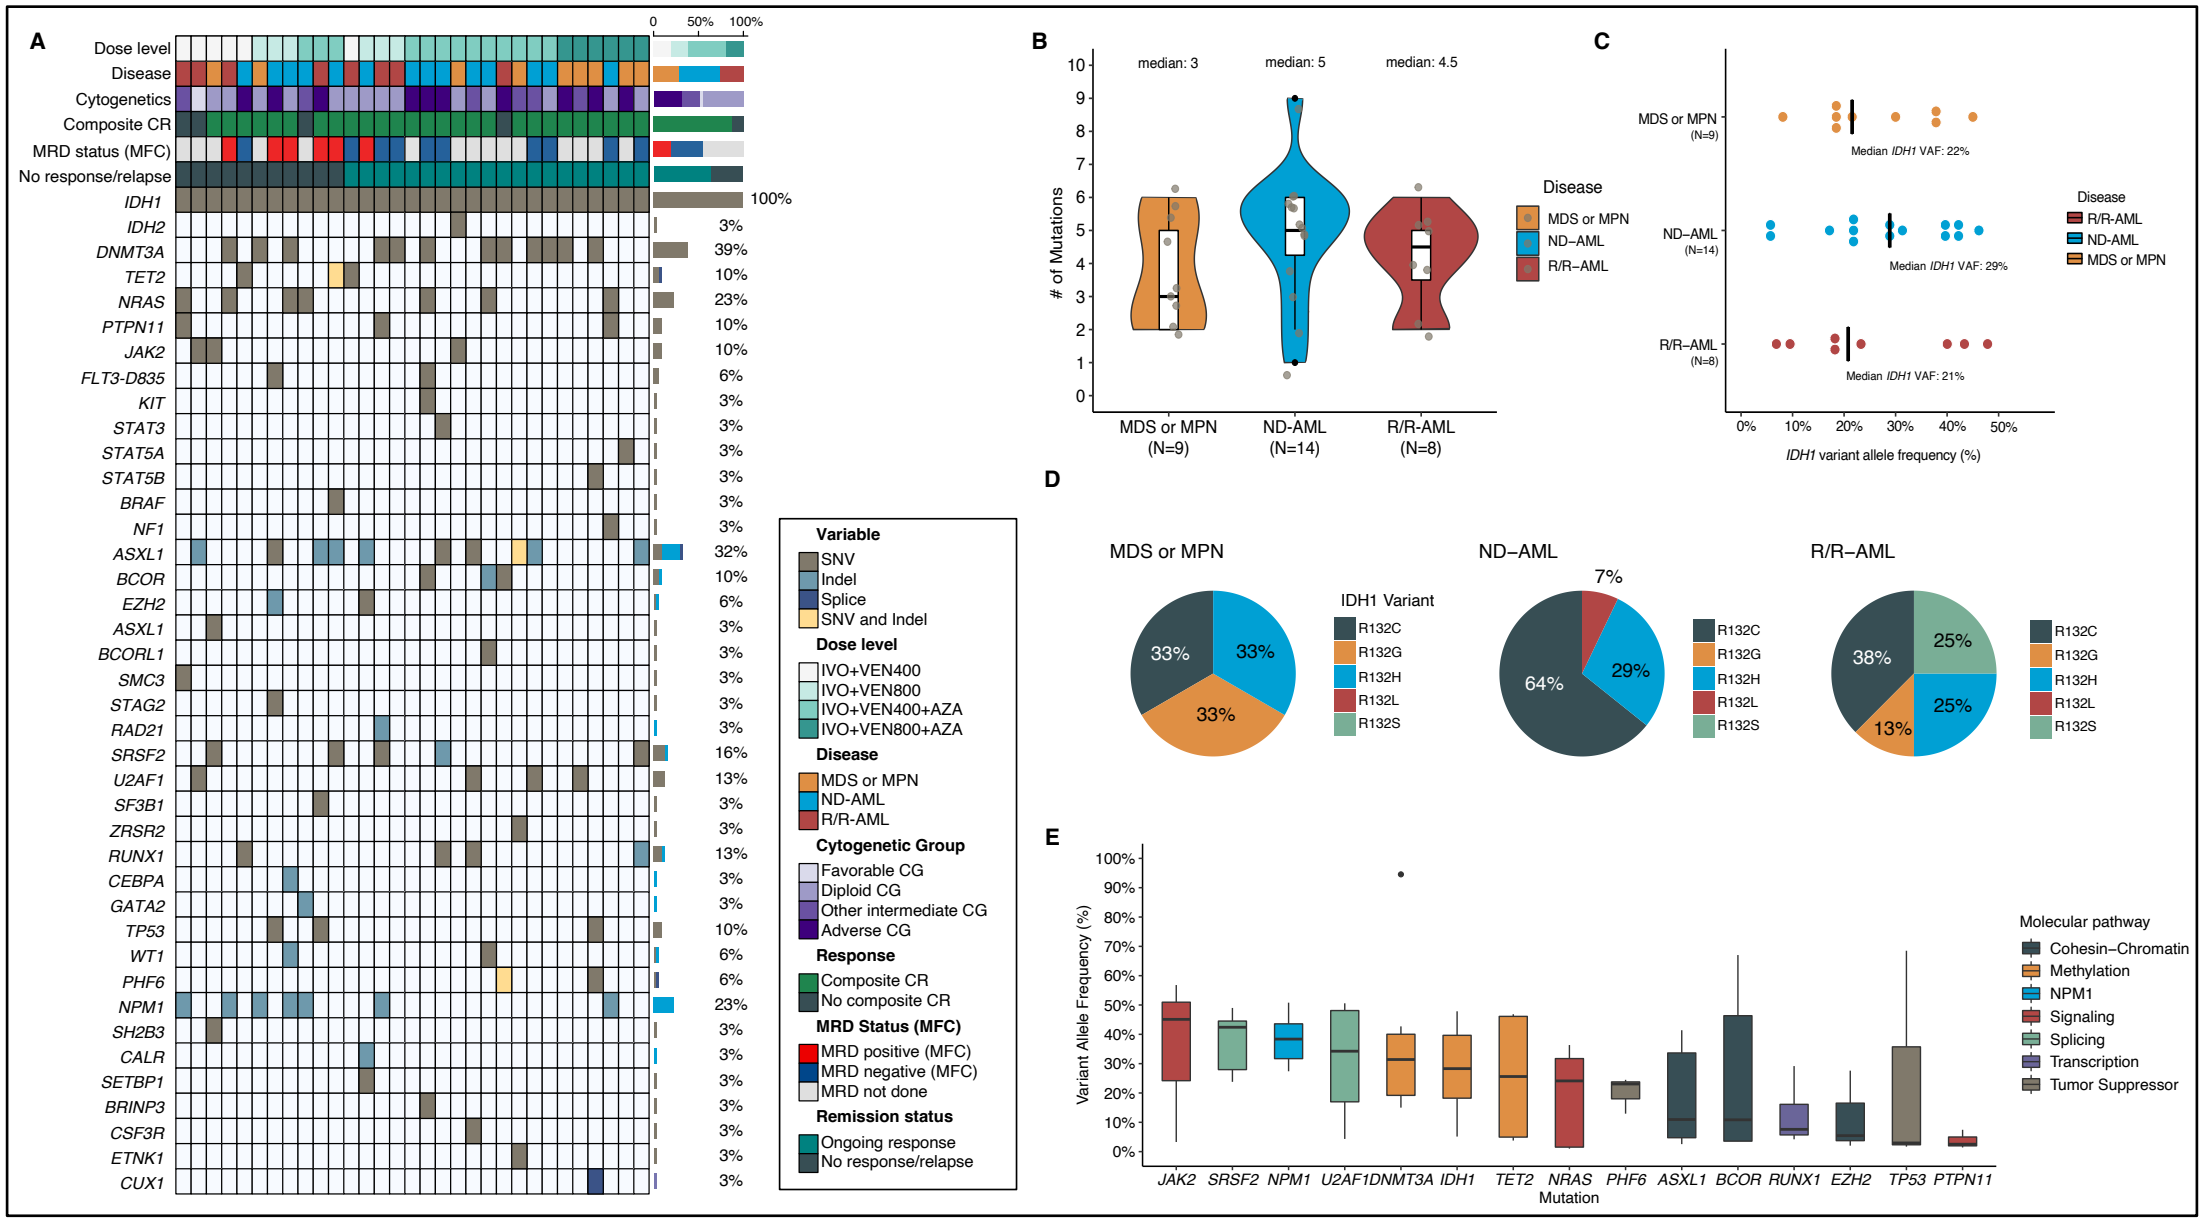

**Figure S2: Pharmacokinetics of IVO+VEN or IVO+VEN+AZA (continued).** (A), AUC 24 and (B), Cmax of IVO+VEN or IVO+VEN+AZA within each respective dose level demonstrated a decrease in the presence of IVO when assessed on C2D14 compared to sampling on C1D14 in the absence of co-occurring IVO administration.

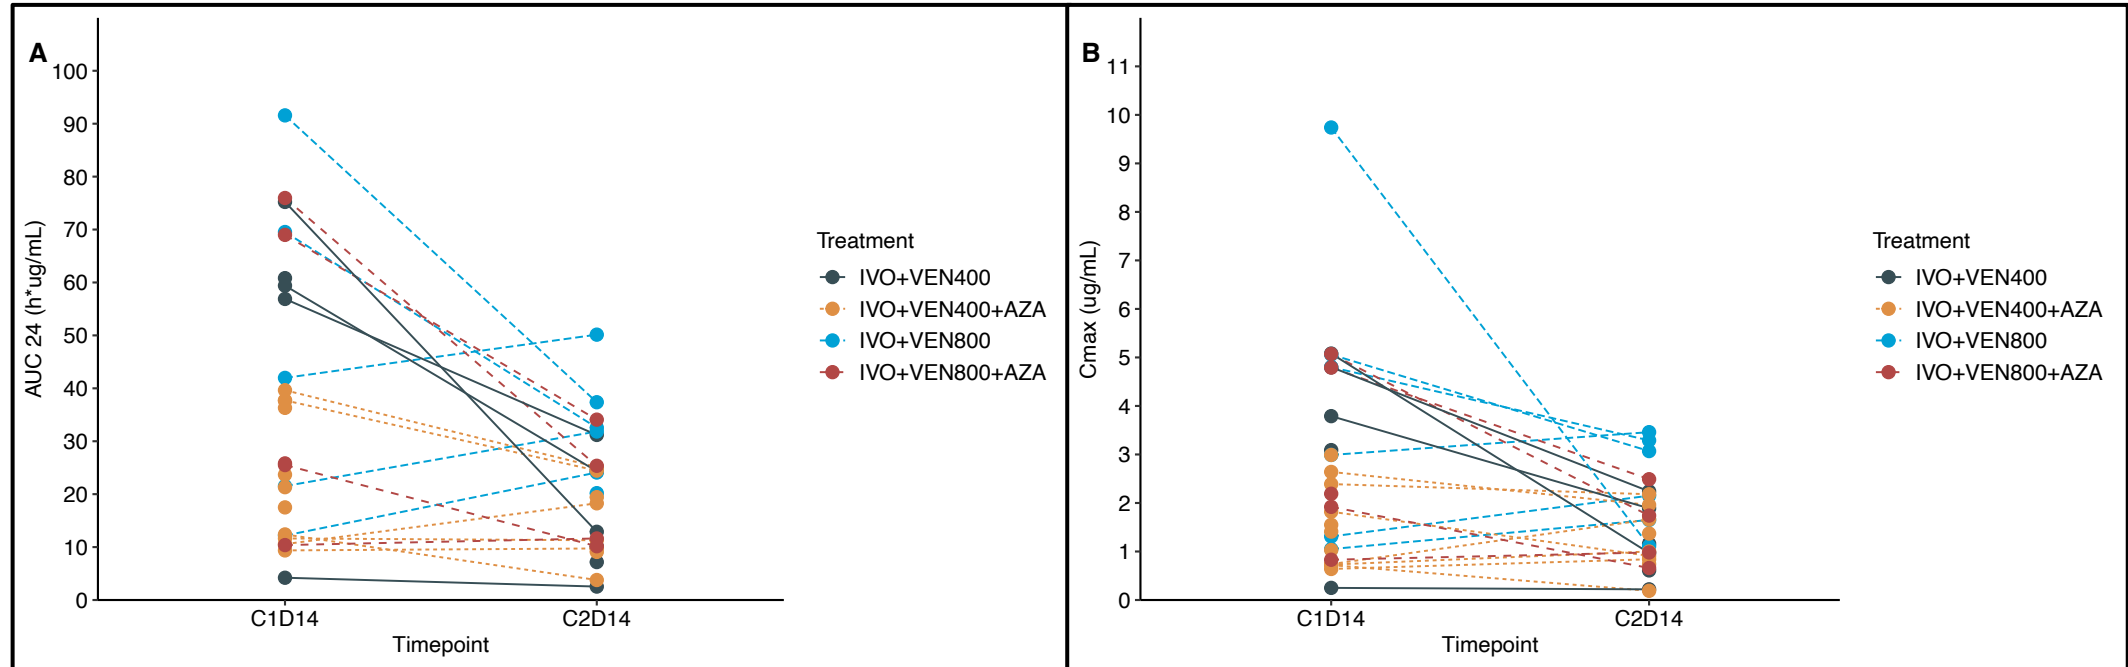



**Figure S3:** CONSORT diagram of study participants

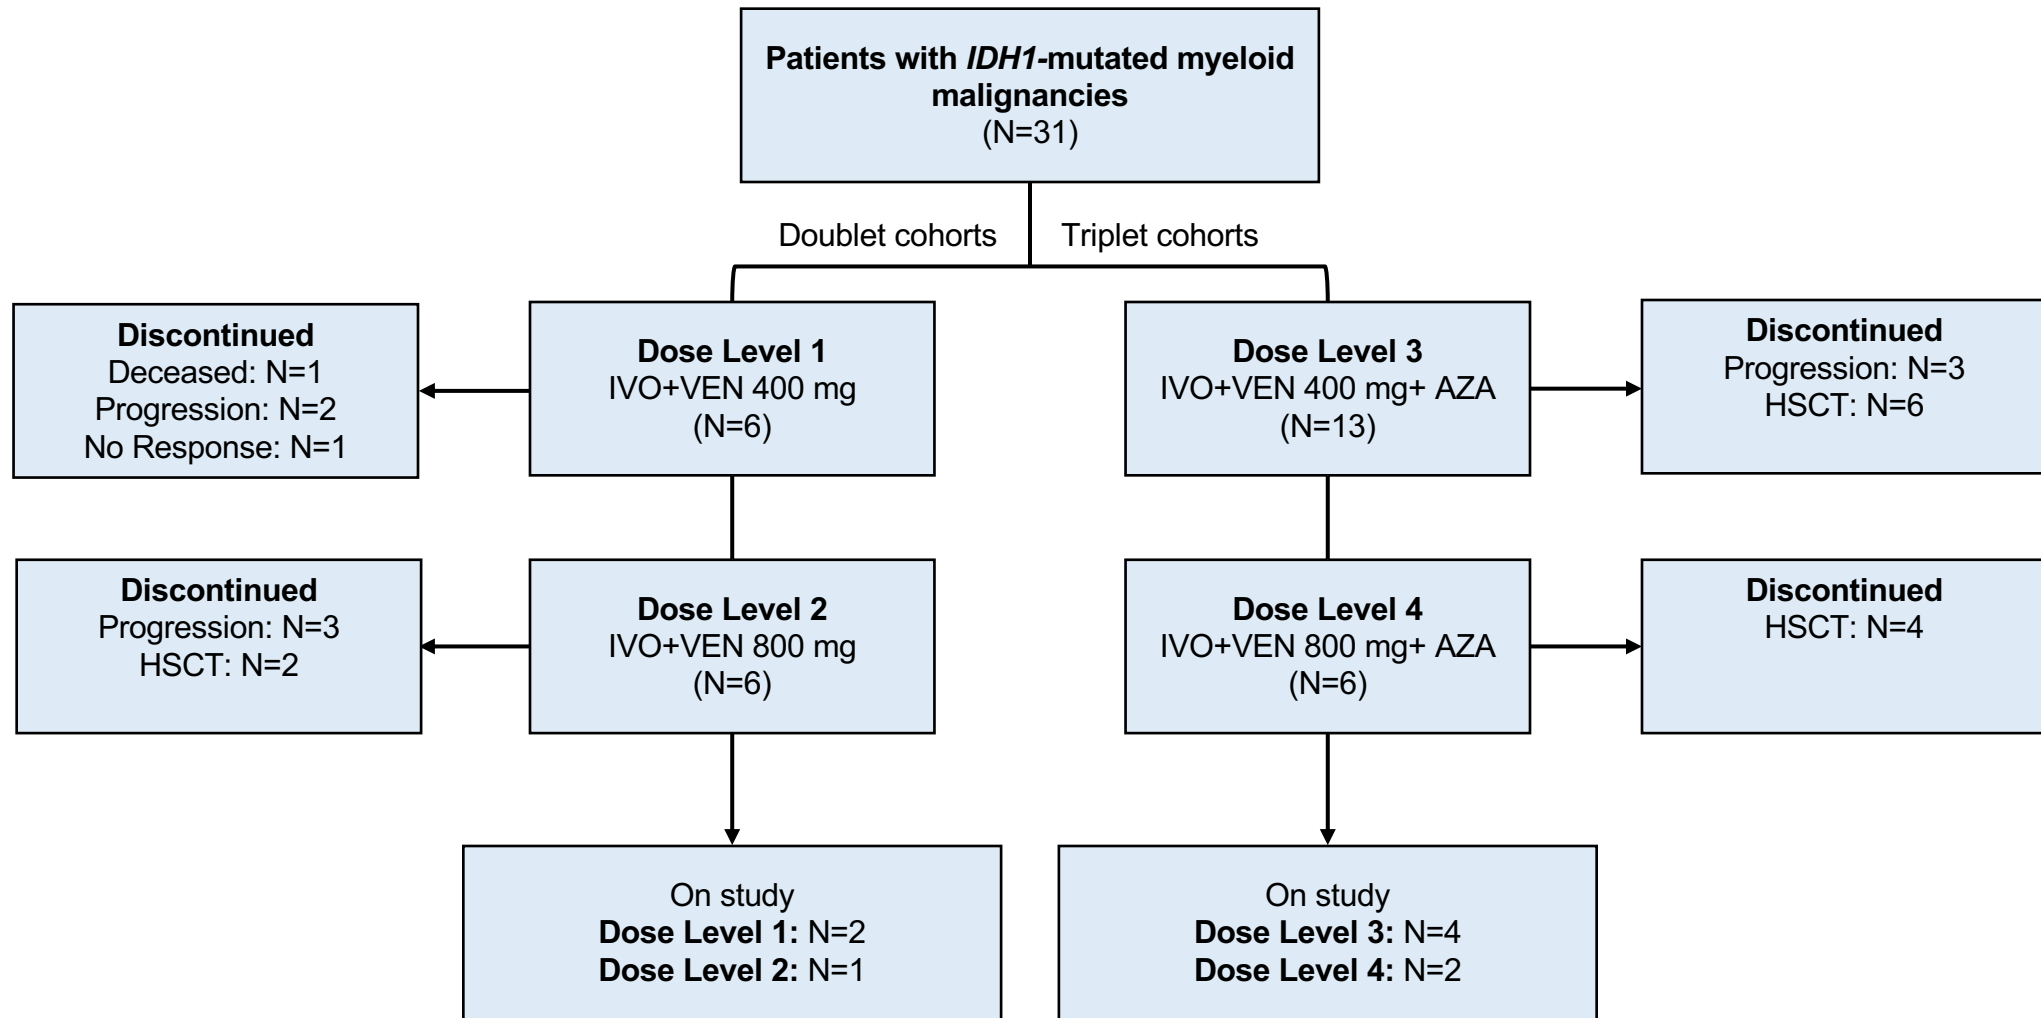

**Figure S4: Bone marrow response and recovery following IVO+VEN or IVO+VEN+AZA.** (A), Bone marrow blast reduction following one cycle of therapy with IVO+AZA, or IVO+VEN+AZA among all patients with an adequate bone marrow samples (N=28). Three patients had inadequate/hypocellular EOC1 bone marrow aspirations and were excluded. One patient enrolled with MRD+ AML only. (B) Cycle lengths during the first four cycles of treatment. Patients treated with IVO+VEN had significantly shorter cycle lengths for cycle 1 compared to patients treated with IVO+VEN+AZA.

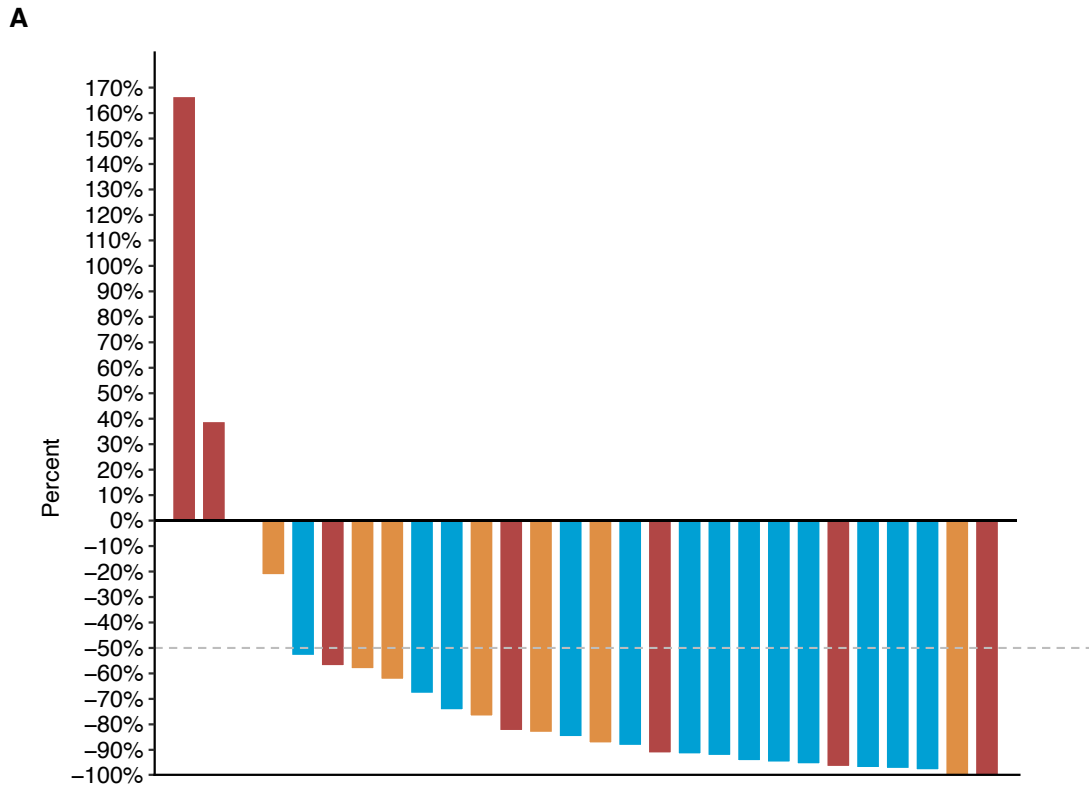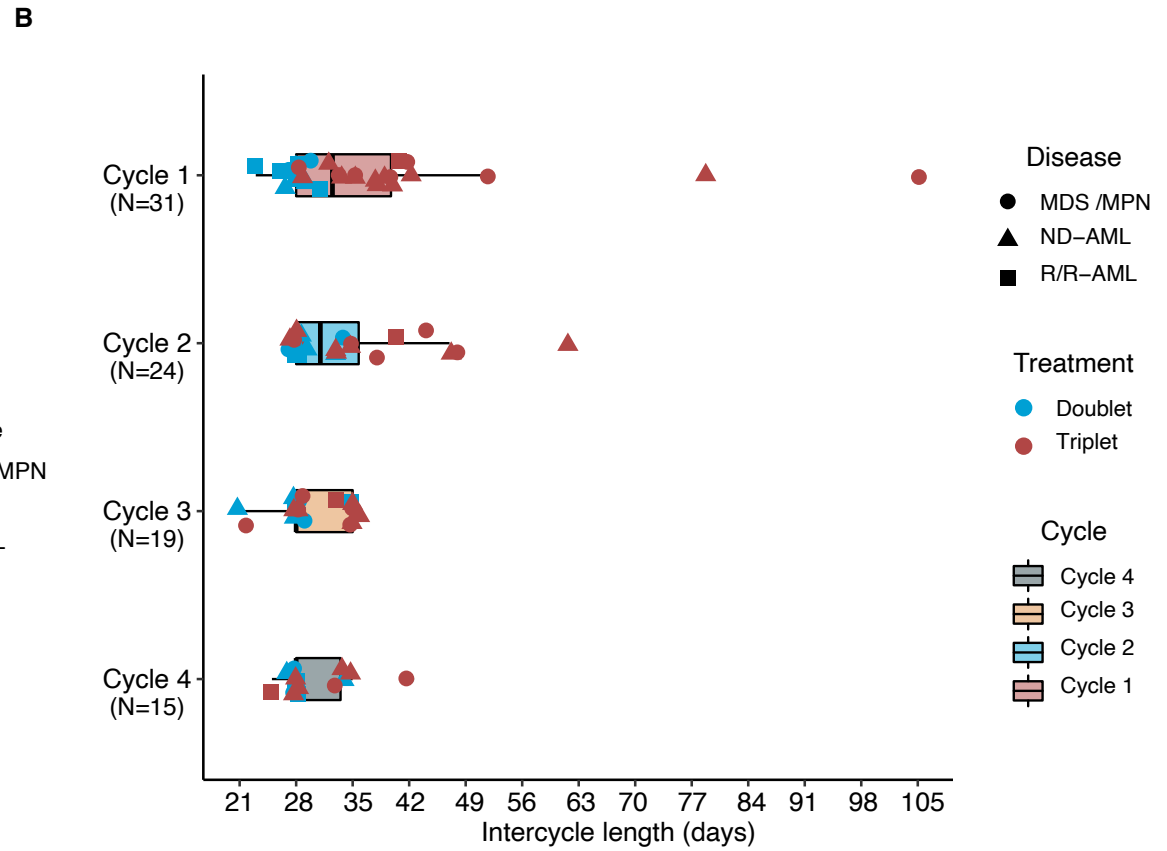

**Figure S5: Adverse events in patients treated with IVO+VEN or IVO+VEN+AZA.** (A), Common adverse events occurring in four or more patients on study during the entire phase 1b study period demonstrated by grade, (B), by receipt of IVO+VEN vs. IVO+VEN+AZA, (C), and by dose level.

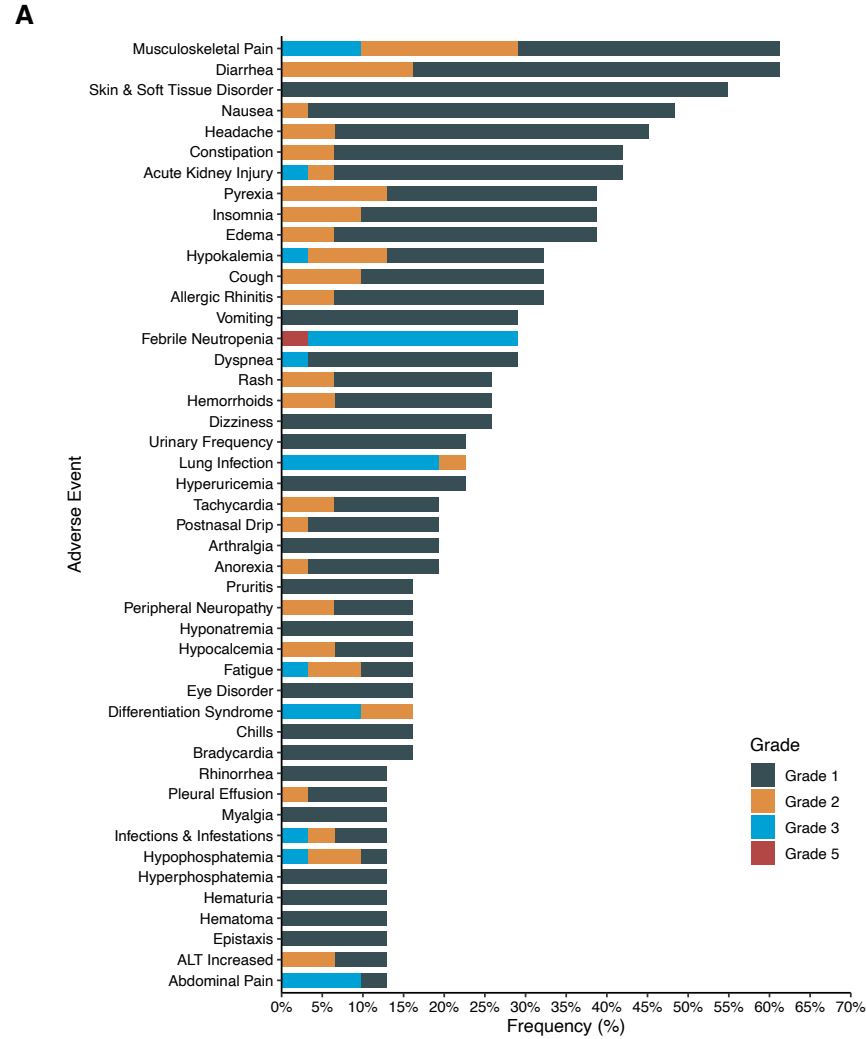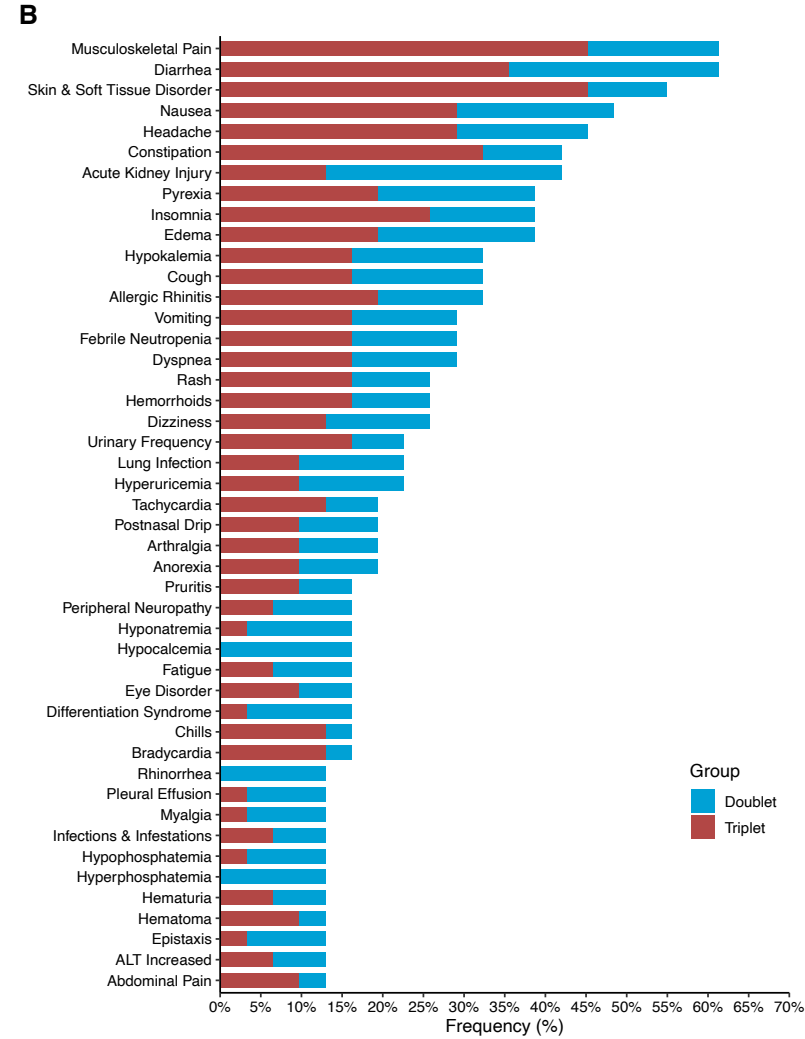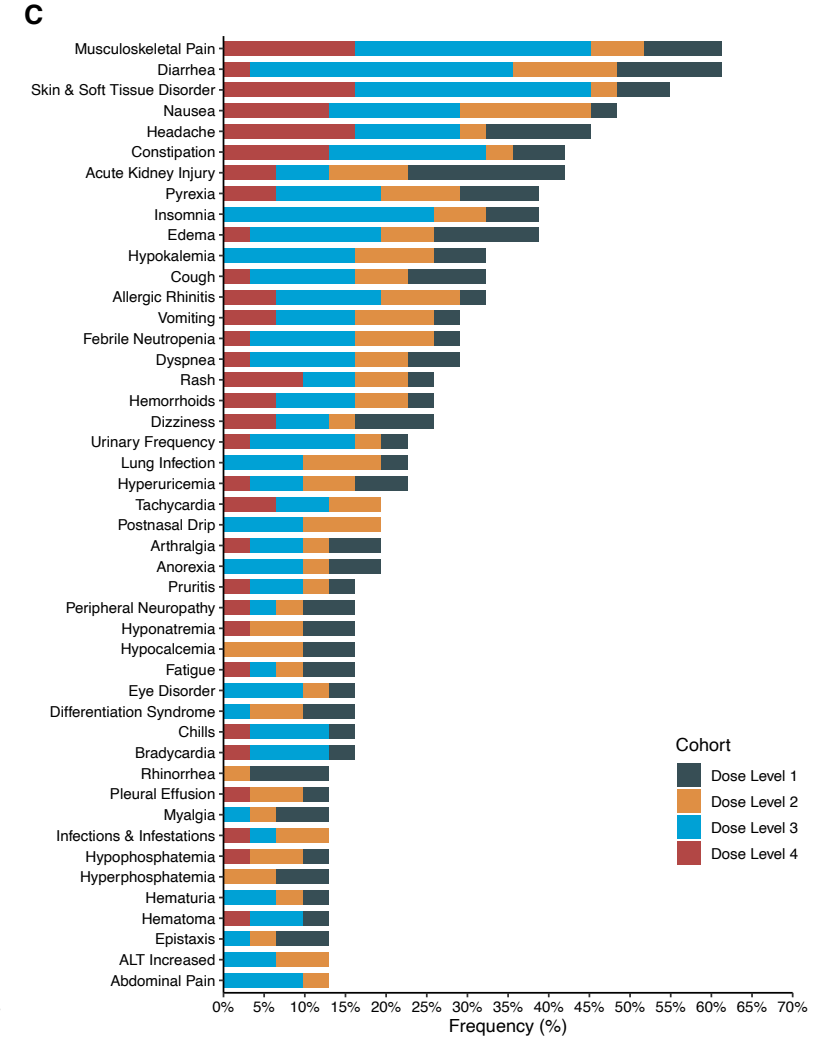

**Figure S6: Morphologic and MRD response to IVO+VEN in ND-AML.** Morphologic response, MRD-MFC, and *IDH1* ddPCR status by treatment cycle in patients with ND-AML treated with the doublet combination of IVO+VEN 400 or VEN 800

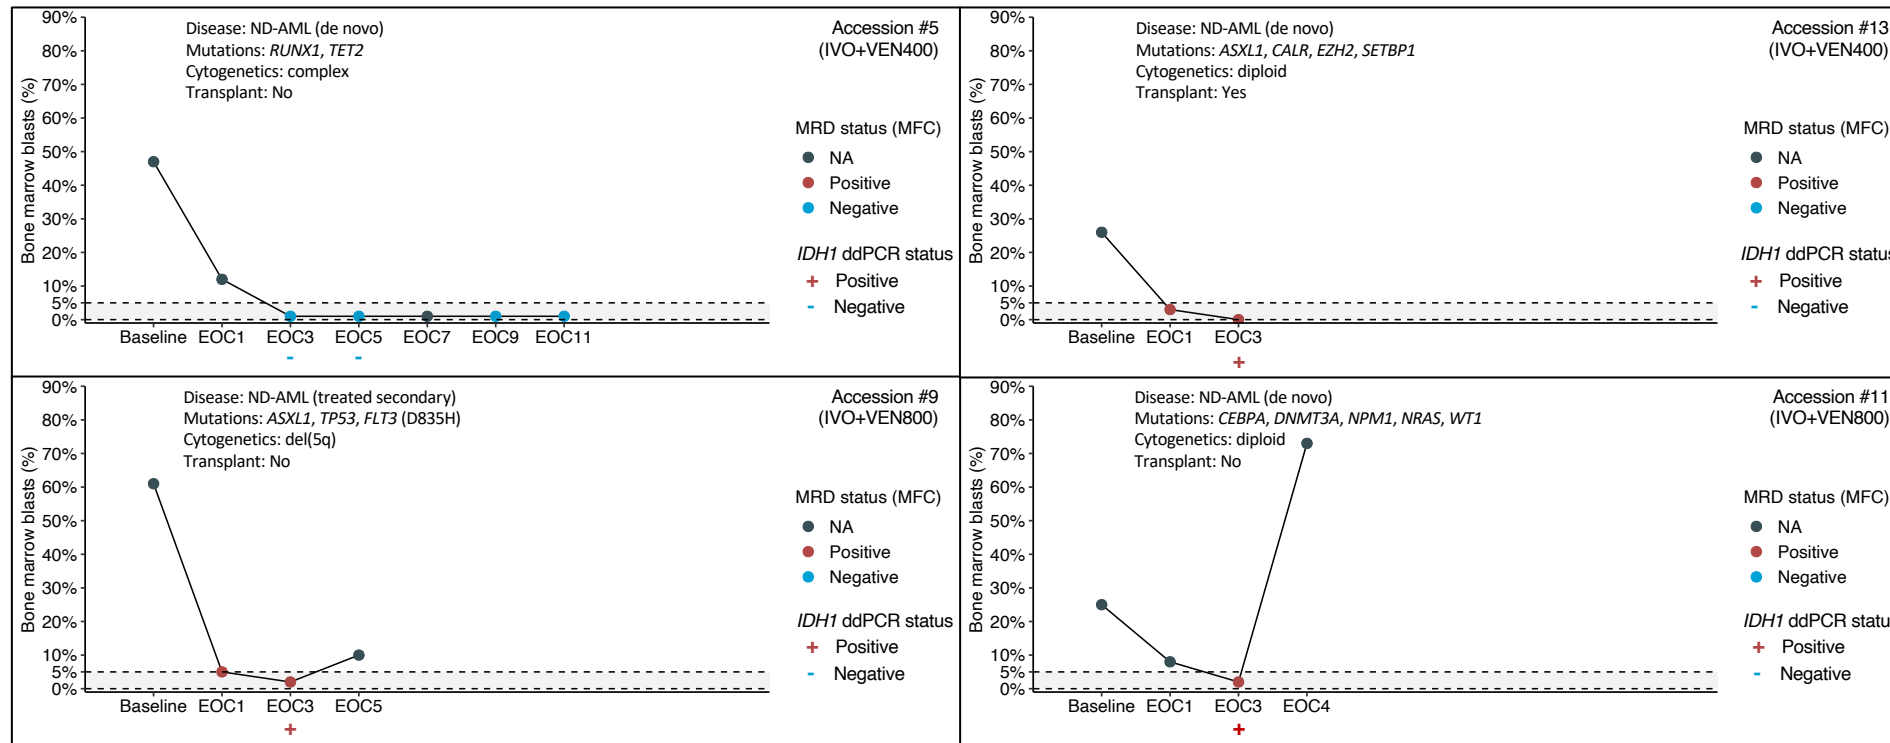

**Figure S7: Morphologic and MRD response to IVO+VEN+AZA in ND-AML.** Morphologic response, MRD-MFC, and *IDH1* ddPCR status by treatment cycle in patients with ND-AML treated with the triplet combination of IVO+VEN 400 or VEN 800 +AZA

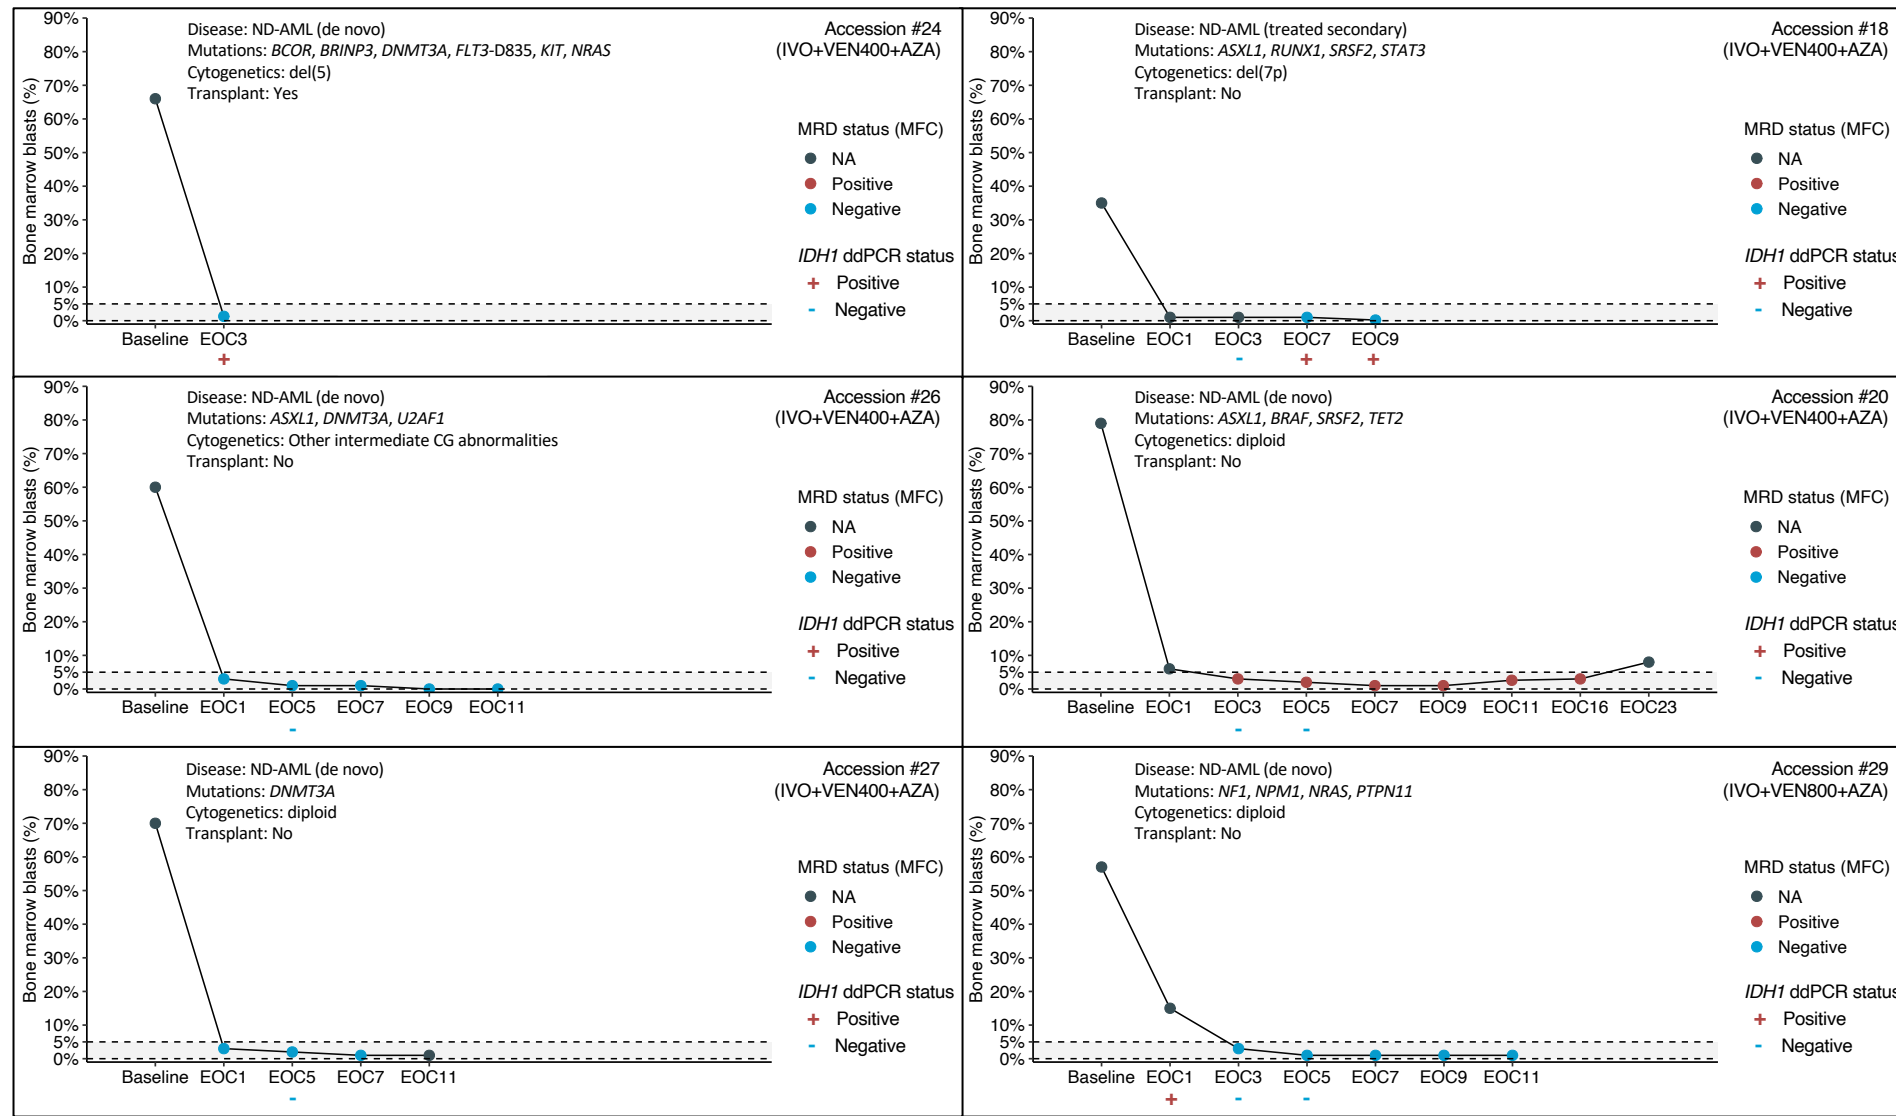

**Figure S8: Morphologic and MRD response to IVO+VEN or IVO+VEN+AZA in R/R-AML.** Morphologic response, MRD-MFC, and *IDH1* ddPCR status by treatment cycle in patients with R/R-AML treated with IVO+VEN with or without AZA

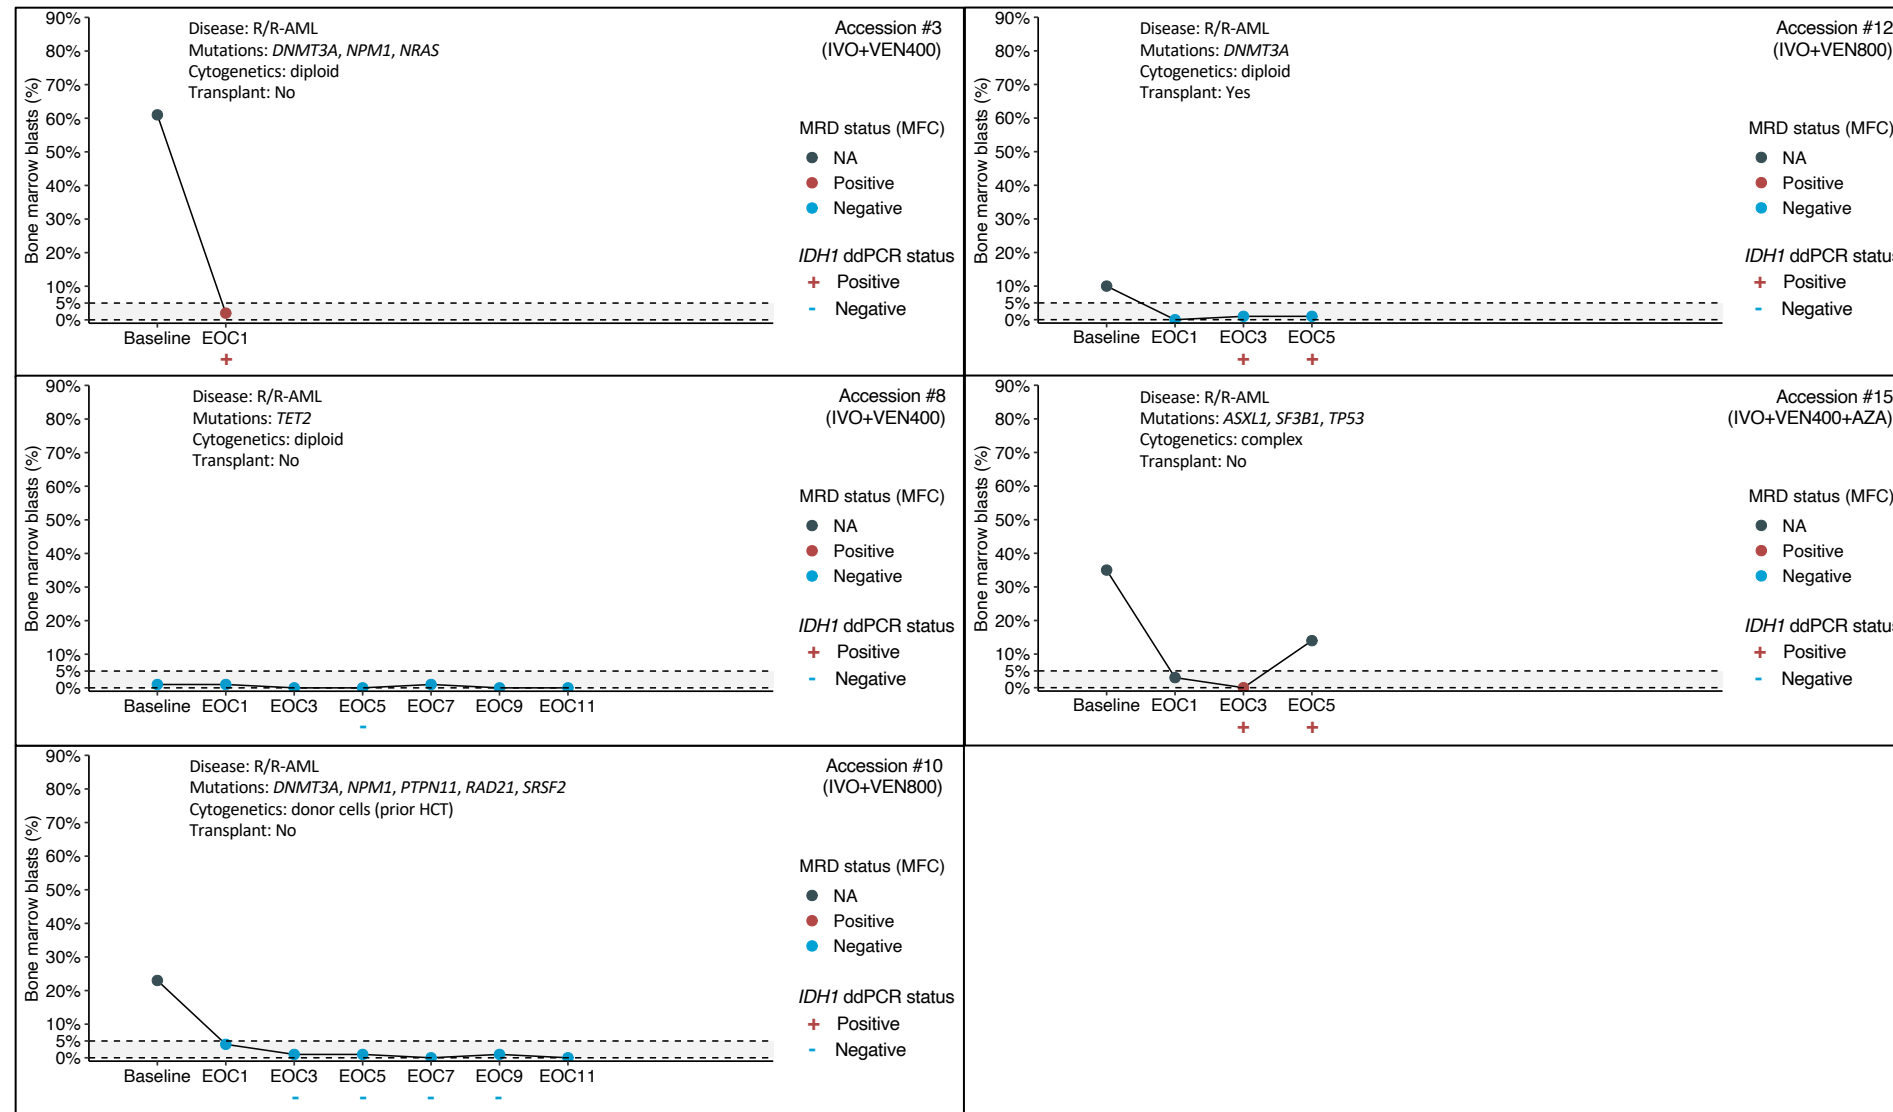

Figure S9: Response and outcome of patients treated with IVO+VEN or IVO+VEN+AZA. (A), Swimmer's plot of patients on study with IVO+VEN +/- AZA by dose level.

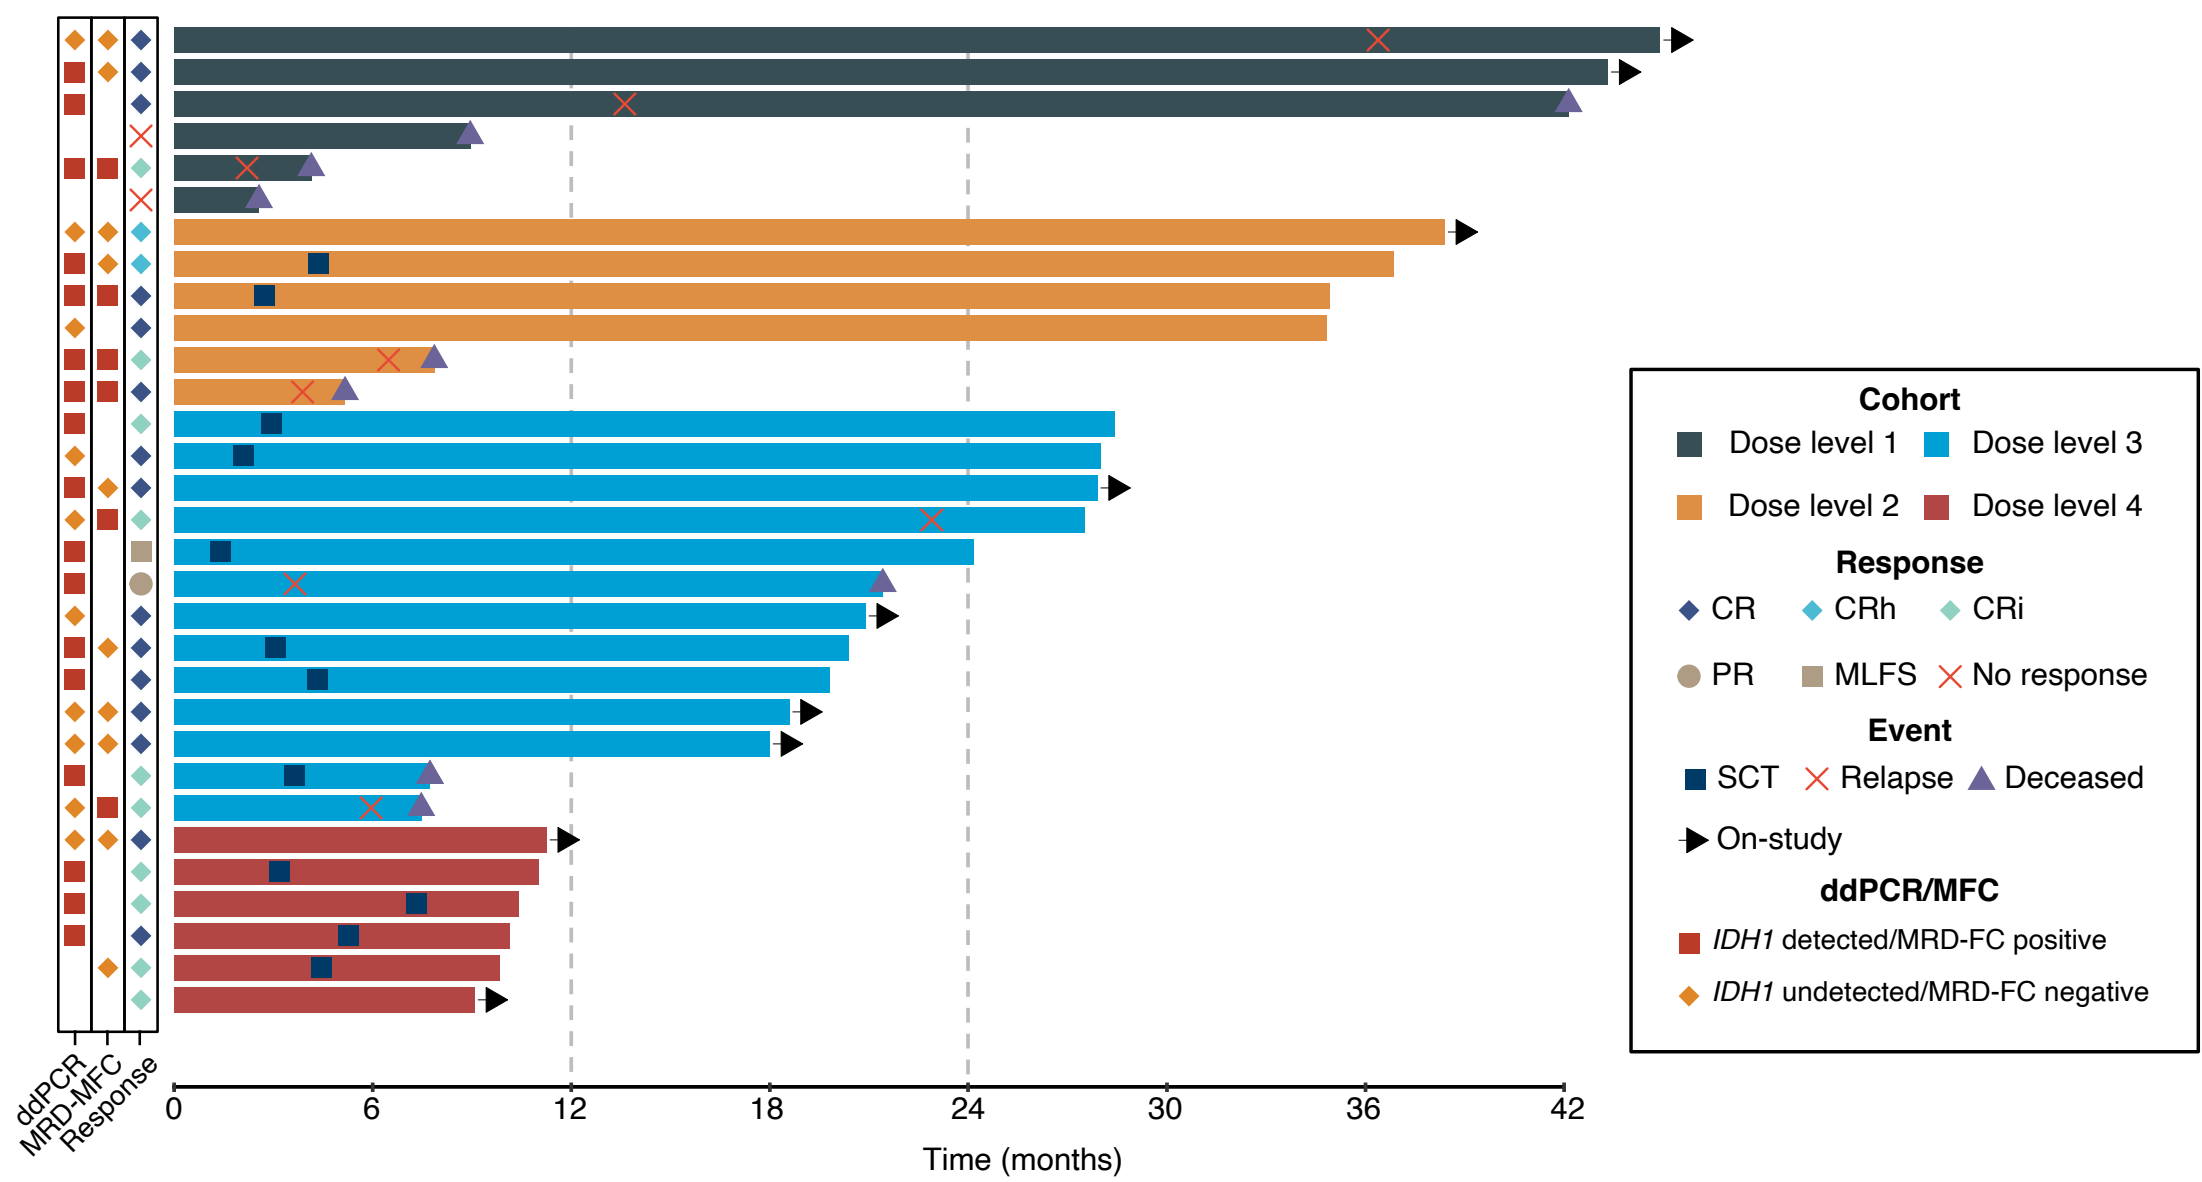

**Figure S10: Landmark overall survival analyses based on *IDH1* mutation detection in CRC using ddPCR as though performed on patients at baseline. (A), Overall survival from treatment start. (B), Including patients surviving at least 3-months (correlating with end of cycle 3). (C), Including patients surviving at least 5-months (correlating with end of cycle 5). (D), Including patients surviving at least 7-months (correlating with end of cycle 7).**

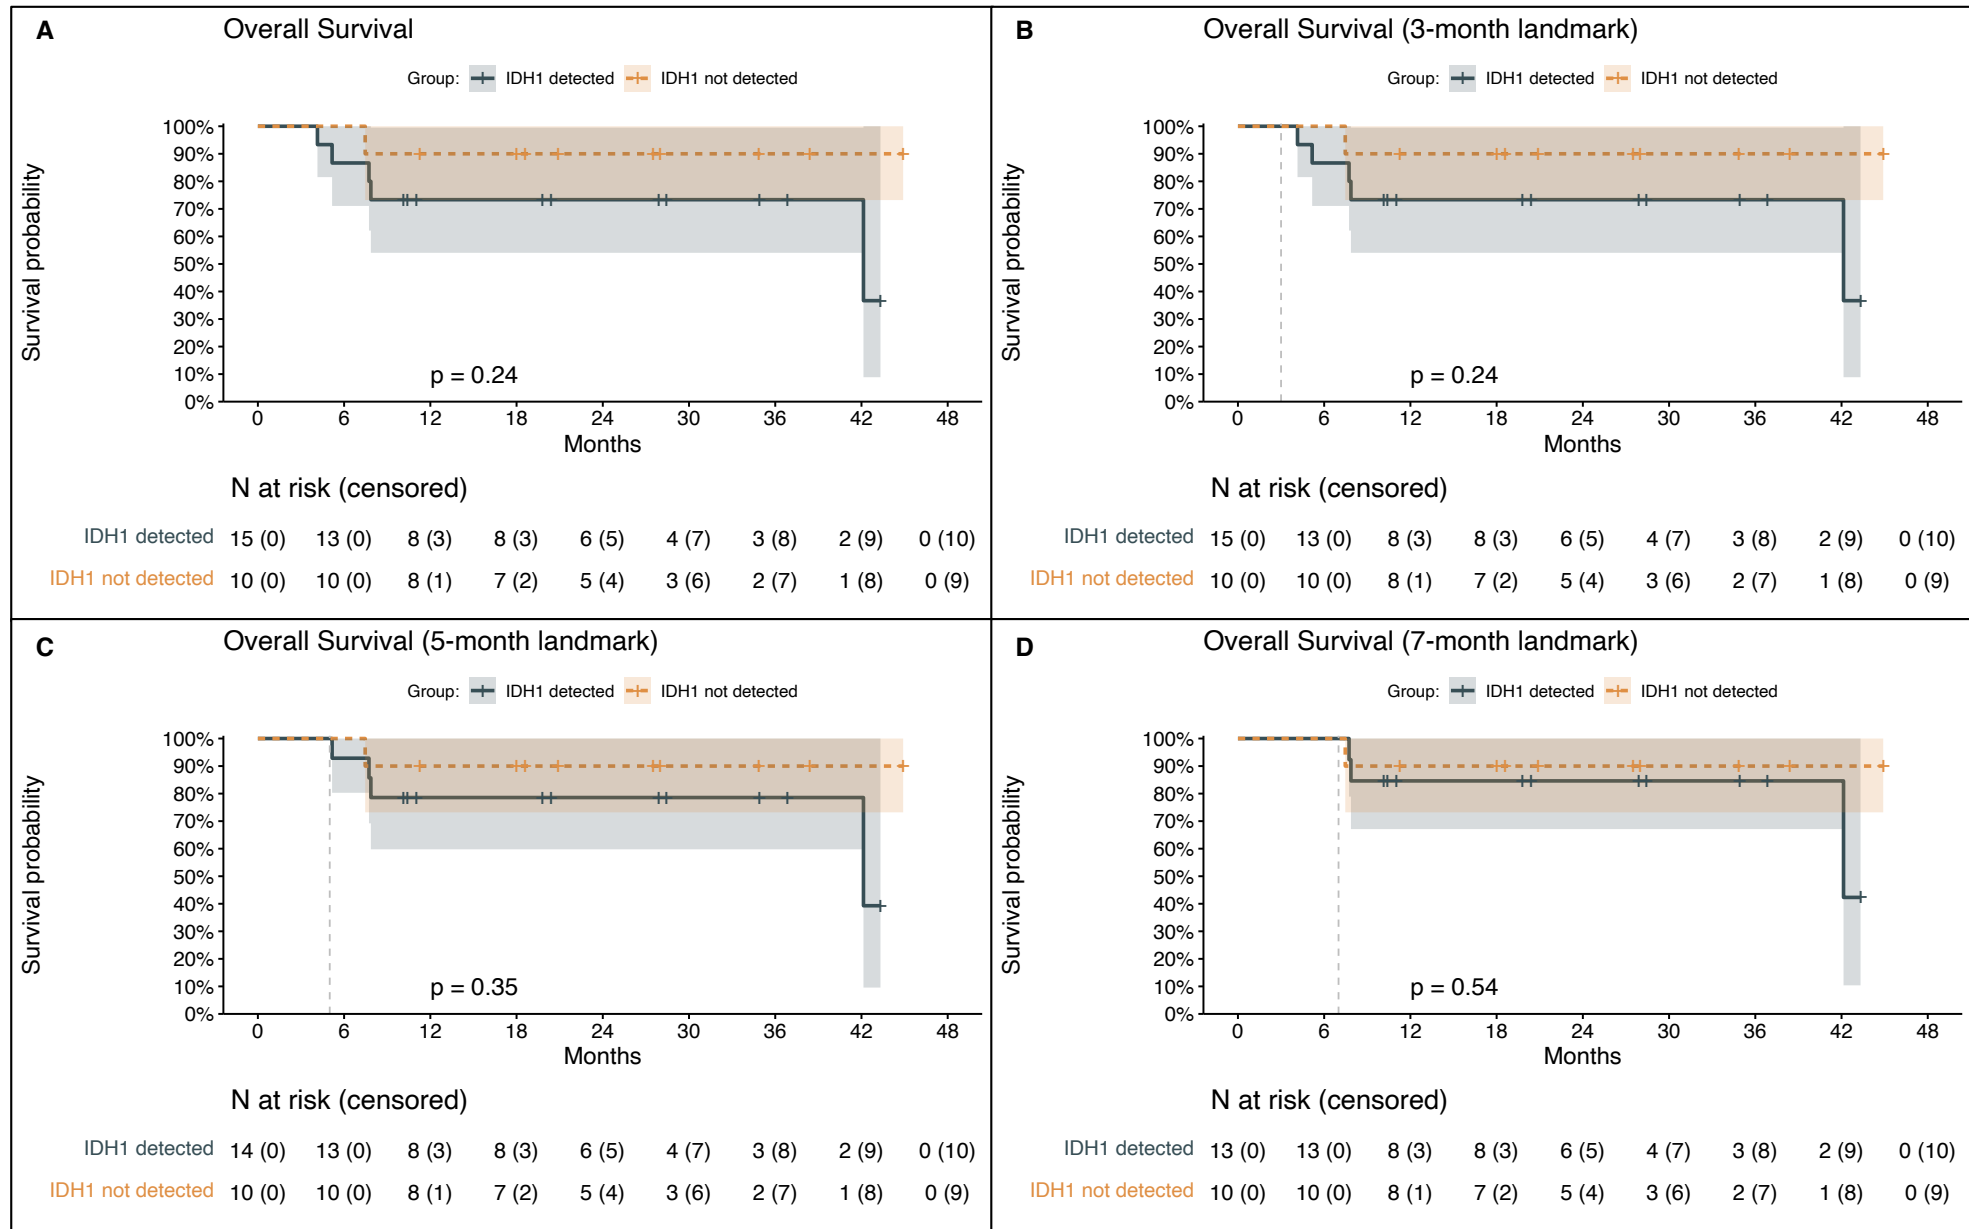



**Figure S11: Influence of biological pathways on survival following IVO+VEN or IVO+VEN+AZA treatment.** (A), Overall survival by methylation mutations. (B), Overall survival by signaling mutations. (C), Overall survival in all patients with signaling mutations based upon receipt of IVO+VEN or IVO+VEN+AZA. (D), Overall survival in patients with AML and signaling mutations based upon receipt of IVO+VEN or IVO+VEN+AZA.

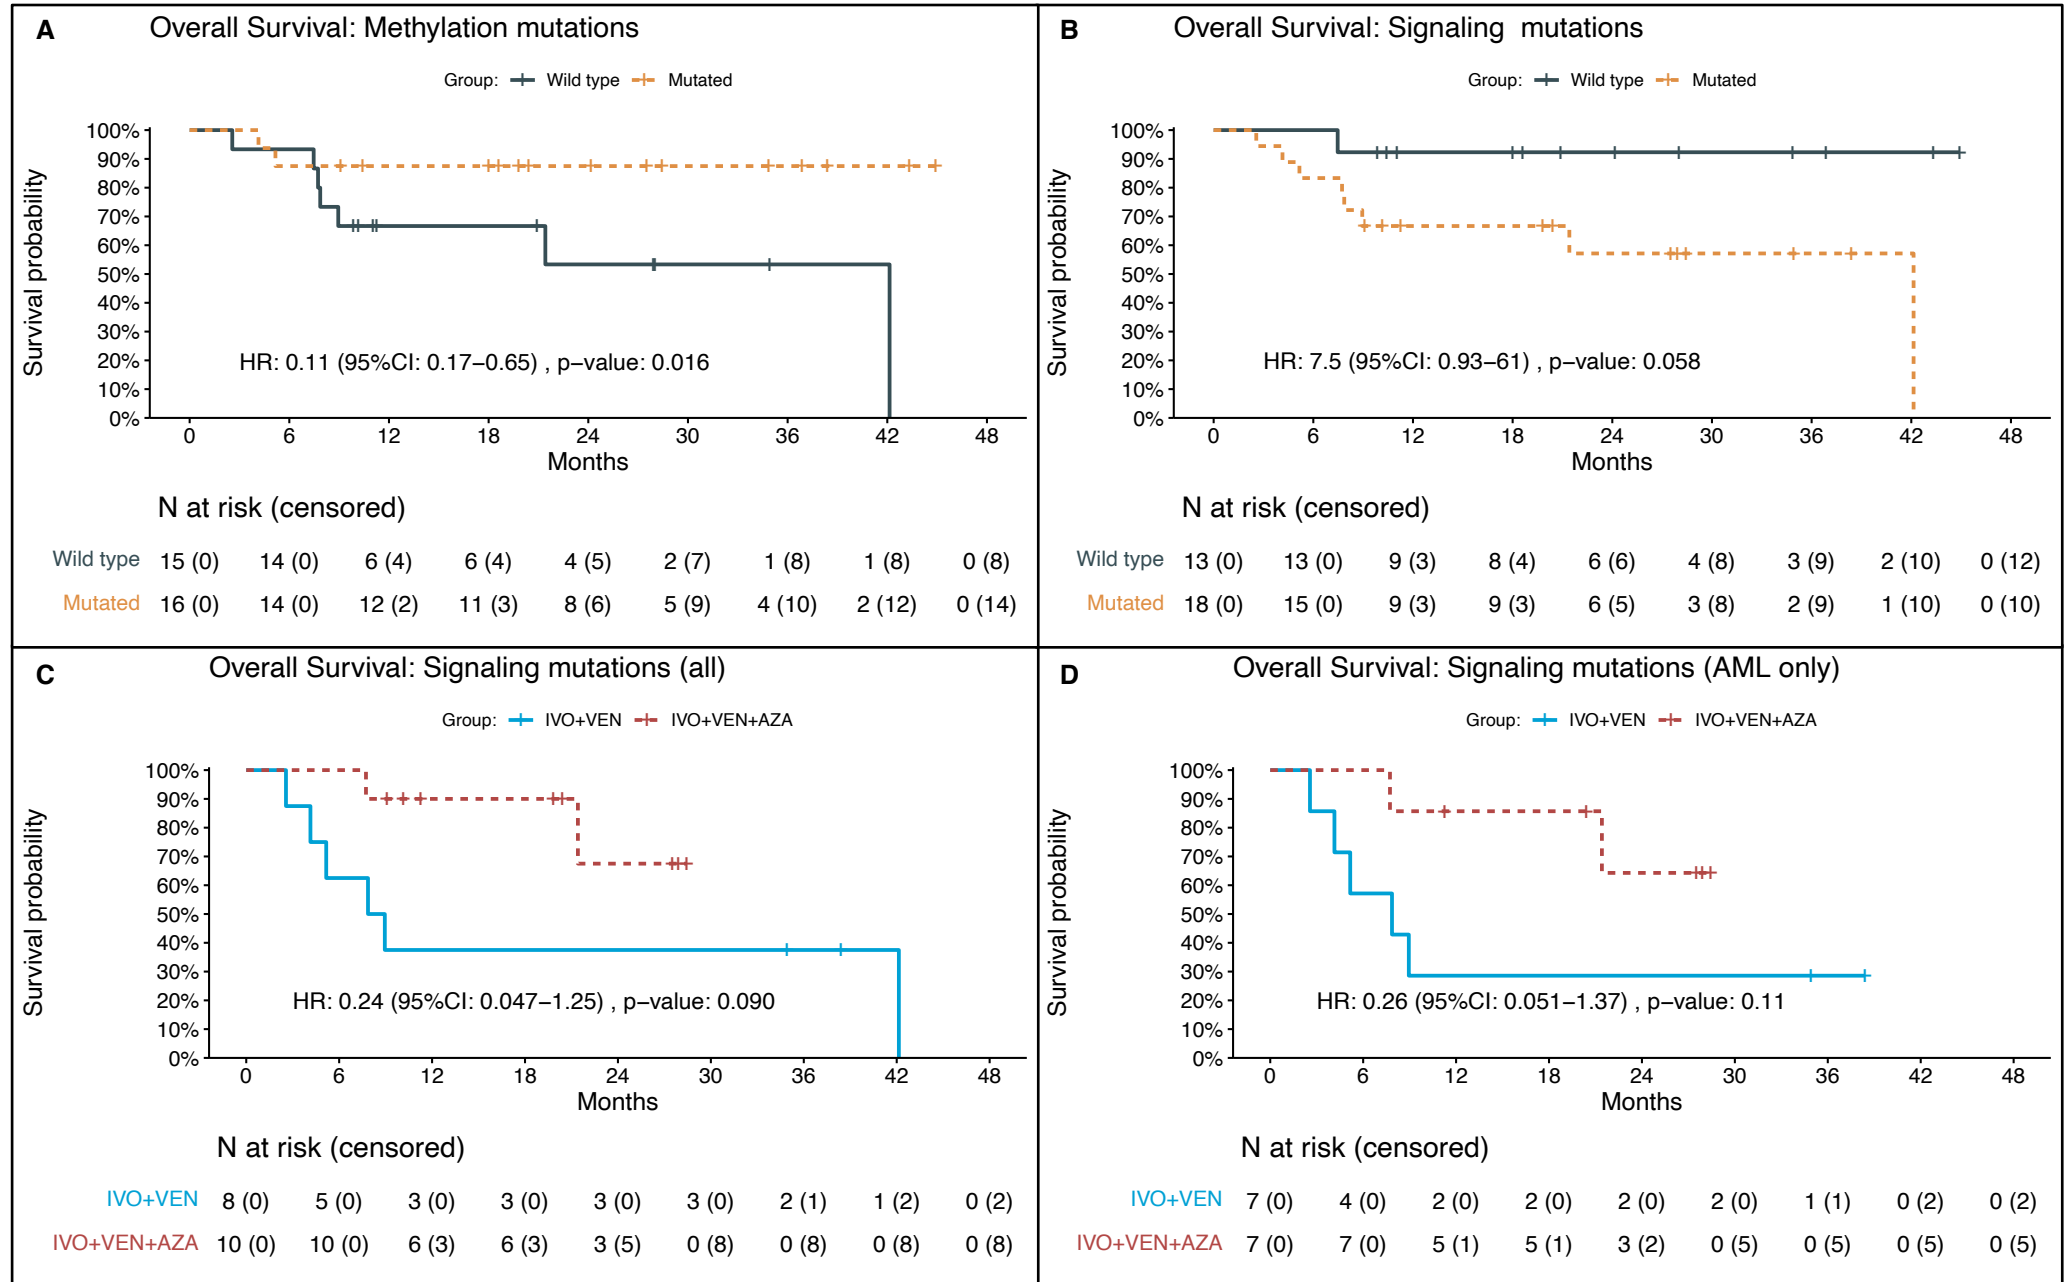

**Figure S12: Persistent mutations in a long-term responder with ND-AML identifies mutations within a CD16+ monocytic population.** (A and B), DAb-seq analysis at diagnosis and in remission in a patient with ND-AML (accession #18) and co-occurring *RUNX1* p. L204Q and *IDH1* p.R132H mutations treated with IVO+VEN+AZA demonstrated treatment eliminated the majority of *IDH1* and *RUNX1* co-mutated cells. (C and D), The predominant population of CD34+ myeloblasts was eliminated with therapy, however residual cells containing *IDH1* and *RUNX1* in remission were clustered with a monocytic cell population with increased CD16 expression.

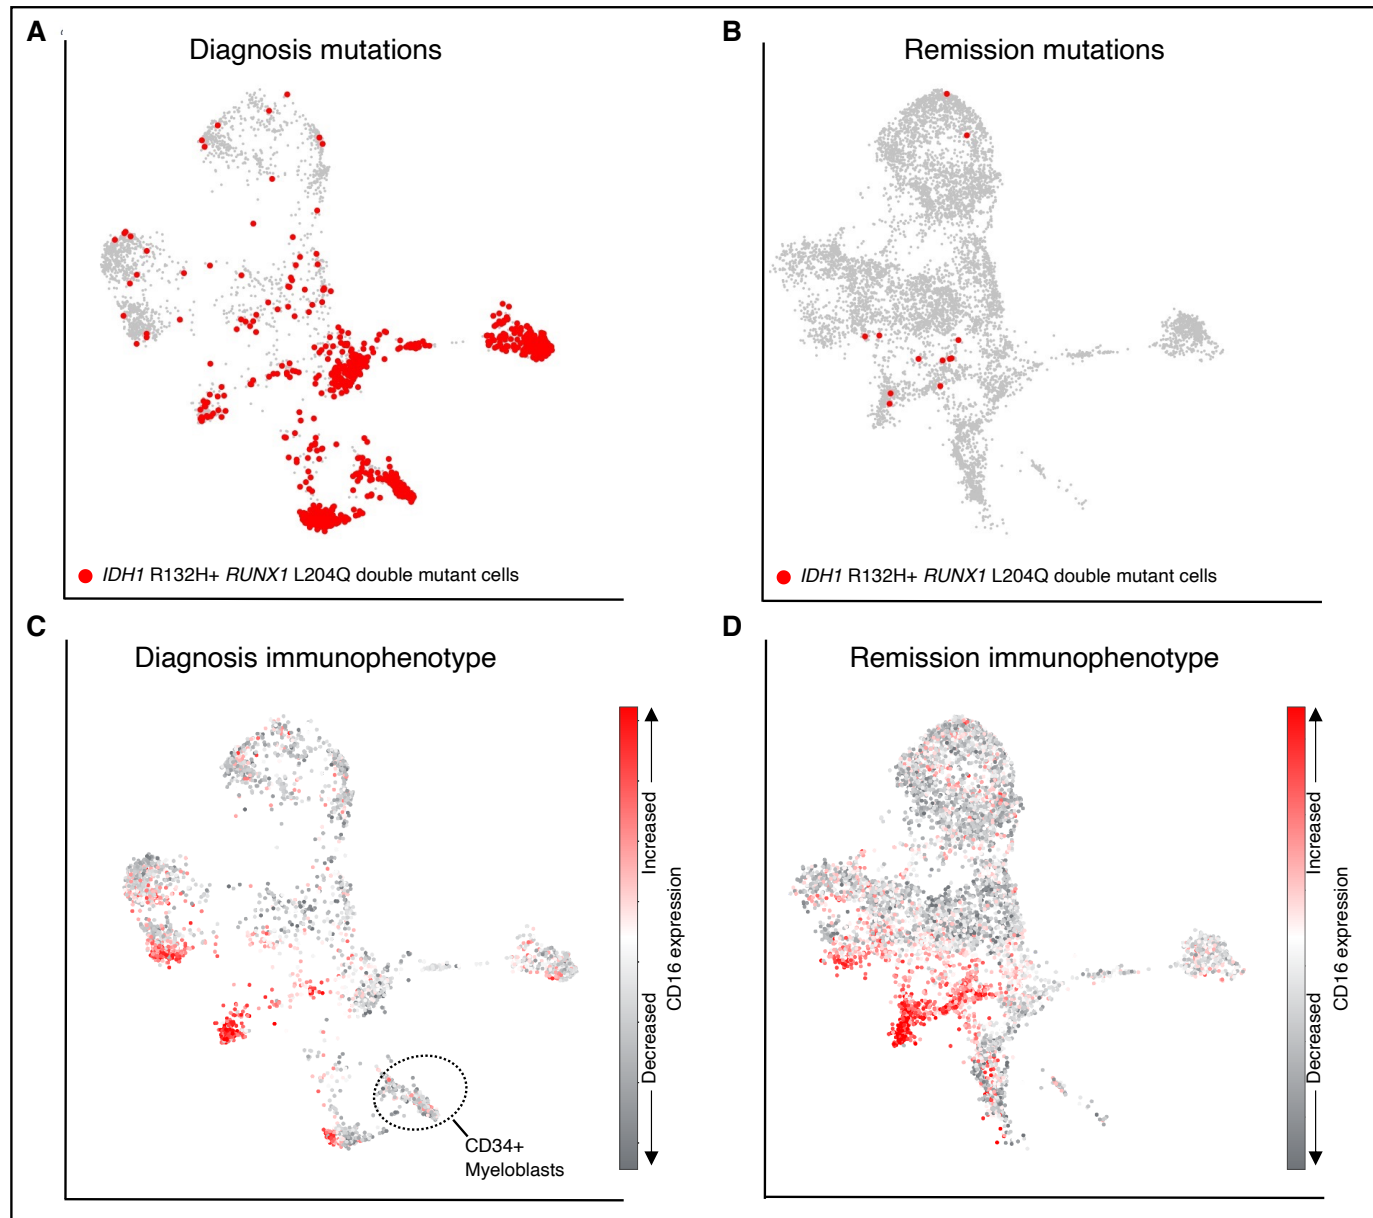

**Figure S13: Immunophenotypic shift occurring under treatment selection with targeted therapy.** Multiparameter flow cytometry in a patient with ND-AML (accession #20) demonstrating an alternative CD34+ population expanding at relapse compared to baseline, consistent with a phenotypic shift at disease.

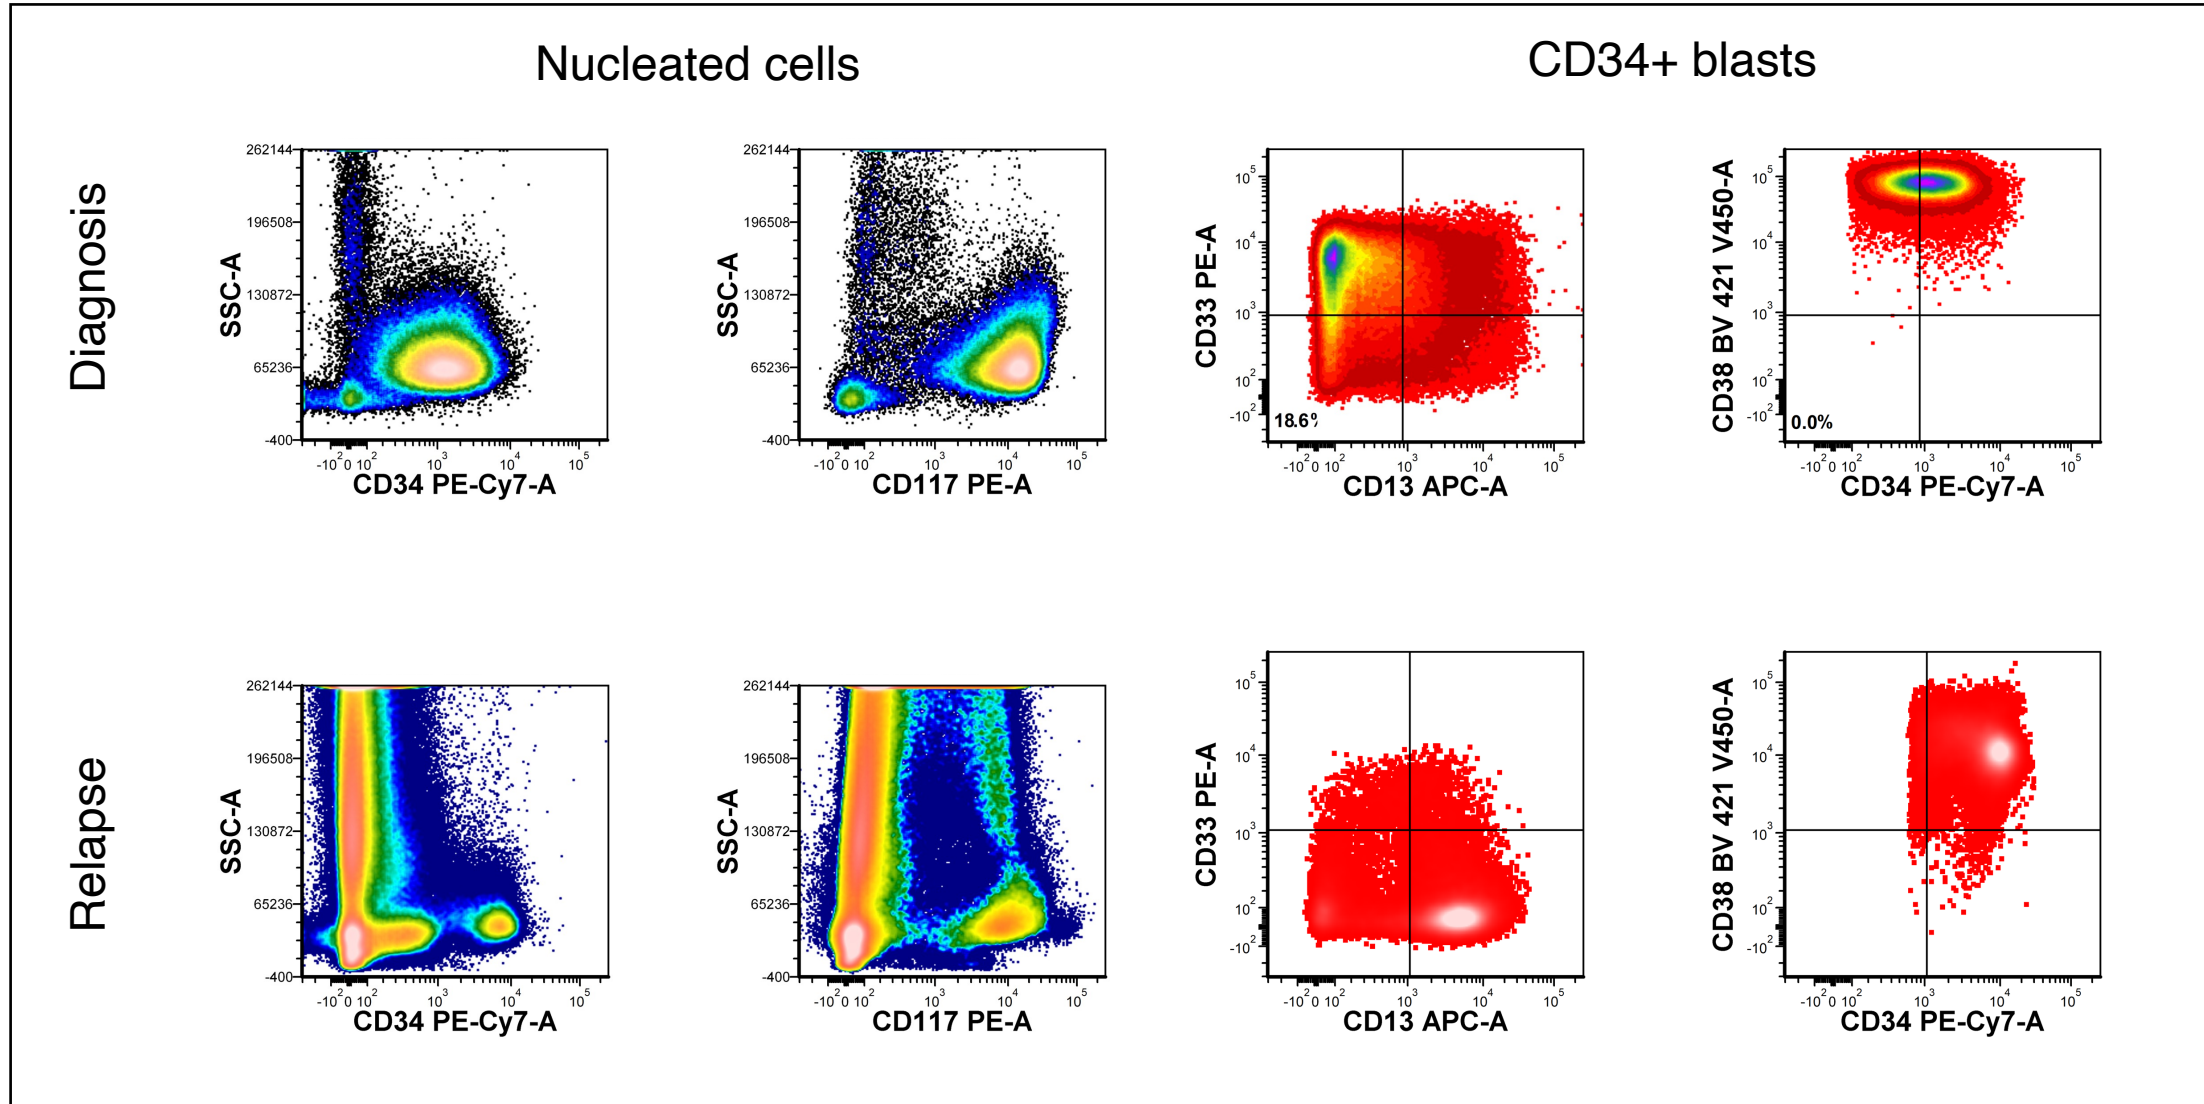

**Figure S14: Increased antiapoptotic protein expression levels correlate with resistance to IVO+VEN+AZA.** CyTOF analysis in a patient with ND-AML (accession #11) treated with IVO+VEN+AZA who initially attained CRc followed by disease progression. Increased alternative anti-apoptotic protein levels (BCL-xL and MCL1) were observed, in addition to increased CD44 levels.

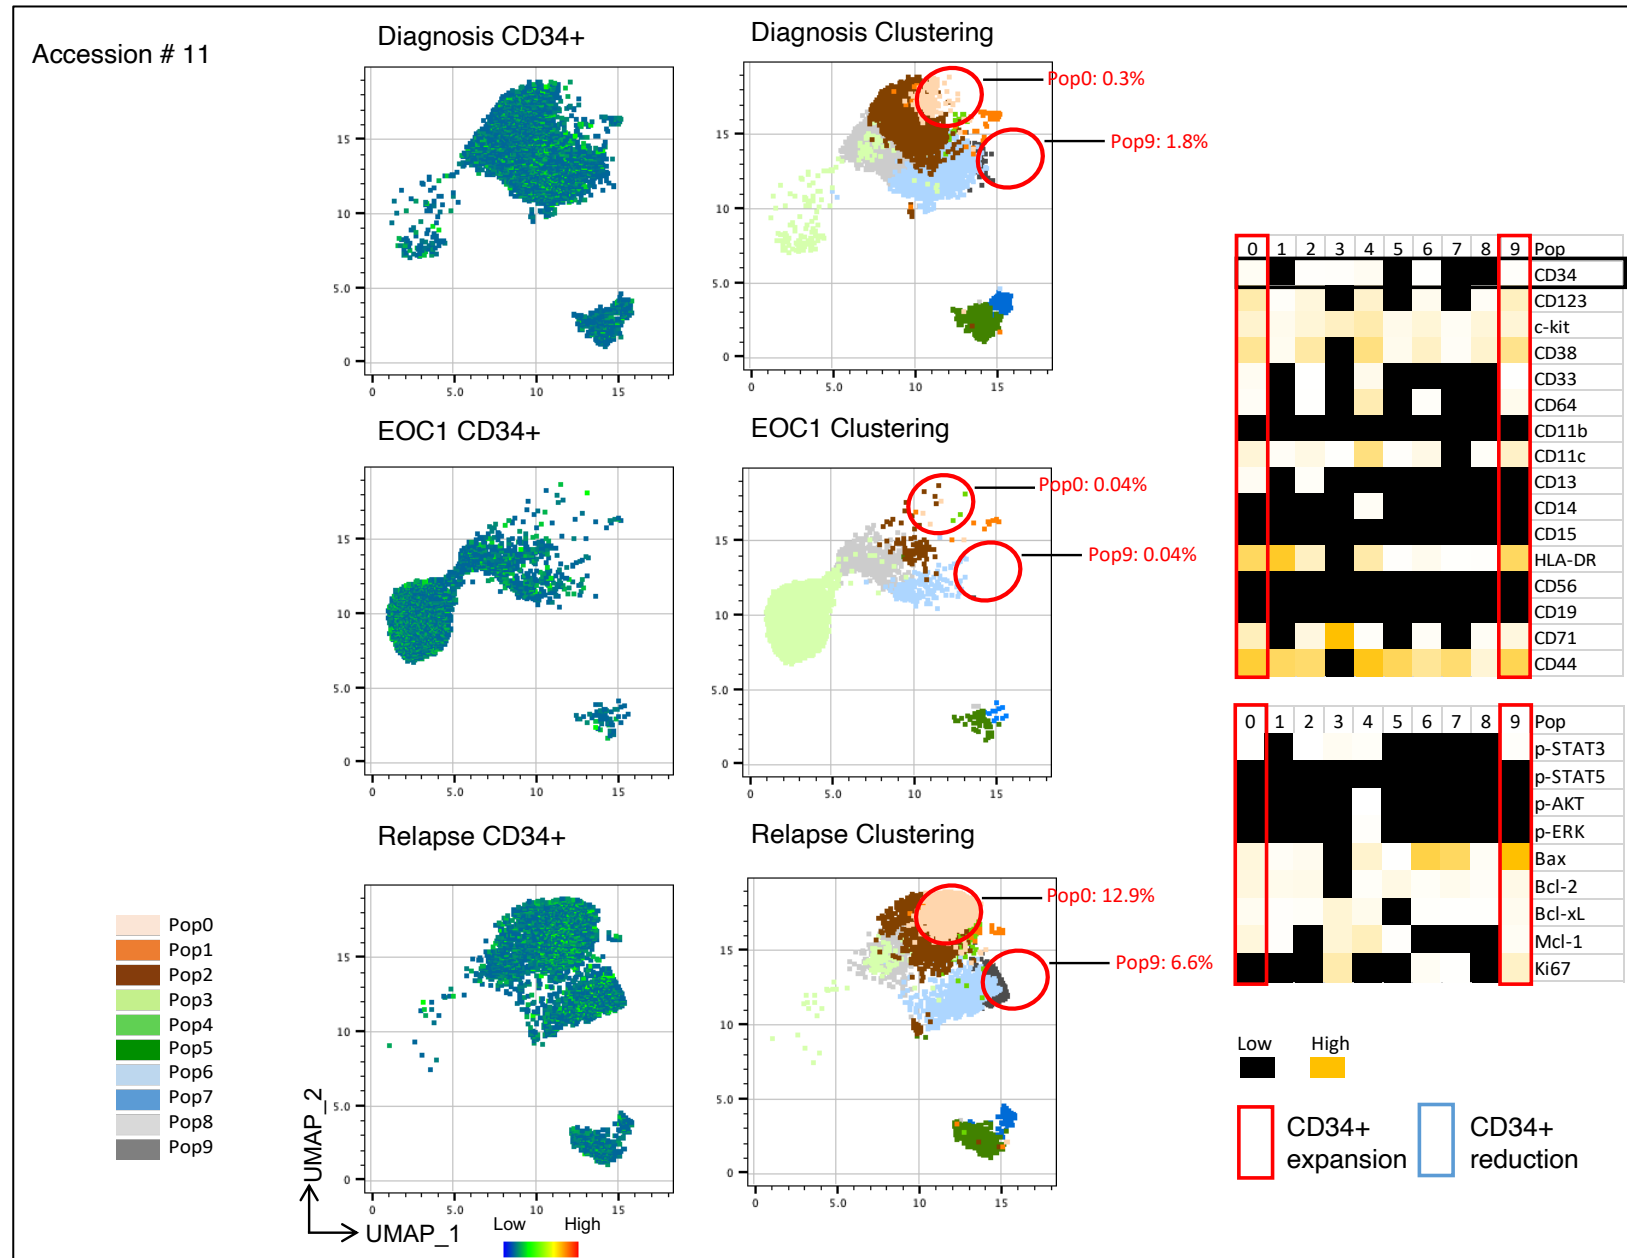

**Figure S15: Increased BCL2 levels relative to alternative anti-apoptotic proteins is associated with ongoing response to IVO+VEN+AZA. CyTOF analysis in a patient with ND-AML (accession #26) treated with IVO+VEN+AZA with a durable response to treatment following 18 cycles of therapy. The patient had multiple CD34+ cell populations at diagnosis, with higher BCL2 levels relative to BCL-xL or MCL-1. Following 3 cycles of therapy, marked reduction in these blast populations were observed.**

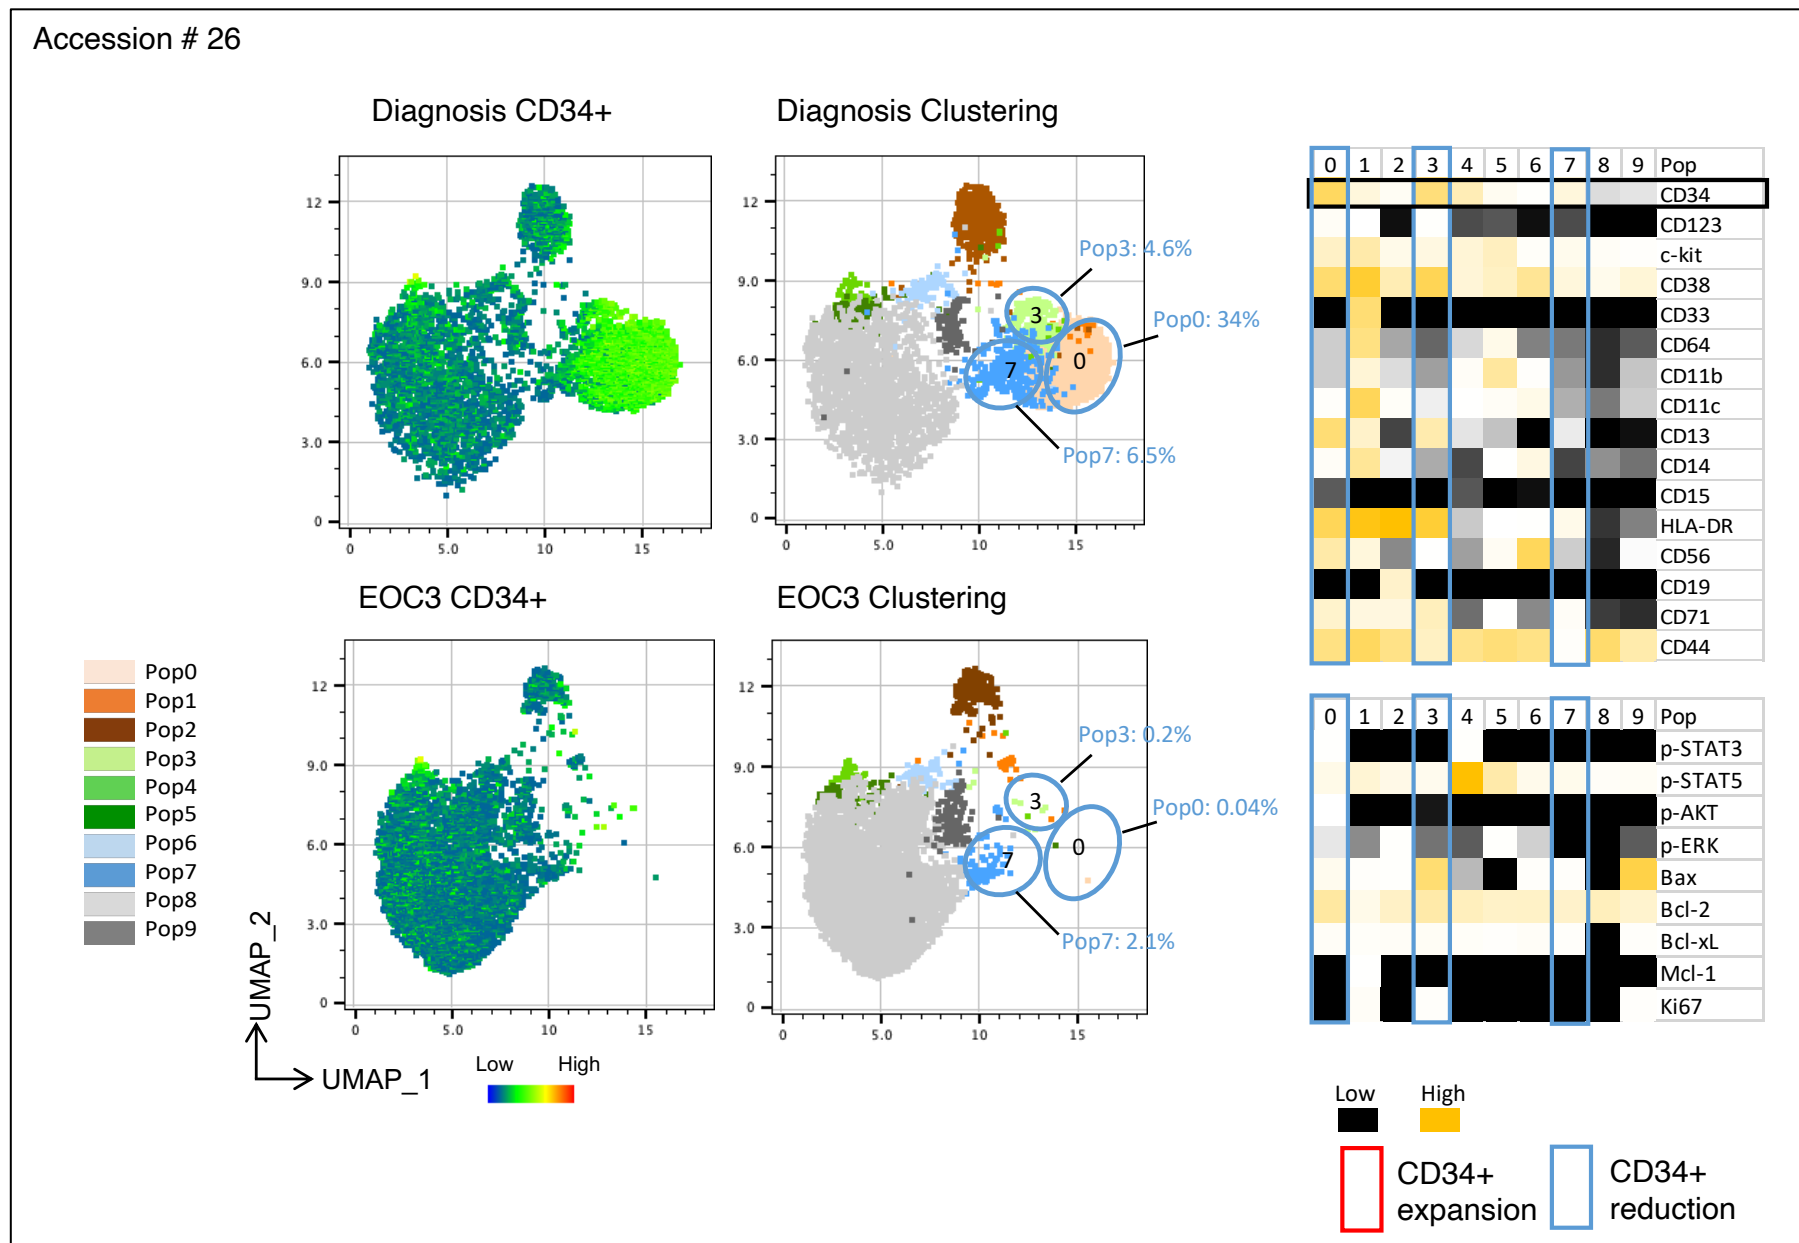

**Figure S16: Increased alternative anti-apoptotic protein expression is observed in maturing myeloid populations with monocytic differentiation.** CyTOF analysis in a patient with R/R-AML (accession #10) treated with IVO+VEN with a durable response to treatment following 41 cycles of therapy. Following cycle 3 of treatment, an expanding CD34+ cell populations with increased BCL-xL and MCL-1 levels was observed with an associated maturing CD14+ monocytic immunophenotype.

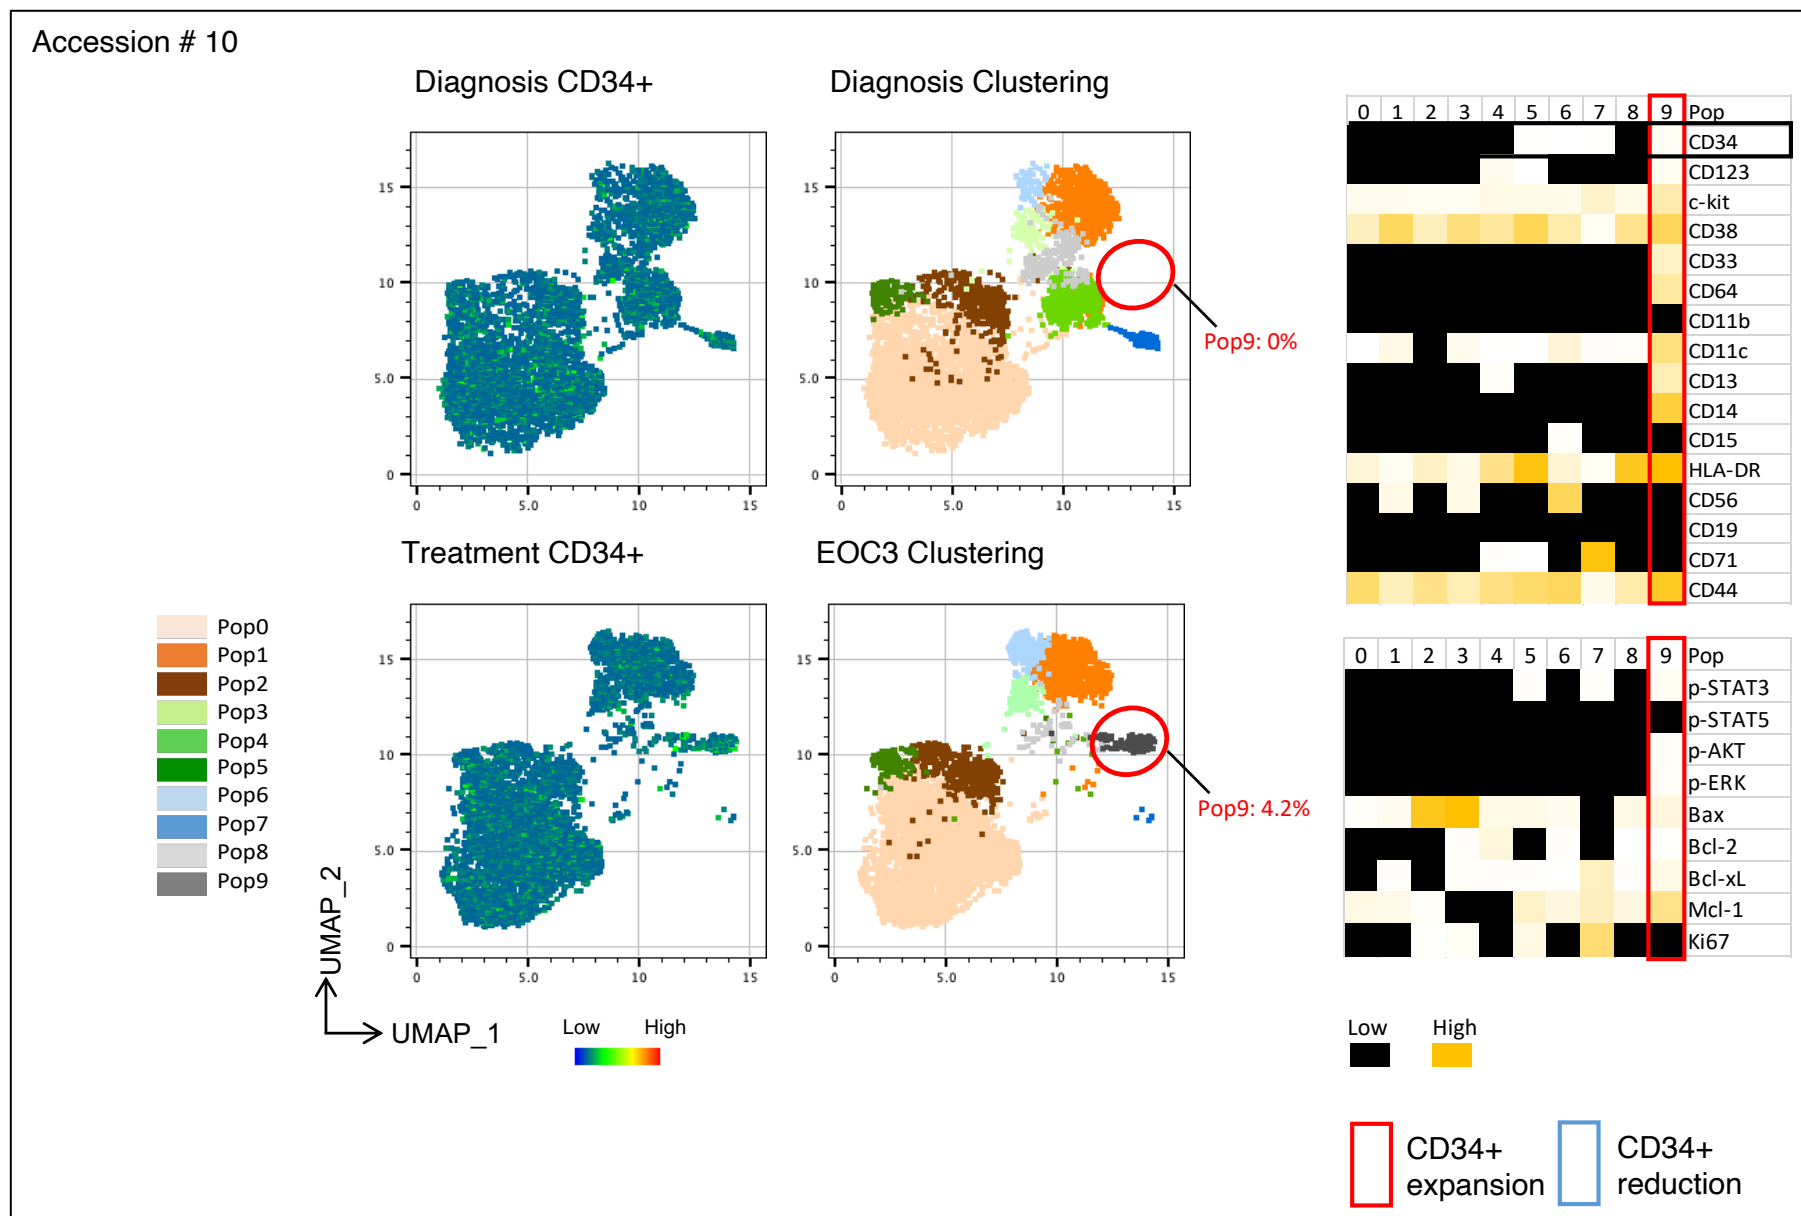

Supplement: bcd-22-0205_supplementary_tables_and_figures_suppst1-st7_sf1-sf16.pdf [file bcd-22-0205_supplementary_tables_and_figures_suppst1-st7_sf1-sf16.pdf]
